# Supplementary material
Source: PubMed Central journal article supplement (PMC9722270)
Supplement: NIHMS1847889-supplement-supplement.pdf [file NIHMS1847889-supplement-supplement.pdf]

## Renal Dysfunction Criteria in Critically Ill Children:

### The PODIUM Consensus Conference

Julie C. Fitzgerald, MD PhD MSCE<sup>a</sup>; Rajit K. Basu, MD, MS<sup>b</sup>; Dana Fuhrman, DO, MS<sup>c</sup>; Stephen M. Gorga, MD<sup>d</sup>; Amanda B. Hassinger, MD, MS<sup>e</sup>; L. Nelson Sanchez-Pinto, MD, MBI<sup>f</sup>; David T. Selewski, MD, MS<sup>g</sup>; Scott M. Sutherland, MD<sup>h</sup>; Ayse Akcan Arikan, MD<sup>i</sup>, on behalf of the Pediatric Organ Dysfunction Information Update Mandate (PODIUM) Collaborative

### Data Supplement

#### Table of Contents

| Content                                                                                                                                                   | Pages |
|-----------------------------------------------------------------------------------------------------------------------------------------------------------|-------|
| <b>Supplemental Figure 1.</b> Risk of Bias Assessment Summary for Studies Included in the PODIUM Renal Dysfunction Systematic Review (n=192 studies)      | 2     |
| <b>Supplemental Table 1.</b> Studies Included in the PODIUM Renal Dysfunction Systematic Review (n=192 studies)                                           | 3-20  |
| <b>Supplemental Table 2.</b> Performance Characteristics for Assessment Tools and Scores for Renal Dysfunction in Critically Ill Children (n=192 studies) | 21-51 |
| <b>Supplemental Table 3.</b> Literature Supporting Association of Existing Acute Kidney Injury Scores and Outcome                                         | 52    |
| <b>Supplemental Table 4.</b> Literature Supporting Association of Fluid Overload and Outcome                                                              | 53    |
| <b>References</b>                                                                                                                                         | 54-65 |
| <b>Research Priorities</b>                                                                                                                                | 66    |

**Supplemental Figure 1.** Risk of Bias Assessment Summary for Studies Included in the PODIUM Renal Dysfunction Systematic Review (n=192 studies)

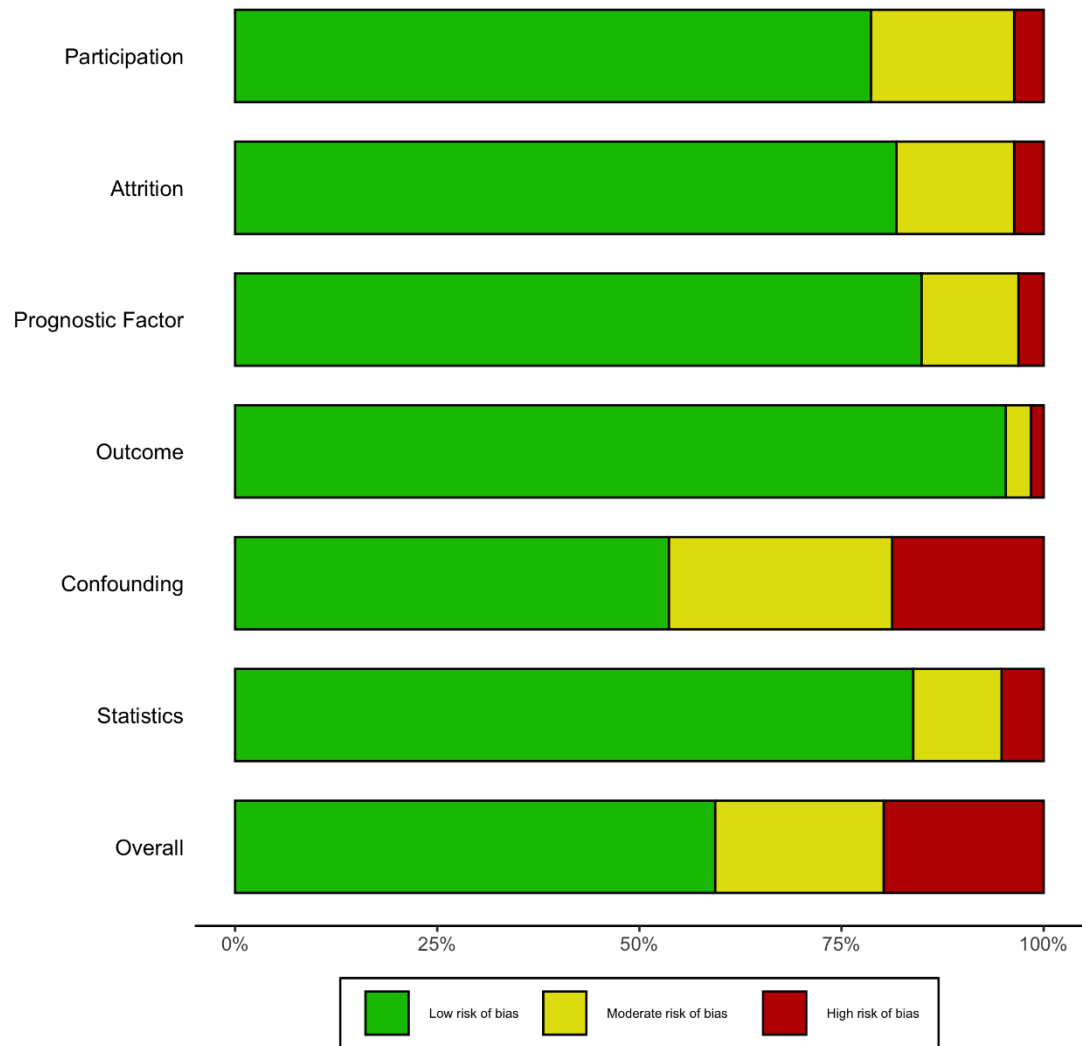

**Supplemental Table 1. Studies Included in the PODIUM Renal Dysfunction Systematic Review (n=192 studies)**

| Author (yr)         | Funding      | Study design                                                                                                    | Location   | No. of sites | Study years | Setting                              | Data source(s)                            | Simple size                  | Recruitment                                                      | Age categories <sup>a</sup>                    | Age details <sup>b</sup>                                 |
|---------------------|--------------|-----------------------------------------------------------------------------------------------------------------|------------|--------------|-------------|--------------------------------------|-------------------------------------------|------------------------------|------------------------------------------------------------------|------------------------------------------------|----------------------------------------------------------|
| Abulebda (2014)     | Govt.        | Retrospective cohort                                                                                            | USA        | 17           | NR          | PICU of unknown composition          | Registry                                  | 317                          | NR/Unable to determine                                           | Neonates<br>Infants<br>Children                | Median [IQR] 1.3 [0.2-4.5] and 2.9 [1.1-6.7] yr          |
| Afroz (2017)        | NR           | Observational/descriptive study, Other (Unable to assess article due to lack of access to full text in English) | Bangladesh | 1            | 2013-2014   | Other (Special Care Baby Unit)       | NR/Unable to determine                    | 44                           | NR/Unable to determine                                           | Neonates                                       | 28 out of 44 neonates were ≤7days                        |
| Akcan-Arikan (2007) | NR           | Prospective cohort                                                                                              | USA        | 1            | NR          | Mixed PICU (cardiac and non-cardiac) | Prospective data collection               | 150                          | Consecutive                                                      | Infants<br>Children<br>Adolescents             | Mean 6.4 (6.4)                                           |
| Akcan-Arikan (2017) | Industry     | Prospective cohort                                                                                              | USA        | 1            | 2012-2014   | Mixed PICU (cardiac and non-cardiac) | Prospective data collection               | 2830                         | Consecutive                                                      | Children<br>Adolescents                        | Median 5.5 yr [IQR 1.3-12.9 yr]                          |
| Alcaraz (2013)      | NR           | Observational/descriptive study                                                                                 | Spain      | 1            | 2010-2010   | PCICU (cardiac only)                 | Prospective data collection               | 114                          | Consecutive                                                      | Neonates<br>Infants<br>Children<br>Adolescents | 25 [6-72] mo                                             |
| Ali (2013)          | NR           | Case/control study (case matched)                                                                               | USA        | 1            | 2010-2011   | PCICU (cardiac only)                 | Prospective data collection               | 19 (100 in the parent study) | Other (Nested case-control study of a larger prospective cohort) | Neonates<br>Infants<br>Children<br>Adolescents | Mean (SD) AKI 24.2 (40), no AKI 56.86 (69)               |
| Alkandari (2011)    | Govt.<br>NGO | Retrospective cohort                                                                                            | Canada     | 2            | 2000-2007   | PICU (non-cardiac only)              | Chart review, Prospective data collection | 2106                         | Consecutive                                                      | Neonates<br>Infants<br>Children<br>Adolescents | Mean 5.8 (5.7)                                           |
| Amini (2017)        | NGO          | Prospective cohort                                                                                              | Iran       | 1            | 2013-2016   | PCICU (cardiac only)                 | Prospective data collection               | 519                          | Consecutive                                                      | Neonates<br>Infants<br>Children<br>Adolescents | Mean age of males 40.3 (43.7) mo; Females 40.1 (45.9) mo |
| Arikan (2012)       | NR           | Retrospective cohort                                                                                            | USA        | 1            | 2004-2005   | PICU (non-cardiac only)              | Chart review                              | 80                           | Consecutive                                                      | Neonates<br>Infants<br>Children<br>Adolescents | Median 15.5 mo (95.5)                                    |
| Asilioglu (2012)    | NGO          | Prospective cohort                                                                                              | Turkey     | 2            | NR          | PICU (non-cardiac only)              | Prospective data collection               | 98                           | Consecutive                                                      | Neonates<br>Infants<br>Children<br>Adolescents | Median 1.6 [0.1-16.9] yr                                 |

|                 |           |                      |                                            |     |           |                                      |                             |      |                        |                                                |                                                                                                                                                |
|-----------------|-----------|----------------------|--------------------------------------------|-----|-----------|--------------------------------------|-----------------------------|------|------------------------|------------------------------------------------|------------------------------------------------------------------------------------------------------------------------------------------------|
| Askenazi (2019) | Govt. NGO | Retrospective cohort | Australia, USA, Canada, India              | 24  | 2014-2014 | Other (NICU)                         | Registry                    | 353  | NR/Unable to determine | Neonates                                       | Not reported (data for GA $\geq$ 36wk detailed below)                                                                                          |
| Askenazi (2011) | NGO       | Retrospective cohort | NR                                         | 110 | 1998-2008 | PICU (non-cardiac only)              | Registry                    | 7941 | Consecutive            | Neonates<br>Infants<br>Children<br>Adolescents | Neonatal nonsurvivors 3.3 (5.3) days; Neonatal survivors 2.5 (3.5) days; Pediatric Nonsurvivors 4.9 (5.9) yr; Pediatric Survivors 4.4 (5.5) yr |
| Aygun (2018)    | NR        | Retrospective cohort | Turkey                                     | 1   | 2016-2018 | PICU of unknown composition          | Chart review                | 447  | Consecutive            | Infants<br>Children<br>Adolescents             | Mean 3.74 (4.70)                                                                                                                               |
| Bai (2018)      | Govt. NGO | Prospective cohort   | China                                      | 1   | 2012-2012 | Mixed PICU (cardiac and non-cardiac) | Prospective data collection | 144  | Consecutive            | Neonates<br>Infants<br>Children<br>Adolescents | Non-AKI (n=123): 12mo [4-48]; Mild AKI (n=10):30.5 mo [11.25-98]; Severe AKI (n=11): 59mo [4-98]                                               |
| Baskin (2005)   | NR        | Case series          | Turkey                                     | 1   | NR        | PCICU (cardiac only)                 | Chart review                | 64   | Consecutive            | Neonates<br>Infants<br>Children<br>Adolescents | Median 4 mo [IQR 0-22 mo]                                                                                                                      |
| Basu (2017)     | NR        | Prospective cohort   | Multiple (USA, Canada, multiple in Europe) | 32  | 2014-2014 | Mixed PICU (cardiac and non-cardiac) | Prospective data collection | 4000 | Consecutive            | Infants<br>Children<br>Adolescents             | 3 mo – 21 yr                                                                                                                                   |
| Basu (2011)     | Govt.     | Prospective cohort   | Multiple                                   | 11  | NR        | PICU (non-cardiac only)              | Prospective data collection | 179  | Consecutive            | Neonates<br>Infants<br>Children                | 2.4-2.7 yr                                                                                                                                     |
| Basu (2014)     | Govt.     | Prospective cohort   | Multiple                                   | 11  | NR        | PICU (non-cardiac only)              | Prospective data collection | 214  | Consecutive            | Neonates<br>Infants<br>Children                | 2.4-3 yr                                                                                                                                       |
| Basu (2014)     | NGO       | Retrospective cohort | USA and Canada                             | 13  | NR        | PICU (non-cardiac only)              | Prospective data collection | 584  | Consecutive            | Neonates<br>Infants<br>Children                | 1.5-3.8 yr                                                                                                                                     |
| Bennett (2018)  | Govt.     | Prospective cohort   | USA                                        | 1   | NR        | PICU (cardiac only)                  | Prospective data collection | 101  | NR/Unable to determine | Neonates<br>Infants<br>Children<br>Adolescents | No AKI: median 3.9yr [0.7-6.6], AKI median 1.8 yr [0.5-5.3]                                                                                    |
| Bennett (2008)  | Industry  | Prospective cohort   | USA                                        | 1   | 2004-2006 | NR/Unable to determine               | Prospective data collection | 196  | Consecutive            | Neonates<br>Infants<br>Children<br>Adolescents | Mean (SD) 3.2 (0.4) and 4.8 (0.5) yr                                                                                                           |
| Bestati (2010)  | Govt.     | Prospective cohort   | France, Canada, Switzerland,               | 7   | 1998-2000 | Mixed PICU (cardiac and non-cardiac) | Prospective data collection | 1806 | Consecutive            | Neonates<br>Infants<br>Children<br>Adolescents | NR                                                                                                                                             |

|                   |                |                      |                                      |                        |           |                                      |                             |      |                        |                                                |                                                                                                                                                                                                                                                                                                                                                    |
|-------------------|----------------|----------------------|--------------------------------------|------------------------|-----------|--------------------------------------|-----------------------------|------|------------------------|------------------------------------------------|----------------------------------------------------------------------------------------------------------------------------------------------------------------------------------------------------------------------------------------------------------------------------------------------------------------------------------------------------|
| Bhaskar (2015)    | NGO            | Retrospective cohort | USA                                  | 1                      | 2009-2010 | Mixed PICU (cardiac and non-cardiac) | Chart review                | 114  | Consecutive            | Neonates<br>Infants<br>Children<br>Adolescents | Median age 1.1y [IQR 0.0, 17.4]                                                                                                                                                                                                                                                                                                                    |
| Bjork (2019)      | NR             | Retrospective cohort | Netherlands, Belgium, France, Sweden | NR/Unable to determine | 2004-2016 | NR/Unable to determine               | Registry                    | 3408 | NR/Unable to determine | Children<br>Adolescents                        | Median 12.3yr, 2.5th%ile 2.6yr, 97.5th%ile 17.8yr                                                                                                                                                                                                                                                                                                  |
| Bojan (2014)      | NGO            | Prospective cohort   | France                               | 1                      | 2010-2011 | PCICU (cardiac only)                 | Prospective data collection | 200  | Consecutive            | Neonates<br>Infants                            | Median [IQR] Normal 84 days [9-163], Severe AKI 74days [7.5-119], Very severe AKI 30days [11.7-72.7]                                                                                                                                                                                                                                               |
| Bojan (2013)      | NR             | Retrospective cohort | France                               | 1                      | 2007-2010 | PCICU (cardiac only)                 | Chart review                | 1467 | NR/Unable to determine | Neonates<br>Infants                            | The authors explored serum creatinine kinetics using a partitioning algorithm called Kml. They group the patients into a "decreasing", "increasing" and "severe" trajectory of change in serum creatinine. The mean (SD) for age of the 3 trajectories were: 5.7 (2) days for "decreasing", 5.7 (2.4) for "increasing", and 5.0 (3.0) for "severe" |
| Borasino (2018)   | NR             | Retrospective cohort | USA                                  | 1                      | 2012-2015 | PCICU (cardiac only)                 | Chart review                | 90   | Consecutive            | Neonates<br>Infants                            | Median 11.9 days [IQR 6.2-56.1]                                                                                                                                                                                                                                                                                                                    |
| Bresolin (2013)   | NR             | Prospective cohort   | Brazil                               | 1                      | 2008-2008 | NR/Unable to determine               | Prospective data collection | 126  | Consecutive            | Infants<br>Children<br>Adolescents             | No AKI vs AKI: 6.8 (5.4) vs. 2.3 (3.5)                                                                                                                                                                                                                                                                                                             |
| Bucholz (2015)    | Govt. Industry | Prospective cohort   | Canada, USA                          | 3                      | 2007-2009 | PCICU (cardiac only)                 | Prospective data collection | 106  | Consecutive            | Infants<br>Children<br>Adolescents             | No AKI 53.1 (64) mo; mild AKI 33.2 (45) Severe AKI 13.3 (23)                                                                                                                                                                                                                                                                                       |
| Burra (2018)      | Other (None)   | Prospective cohort   | India                                | 1                      | NR        | PCICU (cardiac only)                 | Prospective data collection | 51   | Consecutive            | Neonates<br>Infants<br>Children                | AKI group (N=10) median 0.99 yr [IQR 0.17, 1.99]. Non-AKI group (N=41) 0.75 yr [IQR 0.35, 1.4]                                                                                                                                                                                                                                                     |
| Cabral (2015)     | NR             | Retrospective cohort | Brazil                               | 1                      | 2009-2010 | PICU of unknown composition          | Chart review, Registry      | 375  | Consecutive            | Infants<br>Children<br>Adolescents             | Median [IQR] 24.2 mo [6.8-81.8]                                                                                                                                                                                                                                                                                                                    |
| Cantinotti (2017) | NR             | Prospective cohort   | Italy                                | 1                      | 2012-2015 | PCICU (cardiac only)                 | Prospective data collection | 248  | Consecutive            | Neonates<br>Infants<br>Children                | Median 6.5 mo [1.7, 40.1]                                                                                                                                                                                                                                                                                                                          |

|                        |              |                                   |        |   |           |                                                            |                                                    |      |                                                                 |                                                |                                                               |
|------------------------|--------------|-----------------------------------|--------|---|-----------|------------------------------------------------------------|----------------------------------------------------|------|-----------------------------------------------------------------|------------------------------------------------|---------------------------------------------------------------|
|                        |              |                                   |        |   |           |                                                            |                                                    |      |                                                                 | Adolescents                                    |                                                               |
| Cantinotti (2012)      | Industry     | Prospective cohort                | Italy  | 1 | 2010-2011 | PCICU (cardiac only)                                       | Prospective data collection                        | 135  | Consecutive                                                     | Neonates<br>Infants<br>Children<br>Adolescents | Median age 7 mo [IQR 1-49 mo]                                 |
| Cavallin (2019)        | NR           | Prospective cohort                | Italy  | 1 | 2009-2016 | Other (NICU)                                               | Prospective data collection                        | NR   | Consecutive                                                     | Neonates                                       | Newborns                                                      |
| Chiravuri (2011)       | NR           | Case/control study (case matched) | USA    | 1 | 1998-2006 | PCICU (cardiac only)                                       | Chart review, Other (Institutional database query) | 494  | Other (Case control, selected from nephrology consult database) | Neonates<br>Infants<br>Children<br>Adolescents | Mean 1.45 (3.6)                                               |
| Choi (2017)            | NR           | Retrospective cohort              | Korea  | 1 | 2009-2015 | Mixed PICU (cardiac and non-cardiac)                       | Chart review                                       | 123  | Consecutive                                                     | Neonates<br>Infants<br>Children<br>Adolescents | Mean 9.5 (7.2)                                                |
| Colasacco (2011)       | NR           | Prospective cohort                | USA    | 1 | 2017-2017 | PCICU (cardiac only)                                       | Prospective data collection                        | 48   | Consecutive                                                     | Neonates<br>Infants                            | NR                                                            |
| D'Ariezo (2019)        | Govt.        | Retrospective cohort              | Canada | 2 | 2003-2005 | Mixed PICU (cardiac and non-cardiac)                       | Other (Administrative data)                        | 1696 | Consecutive                                                     | Neonates<br>Infants<br>Children<br>Adolescents | AKI mean 7.3 yr (5.9), no AKI (6.5 (5.9))                     |
| De Fontnouvelle (2017) | Govt.        | Prospective cohort                | USA    | 3 | 2007-2010 | Mixed PICU (cardiac and non-cardiac), PCICU (cardiac only) | Prospective data collection                        | 412  | Consecutive                                                     | Infants<br>Children<br>Adolescents             | Stratified by age: <2 yr mean 0.5 yr (0.3); >2yr mean 6.2 (4) |
| de Galasso (2016)      | NR           | Retrospective cohort              | Italy  | 1 | 2000-2012 | PICU of unknown composition                                | Chart review                                       | 131  | Consecutive                                                     | Neonates<br>Infants<br>Children                | Median 7 yr [2-13]                                            |
| de Melo Bezerra (2013) | NR           | Retrospective cohort              | Brazil | 1 | 2010-2011 | Other (NICU)                                               | Chart review                                       | 312  | Consecutive                                                     | Neonates                                       | NR                                                            |
| Deep (2018)            | Govt.        | Prospective cohort                | UK     | 1 | 2010-2014 | PICU (non-cardiac only)                                    | Prospective data collection                        | 73   | Consecutive                                                     | Infants<br>Children<br>Adolescents             | Mean 7 yr                                                     |
| Dent (2007)            | Industry     | Prospective cohort                | USA    | 1 | 2004-2006 | PCICU (cardiac only)                                       | Prospective data collection                        | 120  | NR/Unable to determine                                          | Neonates<br>Infants<br>Children<br>Adolescents | Mean (SD) 3.4 (0.5) and 4.9 (0.7) yr                          |
| Devarajan (2010)       | NR           | Prospective cohort                | USA    | 1 | 2004-2007 | PCICU (cardiac only)                                       | Prospective data collection                        | 395  | Other (Consecutive consenting)                                  | Neonates<br>Infants<br>Children<br>Adolescents | Controls mean 3.9 yr (4.5), AKI mean 3.6 yr (4.6)             |
| Diaz (2017)            | Other (None) | Prospective cohort                | USA    | 1 | 2007-2007 | PICU (non-cardiac only)                                    | Registry                                           | 224  | Consecutive                                                     | Infants<br>Children<br>Adolescents             | Median 3.3 [IQR 0.7-9.9] yr                                   |

|                   |       |                                           |                |     |           |                                                                      |                                           |     |                                                     |                                                |                                                               |
|-------------------|-------|-------------------------------------------|----------------|-----|-----------|----------------------------------------------------------------------|-------------------------------------------|-----|-----------------------------------------------------|------------------------------------------------|---------------------------------------------------------------|
| Dobiliene (2019)  | NR    | Prospective cohort                        | Lithuania      | 1   | 2013-2016 | PICU (non-cardiac only)                                              | Prospective data collection               | 107 | Consecutive                                         | Infants<br>Children<br>Adolescents             | AKI Median 30 mo [IQR 12-180] (approximately, see Figure 1)   |
| Dong (2017)       | Govt. | Case/control study (case matched)         | USA            | 1   | 2004-2007 | PCICU (cardiac only)                                                 | Chart review, Prospective data collection | 150 | Consecutive                                         | Neonates<br>Infants<br>Children<br>Adolescents | Not available for whole cohort                                |
| Dubey (2000)      | NR    | Case/control study (case matched)         | India          | 1   | NR        | Mixed PICU (cardiac and non-cardiac), Other (Controls from clinic)   | Prospective data collection               | 50  | NR/Unable to determine                              | Infants<br>Children                            | Mean 4.7 (3.9)                                                |
| Elella (2017)     | NR    | Retrospective cohort                      | Saudi Arabia   | 1   | 2011-2016 | PCICU (cardiac only)                                                 | EMR query                                 | 59  | NR/Unable to determine                              | Neonates<br>Infants<br>Children<br>Adolescents | Mean 11 (16.5)                                                |
| El-Gamasy (2018)  | NR    | Case/control study (case matched)         | Saudi Arabia   | 4   | 2016-2017 | PICU of unknown composition                                          | Prospective data collection               | 180 | Convenience                                         | Infants<br>Children                            | Mean 40 (44)                                                  |
| Esch (2015)       | NGO   | Retrospective cohort                      | USA of America | 1   | 2003-2009 | PCICU (cardiac only)                                                 | Chart review                              | 211 | Consecutive                                         | Children                                       | Median 2.7 yr [IQR 2.2-3.3]                                   |
| Fang (2018)       | Govt. | Prospective cohort                        | China          | 1   | 2016-2016 | PICU (non-cardiac only)                                              | Prospective data collection               | 510 | Consecutive                                         | Neonates<br>Infants<br>Children<br>Adolescents | Survivors: 1.37 [0.33-16] mo; non-survivors: 0.97 [0.33-13.5] |
| Fargason (1993)   | NR    | Retrospective cohort                      | USA            | 1   | 1984-1988 | Mixed PICU (cardiac and non-cardiac), Hospital floor outside the ICU | Chart review                              | 31  | Other (Selected from nephrology consultation cases) | Infants<br>Children<br>Adolescents             | 9.6 [range 1 mo-19 yr]                                        |
| Ferah (2019)      | NR    | Retrospective cohort                      | Turkey         | 1   | 2005-2017 | PICU (non-cardiac only), Hospital floor outside the ICU              | Chart review                              | 51  | Consecutive                                         | Infants<br>Children<br>Adolescents             | Mean 6.4 (4.6) yr                                             |
| Fernandez (2005)  | NR    | Prospective cohort                        | Spain          | 1   | 1996-2002 | Mixed PICU (cardiac and non-cardiac)                                 | Prospective data collection               | 53  | NR/Unable to determine                              | Neonates<br>Infants<br>Children<br>Adolescents | Mean 37.1 (48.7) mo                                           |
| Ferrer (2018)     | NR    | Prospective cohort                        | Brazil         | 1   | 2014-2014 | PCICU (cardiac only)                                                 | Prospective data collection               | 86  | Consecutive                                         | Neonates<br>Infants<br>Children<br>Adolescents | Median 0.8 [0.4-4.0] yr                                       |
| Fitzgerald (2016) | Govt. | Prospective cohort, Cross-sectional study | NR             | 100 | 2013-2014 | PICU (non-cardiac only)                                              | Chart review                              | 493 | Consecutive                                         | Neonates<br>Infants<br>Children<br>Adolescents | NR                                                            |

|                            |                    |                                                           |             |    |           |                                      |                                                                              |                                               |                                                         |                                                |                                                                       |
|----------------------------|--------------------|-----------------------------------------------------------|-------------|----|-----------|--------------------------------------|------------------------------------------------------------------------------|-----------------------------------------------|---------------------------------------------------------|------------------------------------------------|-----------------------------------------------------------------------|
| Flores (2008)              | NR                 | Prospective cohort                                        | USA         | 13 | 2001-2005 | Mixed PICU (cardiac and non-cardiac) | Prospective data collection                                                  | 51                                            | Consecutive                                             | Neonates<br>Infants<br>Children<br>Adolescents | Mean 11.24 (0.97)                                                     |
| Flori (2011)               | Govt.              | Retrospective cohort                                      | USA         | 2  | 1996-2000 | PICU of unknown composition          | Registry                                                                     | 313                                           | NR/Unable to determine                                  | Neonates<br>Infants<br>Children<br>Adolescents | Median 3.4 yr [IQR 1 day-18 yr]                                       |
| Foland (2004)              | NR                 | Retrospective cohort                                      | USA         | 1  | 1997-2003 | PICU (non-cardiac only)              | Chart review                                                                 | 113                                           | Other (Patients on CRRT)                                | Infants<br>Children<br>Adolescents             | Median 9.6 [2.5, 14.3] yr                                             |
| Fuhrman (2019)             | NGO                | Prospective cohort                                        | USA         | 1  | 2016-2018 | PICU (non-cardiac only)              | Prospective data collection                                                  | 17                                            | Consecutive                                             | Infants<br>Children<br>Adolescents             | Median 102 [23-177] mo                                                |
| Gawadia (2019)             | Other (No funding) | Prospective cohort                                        | India       | 1  | 2017-2017 | Mixed PICU (cardiac and non-cardiac) | Prospective data collection                                                  | 162                                           | Other (Consecutive but informed consent was required)   | Infants<br>Children                            | RAI+ 7 (3-24) RAI-ve 24 (4-60) mo, total cohort not reported          |
| Gillespie (2004)           | Govt.              | Retrospective cohort                                      | USA         | 1  | 1993-2002 | Mixed PICU (cardiac and non-cardiac) | Chart review                                                                 | 88                                            | Consecutive                                             | Neonates<br>Infants<br>Children<br>Adolescents | Mean 5.1 yr (5.7)                                                     |
| Gil-RuizGil-Esparza (2014) | NR                 | Retrospective cohort                                      | Spain       | 1  | 2008-2010 | Mixed PICU (cardiac and non-cardiac) | Chart review                                                                 | 409                                           | Consecutive                                             | Neonates<br>Infants<br>Children<br>Adolescents | No AKI median 15.5 mo [6-60], Early AKI 7.5 [3-60], Late AKI 8 [5-73] |
| Giordano (2017)            | Other (Unfunded)   | Prospective cohort                                        | Italy       | 1  | 2014-2016 | PCICU (cardiac only)                 | Chart review, Prospective data collection                                    | 29                                            | Consecutive                                             | Neonates                                       | Mean 8.1 days (3.5)                                                   |
| Gist (2016)                | Govt. NGO          | Prospective cohort                                        | USA         | 1  | 2011-2012 | PCICU (cardiac only)                 | Prospective data collection                                                  | 106                                           | Consecutive                                             | Neonates<br>Infants<br>Children                | Median 22 [7-69] days (this is NIRS reduction group only)             |
| Goldstein (2005)           | Industry           | Prospective cohort                                        | USA         | 7  | 2001-2003 | PICU of unknown composition          | Registry                                                                     | 116                                           | Consecutive                                             | Neonates<br>Infants<br>Children<br>Adolescents | Mean 8.5 yr (6.8)                                                     |
| Goldstein (2001)           | NR                 | Retrospective cohort                                      | USA         | 1  | 1996-1998 | PICU (non-cardiac only)              | Chart review                                                                 | 21                                            | Consecutive                                             | Neonates<br>Infants<br>Children<br>Adolescents | Survivors: 8 (5.3), non-survivors: 9.4 (7.1)                          |
| Greenberg (2015)           | Govt. NGO          | Prospective cohort                                        | Canada, USA | 3  | 2007-2010 | PCICU (cardiac only)                 | Prospective data collection                                                  | 106                                           | Consecutive                                             | Infants<br>Children<br>Adolescents             | No AKI, Mild AKI and Stage 2 AKI: 53 (64), 33 (45), 13 (23) mo        |
| Haase (2011)               | Govt. NGO          | Other (Pooled analysis of multiple observational studies) | Canada, USA | 4  | NR        | Mixed PICU (cardiac and non-cardiac) | Other (This was a pooled analysis of prospective observational studies, 4 of | 483 for plasma ngal across pediatric studies; | Other (Pooled analysis of many studies. Will not review | NR/Unable to determine                         | See comment above                                                     |



|                  |                                          |                                                          |                |   |           |                                                      |                                                                     |                                                                                                                           |                              |                                                |                                                                                              |
|------------------|------------------------------------------|----------------------------------------------------------|----------------|---|-----------|------------------------------------------------------|---------------------------------------------------------------------|---------------------------------------------------------------------------------------------------------------------------|------------------------------|------------------------------------------------|----------------------------------------------------------------------------------------------|
|                  |                                          |                                                          |                |   |           |                                                      | which were pediatric)                                               | 416 for urine ngal                                                                                                        | each study individually)     |                                                |                                                                                              |
| Hamed (2013)     | NR                                       | Prospective cohort                                       | Egypt          | 1 | 2011-2011 | PICU of unknown composition                          | Prospective data collection                                         | 32                                                                                                                        | Consecutive                  | Neonates<br>Infants<br>Children<br>Adolescents | Median 7 mo                                                                                  |
| Han (2008)       | Govt.                                    | Case/control study (case matched), Cross-sectional study | USA            | 2 | 2004-2005 | PCICU (cardiac only), Hospital floor outside the ICU | Chart review, Prospective data collection, Other (Residual samples) | 29 inpatient adults, 15 outpatient adults; case-control = 20 post-CPB children with AKI, 20 controls post-CPB without AKI | Consecutive                  | Neonates<br>Infants<br>Children<br>Adolescents | AKI Mean 2 yr (1.2), no AKI 4.4 yr (1.3)                                                     |
| Hassinger (2014) | NGO                                      | Prospective cohort                                       | USA            | 1 | 2009-2010 | PCICU (cardiac only)                                 | Prospective data collection                                         | 98                                                                                                                        | Consecutive                  | Neonates<br>Infants<br>Children<br>Adolescents | Early fluid overload (n=30) 6.5mo [4-29.5]; No early FO (n=68) 60.5mo [6.3-143.5]            |
| Hassinger (2012) | NGO                                      | Prospective cohort                                       | USA            | 1 | 2009-2010 | PCICU (cardiac only)                                 | Prospective data collection                                         | 100                                                                                                                       | Consecutive                  | Neonates<br>Infants<br>Children<br>Adolescents | Elevated pre-op ADMA level (n=29) 4mo [4-6.5]; normal pre-op ADMA level (n=71) 61mo [21-144] |
| Hassinger (2012) | NGO                                      | Prospective cohort                                       | USA            | 1 | 2009-2010 | PCICU (cardiac only)                                 | Prospective data collection                                         | 100                                                                                                                       | Consecutive                  | Neonates<br>Infants<br>Children<br>Adolescents | AKI group 37.5 mo [8.3-122.3], no AKI 29.5 mo [4-96.5]                                       |
| Hayes (2009)     | NR                                       | Retrospective cohort                                     | USA            | 1 | 2000-2005 | PICU (non-cardiac only)                              | Chart review                                                        | 76                                                                                                                        | Consecutive, Other (On CRRT) | Neonates<br>Infants<br>Children<br>Adolescents | Median 5.8 [range 0-18.9]                                                                    |
| Hazle (2013)     | Other (Division of Pediatric Cardiology) | Prospective cohort                                       | USA of America | 1 | 2009-2010 | PCICU (cardiac only)                                 | Prospective data collection                                         | 49                                                                                                                        | Convenience                  | Neonates<br>Infants                            | NR                                                                                           |

|                   |                             |                                                                                           |               |    |           |                                          |                                                                            |          |                                         |                                                |                                                |
|-------------------|-----------------------------|-------------------------------------------------------------------------------------------|---------------|----|-----------|------------------------------------------|----------------------------------------------------------------------------|----------|-----------------------------------------|------------------------------------------------|------------------------------------------------|
| Herbert (2015)    | NGO                         | Prospective cohort                                                                        | USA           | 1  | 2011-2012 | PCICU (cardiac only)                     | Prospective data collection                                                | 17       | NR/Unable to determine                  | Neonates<br>Infants                            | Median 76 [range 5-272] days                   |
| Hessey (2017)     | Govt. NGO                   | Retrospective cohort                                                                      | Canada        | 2  | 2003-2005 | Mixed PICU (cardiac and non-cardiac)     | Chart review, EMR query, Other (Provincial administrative healthcare data) | 538      | Consecutive                             | Neonates<br>Infants<br>Children<br>Adolescents | Mean 6.4 (5.9)                                 |
| Hessey (2018)     | Govt.                       | Retrospective cohort                                                                      | Canada        | 2  | 2003-2005 | PICU (non-cardiac only)                  | Chart review                                                               | 1622     | Consecutive                             | Neonates<br>Infants<br>Children<br>Adolescents | Mean 6.5yr (5.8)                               |
| Hoffman (2013)    | NR                          | Prospective cohort                                                                        | USA           | 1  | 2010-2011 | Other (NICU – but only on term newborns) | Prospective data collection                                                | 35 cases | Other (Consecutive with verbal consent) | Neonates                                       | Term newborns (median GA 39 weeks)             |
| Hollander (2016)  | Other (No external funding) | Retrospective cohort                                                                      | USA           | 1  | 2007-2013 | PCICU (cardiac only)                     | Chart review                                                               | 88       | Consecutive                             | Neonates<br>Infants<br>Children<br>Adolescents | Median 6.3 yr [IQR 0.03 - 18.5]                |
| Hornik (2014)     | Govt. Industry              | Prospective cohort                                                                        | Canada<br>USA | 3  | 2007-2009 | PCICU (cardiac only)                     | Prospective data collection                                                | 277      | Consecutive                             | Infants<br>Children<br>Adolescents             | Mean 3.8 (4.5) yr                              |
| Hui (2013)        | NR                          | Observational/descriptive study                                                           | Hong Kong     | 1  | 2005-2007 | PICU (non-cardiac only)                  | Chart review                                                               | 140      | Other (With Foley, no CKD)              | Infants<br>Children<br>Adolescents             | Mean 8.5 (6.4) yr                              |
| Jayakumar (2013)  | Govt. NGO                   | Observational/descriptive study, Other (Secondary analysis from a parent biomarker study) | USA           | 1  | 2006-2007 | PCICU (cardiac only)                     | Prospective data collection                                                | 60       | Consecutive                             | NR/Unable to determine                         | Mean 4 (4.5) yr                                |
| Jhang (2014)      | NR                          | Prospective cohort                                                                        | Korea         | 1  | 2005-2011 | NR/Unable to determine                   | Prospective data collection                                                | 87       | Consecutive                             | NR/Unable to determine                         | Mean 7.85 (6.37) yr                            |
| Joffe (2018)      | Industry                    | Prospective cohort                                                                        | Canada        | 1  | 2013-2015 | PCICU (cardiac only)                     | Prospective data collection                                                | 66       | Consecutive                             | Infants                                        | Median 5.9 mo [4.6-11.5]                       |
| Kaddourah (2017)  | NGO                         | Prospective cohort, Observational/descriptive study                                       | NR            | 32 | 2014-2014 | PICU (non-cardiac only)                  | Prospective data collection                                                | 4984     | Consecutive                             | Infants<br>Children<br>Adolescents             | Median 66 mo [IQR 18.8-151.1]                  |
| Kakajiwala (2017) | NR                          | Retrospective cohort                                                                      | USA           | 1  | 2013-2015 | PCICU (cardiac only)                     | Chart review                                                               | 568      | Consecutive                             | Neonates<br>Infants                            | Median [IQR] 18 [5-107] and 89 [5.75-150] days |
| Kari (2018)       | NGO                         | Prospective cohort                                                                        | Saudi Arabia  | 1  | 2014-2015 | Mixed PICU (cardiac and non-cardiac)     | Prospective data collection                                                | 40       | NR/Unable to determine                  | Infants<br>Children<br>Adolescents             | Median 30 mo [IQR 8-78]                        |

|                      |                    |                                                     |                |   |           |                                             |                                                      |      |                                  |                                                |                                                                                  |
|----------------------|--------------------|-----------------------------------------------------|----------------|---|-----------|---------------------------------------------|------------------------------------------------------|------|----------------------------------|------------------------------------------------|----------------------------------------------------------------------------------|
| Kaur (2018)          | NR                 | Prospective cohort                                  | India          | 1 | NR        | Mixed PICU (cardiac and non-cardiac)        | Prospective data collection                          | 413  | Consecutive                      | Infants<br>Children<br>Adolescents             | Mean 5.89 (5.31) yr                                                              |
| Kavaz (2012)         | NR                 | Prospective cohort                                  | Turkey         | 1 | 2009-2010 | Mixed PICU (cardiac and non-cardiac)        | Chart review, Prospective data collection            | 189  | Consecutive                      | Neonates<br>Infants<br>Children<br>Adolescents | Mean 45.9 mo (54.7)                                                              |
| Krawczeski (2010)    | Govt. NGO          | Prospective cohort                                  | USA            | 1 | 2004-2007 | PCICU (cardiac only)                        | Prospective data collection                          | 376  | Consecutive                      | Neonates<br>Infants<br>Children<br>Adolescents | Only reported for AKI: Mean 1.5 yr (2.9) and non-AKI Mean 4.4 yr (5.4) subgroups |
| Krawczeski (2011)    | NR                 | Prospective cohort                                  | USA            | 1 | 2004-2007 | PCICU (cardiac only)                        | Prospective data collection                          | 220  | Other (Consecutive with consent) | Neonates<br>Infants<br>Children<br>Adolescents | No AKI 3.3 yr [IQR 0.5, 6.0]; AKI 0.6 yr [IQR 0.4, 1.8]                          |
| Krawczeski (2011)    | Industry           | Observational/descriptive study                     | USA            | 1 | 2004-2007 | PCICU (cardiac only)                        | Prospective data collection                          | 374  | Consecutive                      | Neonates<br>Infants<br>Children<br>Adolescents | Range 0.2-3.5 yr (mostly neonates)                                               |
| Krishnamurthy (2013) | Other (None)       | Prospective cohort, Observational/descriptive study | India          | 1 | 2010-2011 | PICU (non-cardiac only)                     | Prospective data collection                          | 54   | Consecutive                      | Infants<br>Children                            | Median 21 mo [range 1-144]                                                       |
| Lagos-Arevalo (2015) | Govt. NGO          | Prospective cohort                                  | Canada         | 1 | 2007-2010 | PICU (non-cardiac only)                     | Chart review, Prospective data collection, EMR query | 160  | Consecutive                      | Infants<br>Children<br>Adolescents             | AKI: Mean 4 (5.5); nonAKI: Mean 5.3 (5.8)                                        |
| Lee (2017)           | NR                 | Retrospective cohort                                | Korea          | 1 | 2011-2011 | PCICU (cardiac only)                        | Chart review                                         | 135  | Consecutive                      | Neonates<br>Infants<br>Children<br>Adolescents | Mean 480.01 (903.86) days                                                        |
| Lex (2014)           | NR                 | Prospective cohort                                  | Hungary        | 1 | 2004-2008 | PCICU (cardiac only)                        | Prospective data collection                          | 1489 | Consecutive                      | Neonates<br>Infants<br>Children<br>Adolescents | Median 488 days [IQR 177, 2124]                                                  |
| Li (2016)            | NGO                | Prospective cohort                                  | China          | 1 | 2011-2012 | Other (PICU, but composition not specified) | Prospective data collection                          | 370  | Consecutive                      | Infants<br>Children<br>Adolescents             | Median [IQR] 11 [3-33] mo and 14 [7-26] mo                                       |
| Liu (2009)           | NR                 | Prospective cohort                                  | USA            | 1 | 2004-2004 | PCICU (cardiac only)                        | Prospective data collection                          | 71   | Consecutive                      | Neonates<br>Infants<br>Children<br>Adolescents | No AKI mean 2.1 yr (2), AKI 3 yr (5.2)                                           |
| Lombel (2012)        | Other (No funding) | Retrospective cohort                                | USA of America | 1 | 2004-2009 | PICU (non-cardiac only)                     | Chart review                                         | 21   | Consecutive                      | Children<br>Adolescents                        | Median 51 mo [IQR 42, 67]                                                        |
| MacDonald (2016)     | Govt.              | Prospective cohort, Observational/                  | Canada         | 1 | 2001-2012 | PCICU (cardiac only)                        | Prospective data collection                          | 66   | Consecutive                      | Neonates<br>Infants<br>Children                | NR                                                                               |

|                    |                  |                                                     |                |   |           |                                                                                                                  |                             |                                 |                        |                                                |                                                                         |
|--------------------|------------------|-----------------------------------------------------|----------------|---|-----------|------------------------------------------------------------------------------------------------------------------|-----------------------------|---------------------------------|------------------------|------------------------------------------------|-------------------------------------------------------------------------|
|                    |                  | descriptive study                                   |                |   |           |                                                                                                                  |                             |                                 |                        |                                                |                                                                         |
| Martin (2013)      | NR               | Prospective cohort, Observational/descriptive study | Argentina      | 1 | 2005-2009 | PICU (non-cardiac only)                                                                                          | Prospective data collection | 1496                            | Consecutive            | Infants<br>Children<br>Adolescents             | Median 2.4 [0.08-17.7] yr                                               |
| Mathur (2006)      | NR               | Case/control study (case matched)                   | India          | 1 | 2003-2003 | Other (Nursery)                                                                                                  | Chart review                | 200                             | NR/Unable to determine | Neonates                                       | Mean GA 36.5 wks                                                        |
| Matics (2017)      | NR               | Retrospective cohort                                | USA            | 1 | 2009-2016 | Mixed PICU (cardiac and non-cardiac)                                                                             | EMR query                   | 8711                            | Consecutive            | Neonates<br>Infants<br>Children<br>Adolescents | Survivors, median: 69 mo [IQR 17-156]; non-survivors: 43 mo [IQR 8-144] |
| Mccaffrey (2015)   | NR               | Prospective cohort                                  | United Kingdom | 1 | 2011-2012 | PICU (non-cardiac only)                                                                                          | Prospective data collection | 49                              | Consecutive            | Neonates<br>Infants<br>Children<br>Adolescents | Mean 3 yr, [range 0.04-15 yr]                                           |
| Meersch (2014)     | Govt.            | Prospective cohort                                  | Germany        | 1 | 2013-2013 | PCICU (cardiac only)                                                                                             | Prospective data collection | 51                              | Consecutive            | Neonates<br>Infants<br>Children<br>Adolescents | Mean 3 (0.5) and 1.5 (1) yr                                             |
| Menon (2016)       | Govt.            | Prospective cohort, Observational/descriptive study | USA            | 1 | 2012-2014 | PICU (non-cardiac only)                                                                                          | Prospective data collection | 184                             | Consecutive            | Infants<br>Children<br>Adolescents             | Median 7.7 [2.7, 14.9]                                                  |
| Mishra (2008)      | NGO              | Prospective cohort                                  | India          | 1 | 2006-2007 | Other (Not entirely clear: stated that patients were recruited from the "pediatric ward of a tertiary hospital") | Prospective data collection | 60                              | NR/Unable to determine | Neonates<br>Infants<br>Children                | Children with ARF: 39.2 (39.2) mo; children without ARF: 41.6 (40.5) mo |
| Mishra (2005)      | Govt. NGO        | Prospective cohort                                  | USA            | 1 | 2004-2004 | PCICU (cardiac only)                                                                                             | Prospective data collection | 71                              | Consecutive            | Neonates<br>Infants<br>Children                | Median 2.1 yr [1-2] for the AKI group                                   |
| Neunhoeffer (2016) | Other (Unfunded) | Prospective cohort                                  | Germany        | 1 | 2013-2014 | PCICU (cardiac only)                                                                                             | Prospective data collection | 50                              | NR/Unable to determine | Neonates<br>Infants                            | Median [IQR] 4 [0.1-10.8] and 0.5 [0.25-2.3] mo                         |
| Nguyen (2005)      | Govt. NGO        | Prospective cohort                                  | USA            | 1 | 2004-2004 | PCICU (cardiac only)                                                                                             | Prospective data collection | 15 cases and 15 matched control | Consecutive            | Neonates<br>Infants<br>Children<br>Adolescents | NR                                                                      |
| Ormeçi (2015)      | NR               | Prospective cohort                                  | Turkey         | 1 | 2012-2014 | PCICU (cardiac only)                                                                                             | Prospective data collection | 37                              | NR/Unable to determine | Neonates<br>Infants                            | NR                                                                      |

|                          |                 |                                                       |                        |   |           |                                      |                             |                       |                        |                                                |                                                                                    |
|--------------------------|-----------------|-------------------------------------------------------|------------------------|---|-----------|--------------------------------------|-----------------------------|-----------------------|------------------------|------------------------------------------------|------------------------------------------------------------------------------------|
| Palermo (2017)           | Govt.           | Prospective cohort, Observational/descriptive study   | Canada                 | 4 | 2013-2014 | PICU (non-cardiac only)              | Prospective data collection | 81                    | Consecutive            | Neonates<br>Infants<br>Children<br>Adolescents | No AKI 7.7 yr (6.2); AKI 10.7 yr (5.9)                                             |
| Palmieri (2009)          | NR              | Retrospective cohort                                  | USA                    | 1 | 2006-2008 | PICU (non-cardiac only)              | Prospective data collection | 123                   | Consecutive            | Infants<br>Children<br>Adolescents             | No acute kidney injury: Mean 7.4 (5.4) yr; Acute Kidney Injury: Mean 6.74 (5.4) yr |
| Parikh (2013)            | Govt., Industry | Prospective cohort                                    | Canada, USA            | 3 | 2007-2009 | PCICU (cardiac only)                 | Prospective data collection | 311                   | Consecutive            | Infants<br>Children<br>Adolescents             | Stage 2 AKI median 0.7 [0.4, 3.7]; no Stage 2 AKI 2.9 [0.5, 5.6]                   |
| Park (2016)              | NR              | Prospective cohort, Observational/descriptive study   | South Korea            | 1 | 2012-2012 | PCICU (cardiac only)                 | Chart review, EMR query     | 220                   | Consecutive            | Neonates<br>Infants<br>Children                | Most under 12 mo, split by AKI, 8 or 3 mo median age ranges                        |
| Peco-Antić (2013)        | NR              | Prospective cohort                                    | Serbia                 | 1 | 2011-2011 | PCICU (cardiac only)                 | Prospective data collection | 112                   | Consecutive            | Neonates<br>Infants<br>Children                | Median age 1.6 [IQR: 0.4-4.7]                                                      |
| Penk (2019)              | NR              | Retrospective cohort                                  | USA                    | 4 | 2015-2017 | PCICU (cardiac only)                 | Chart review                | 166                   | Convenience            | Neonates<br>Infants<br>Children<br>Adolescents | 6.4 [0.6-27.2]                                                                     |
| Plotz (2008)             | NR              | Retrospective cohort                                  | The Netherlands        | 1 | 2002-2006 | PICU of unknown composition          | EMR query                   | 103                   | Consecutive            | Infants<br>Children<br>Adolescents             | 4.5 yr [1 mo – 17 yr]                                                              |
| Polat (2013)             | NR              | Prospective cohort                                    | NR/Unable to determine | 1 | NR        | PICU of unknown composition          | Prospective data collection | 32                    | NR/Unable to determine | Neonates<br>Infants<br>Children<br>Adolescents | Mean 105 (71.7) mo                                                                 |
| Portilla (2008)          | Govt. NGO       | Prospective cohort                                    | USA                    | 1 | NR        | PCICU (cardiac only)                 | Prospective data collection | 40                    | Consecutive            | Neonates<br>Infants<br>Children<br>Adolescents | No AKI (n=19) 4.3 yr (1.3); AKI (n=21) 2.7 yr (0.8)                                |
| Prasetyo (2016)          | NR              | Prospective cohort                                    | Indonesia              | 1 | 2014-2014 | Mixed PICU (cardiac and non-cardiac) | Prospective data collection | 56                    | Consecutive            | Infants<br>Children<br>Adolescents             | Mean 49.7 mo (46.2)                                                                |
| Raggal (2013)            | Other (None)    | Case/control study (case matched), Prospective cohort | Egypt                  | 1 | 2008-2009 | Other (NICU)                         | Prospective data collection | 30 cases, 20 controls | Consecutive            | Neonates                                       | First 2 days of life                                                               |
| Ramesh (2010)            | NR              | Prospective cohort                                    | USA                    | 1 | 2006-2007 | PCICU (cardiac only)                 | Prospective data collection | 60                    | NR/Unable to determine | Neonates<br>Infants<br>Children<br>Adolescents | Mean (SD) 4.3 (4.5) and 4.0 (4.6) yr                                               |
| Raymakers-Janssen (2019) | NGO             | Retrospective cohort                                  | The Netherlands        | 8 | 2006-2017 | PICU of unknown composition          | Chart review, Registry      | 68                    | Consecutive            | Neonates<br>Infants<br>Children<br>Adolescents | Median 8.9 [3.3, 8.9] yr                                                           |

|                          |     |                                           |              |   |           |                                      |                             |                           |                                                                                                 |                                                |                                                                        |
|--------------------------|-----|-------------------------------------------|--------------|---|-----------|--------------------------------------|-----------------------------|---------------------------|-------------------------------------------------------------------------------------------------|------------------------------------------------|------------------------------------------------------------------------|
| Ricci (2012)             | NR  | Prospective cohort, Cross-sectional study | Italy        | 1 | NR        | PCICU (cardiac only)                 | Prospective data collection | 160                       | Consecutive                                                                                     | Neonates<br>Infants                            | Mean 134 days (117)                                                    |
| Ricci (2012)             | NR  | Prospective cohort                        | Italy        | 1 | NR        | PICU of unknown composition          | Prospective data collection | 10                        | Other (Convenience sample of patients with congenital heart disease on ECMO)                    | Neonates<br>Infants<br>Children<br>Adolescents | CVVH pts median 31 days [7-5008], not CVVH its median 13 days [9-3056] |
| Ricci (2013)             | NR  | Prospective cohort                        | Italy        | 1 | 2010-2011 | PCICU (cardiac only), Other (CPB)    | Prospective data collection | 160                       | Consecutive                                                                                     | Neonates<br>Infants                            | Mean 134 (117) days                                                    |
| Riyuzo (2016)            | NR  | Retrospective cohort                      | Brazil       | 1 | 1990-1994 | PICU (non-cardiac only)              | Chart review                | 77                        | Other (Sepsis and AKI as filters (based on creatinine elevation method by Guignard and Santos)) | Infants<br>Children<br>Adolescents             | Mean 12.8 (23.5) mo                                                    |
| Roy (2019)               | NR  | Retrospective cohort                      | USA          | 1 | NR        | PICU (non-cardiac only)              | Chart review                | 157                       | Consecutive                                                                                     | Infants<br>Children<br>Adolescents             | NR                                                                     |
| Rustagi (2017)           | NR  | Prospective cohort                        | India        | 1 | 2009-2009 | Mixed PICU (cardiac and non-cardiac) | Prospective data collection | 380                       | Consecutive                                                                                     | Infants<br>Children<br>Adolescents             | Median 4.86 yr (range 2 mo - 18 yr)                                    |
| Sadeghi-Bojd (2015)      | NGO | Prospective cohort                        | Iran         | 1 | 2012-2014 | Mixed PICU (cardiac and non-cardiac) | Prospective data collection | 303                       | NR/Unable to determine                                                                          | Neonates<br>Infants<br>Children<br>Adolescents | Mean 2.96 (3.76)                                                       |
| Safdar (2016)            | NGO | Prospective cohort                        | Saudi Arabia | 1 | 2013-2013 | PICU (non-cardiac only)              | Prospective data collection | 62                        | Consecutive                                                                                     | Neonates<br>Infants<br>Children<br>Adolescents | AKI (n=32) Median 18 mo [8-42], no AKI (n=30) 20.5 mo [6-54]           |
| Saleh (2017)             | NR  | Prospective cohort                        | Egypt        | 1 | 2015-2016 | PICU (non-cardiac only)              | Prospective data collection | 120 patients, 40 controls | Consecutive                                                                                     | Infants<br>Children<br>Adolescents             | Median 21 mo [IQR 1.5-180]                                             |
| Sanchez-de-Toledo (2016) | NR  | Retrospective cohort                      | Spain        | 1 | 2010-2012 | PCICU (cardiac only)                 | Chart review                | 480                       | Consecutive                                                                                     | Neonates<br>Infants<br>Children<br>Adolescents | Mean 3.3 (0.6) yr                                                      |
| Sanchez-Pinto (2016)     | NR  | Retrospective cohort                      | USA          | 1 | 2003-2015 | PICU (non-cardiac only)              | EMR query                   | 9396                      | Consecutive                                                                                     | Neonates<br>Infants<br>Children<br>Adolescents | Median 7.3 yr [1.7-13.6]                                               |

|                      |                    |                                                                                             |                |   |           |                                                           |                                                                                                   |      |                                                                          |                                                |                                                                                   |
|----------------------|--------------------|---------------------------------------------------------------------------------------------|----------------|---|-----------|-----------------------------------------------------------|---------------------------------------------------------------------------------------------------|------|--------------------------------------------------------------------------|------------------------------------------------|-----------------------------------------------------------------------------------|
| Sanchez-Pinto (2015) | NR                 | Retrospective cohort                                                                        | USA            | 1 | 2003-2012 | PICU (non-cardiac only)                                   | EMR query                                                                                         | 8260 | Consecutive                                                              | Infants<br>Children<br>Adolescents             | Non AKI: median 7.4 yr [IQR: 1.8, 13.6], AKI: 6.7 yr [1.6, 13.9]                  |
| Santiago (2010)      | Govt.              | Observational/descriptive study                                                             | Spain          | 1 | 1996-2009 | Mixed PICU (cardiac and non-cardiac)                      | Prospective data collection                                                                       | 174  | Consecutive                                                              | Neonates<br>Infants<br>Children<br>Adolescents | Mean 52.3 mo (63.8)                                                               |
| Scheider (2010)      | NR                 | Retrospective cohort                                                                        | USA            | 1 | 2003-2007 | PICU of unknown composition                               | EMR query                                                                                         | 3396 | Consecutive                                                              | Infants<br>Children<br>Adolescents             | Survivors: Median 7.5 yr [IQR 1.9, 13.4];<br>Nonsurvivors: 4.3 yr [IQR 0.9, 12.2] |
| Schroeder (2019)     | Govt.              | Retrospective cohort                                                                        | USA            | 1 | 2007-2009 | PCICU (cardiac only)                                      | Prospective data collection                                                                       | 63   | Consecutive                                                              | Neonates                                       | 7 days [6.0, 8.5]                                                                 |
| Seguin (2014)        | NGO                | Retrospective cohort                                                                        | Canada         | 1 | 2005-2007 | PCICU (cardiac only)                                      | Chart review, Registry                                                                            | 193  | NR/Unable to determine                                                   | Neonates<br>Infants<br>Children<br>Adolescents | Mean 2.6 (4.2) yr                                                                 |
| Seitz (2013)         | Industry           | Prospective cohort                                                                          | Germany        | 1 | 2010-2011 | PCICU (cardiac only)                                      | Chart review, Prospective data collection                                                         | 139  | Consecutive                                                              | Neonates<br>Infants<br>Children<br>Adolescents | Mean 4.8 yr, median 0.9 yr [range 1 day to 44 yr, IQR 0.3-7.7 yr]                 |
| Selewski (2012)      | Other (No funding) | Retrospective cohort                                                                        | USA of America | 1 | 2006-2010 | PICU (non-cardiac only), PCICU (cardiac only)             | Chart review                                                                                      | 53   | Consecutive                                                              | Neonates<br>Infants<br>Children<br>Adolescents | Median 0 mo [ IQR 0, 10 mo]                                                       |
| Selewski (2011)      | Other (Not funded) | Retrospective cohort                                                                        | USA of America | 1 | 2006-2010 | Mixed PICU (cardiac and non-cardiac)                      | Chart review                                                                                      | 113  | Consecutive                                                              | Neonates<br>Infants<br>Children<br>Adolescents | Median 19 mo [IQR 0.2, 181 mo]                                                    |
| Selewski (2014)      | NGO                | Retrospective cohort                                                                        | USA            | 1 | 2011-2013 | Mixed PICU (cardiac and non-cardiac)                      | Other (Institutional database)                                                                    | 3009 | Other (ICU discharges identified from institutional database)            | Neonates<br>Infants<br>Children<br>Adolescents | Median 4 yr [range 0, 13]                                                         |
| Selistre (2012)      | NR                 | Retrospective cohort, Other (This study does not really qualify per our inclusion criteria) | France         | 1 | 2003-2010 | Other (Selected from patients with measured GFR (inulin)) | Retrospective cohort from a prospectively consented cohort. The data collection method is unclear | 751  | Other (Patients selected from mGFR cohort. Exclusion criteria not clear) | Adolescents                                    | Median 17.0 [13.0-21.0]                                                           |
| Sethi (2018)         | NR                 | Prospective cohort, Observational/descriptive study                                         | NR             | 1 | 2013-2014 | NR/Unable to determine                                    | Chart review, Prospective data collection                                                         | 102  | Consecutive                                                              | Neonates<br>Infants<br>Children<br>Adolescents | Mean 6.5 (5.9) mo                                                                 |
| Shalaby (2014)       | Other (None)       | Retrospective cohort                                                                        | Saudi Arabia   | 1 | 2011-2011 | PICU (non-cardiac only)                                   | Chart review                                                                                      | 281  | Consecutive                                                              | Infants<br>Children<br>Adolescents             | AKI (n=102) 43.1 mo (50.4); non-AKI (n=179) 50.7mo (53.4)                         |

|                   |                  |                      |        |    |           |                                                                      |                             |        |                                |                                                |                                                                                                                                       |
|-------------------|------------------|----------------------|--------|----|-----------|----------------------------------------------------------------------|-----------------------------|--------|--------------------------------|------------------------------------------------|---------------------------------------------------------------------------------------------------------------------------------------|
| Shi (2018)        | Govt.            | Prospective cohort   | China  | 1  | 2012-2013 | PCICU (cardiac only)                                                 | Prospective data collection | 67     | Consecutive                    | Neonates<br>Infants<br>Children                | Mean 8.4 (6.4) mo                                                                                                                     |
| Shime (2001)      | NR               | Retrospective cohort | Japan  | 1  | 1998-1999 | PCICU (cardiac only)                                                 | Registry                    | 142    | Consecutive                    | Neonates<br>Infants<br>Children<br>Adolescents | Median [range] 1 yr 1 mo [5 days-17 yr]                                                                                               |
| Sinitksy (2015)   | NR               | Retrospective cohort | USA    | 1  | 2009-2013 | PICU (non-cardiac only)                                              | Chart review                | 100    | Other (Ventilated at 48 hours) | Infants<br>Children<br>Adolescents             | Median 1.05 yr [0.3-4]                                                                                                                |
| Soler (2013)      | Govt.            | Prospective cohort   | USA    | 1  | 2009-2010 | PICU (non-cardiac only)                                              | Prospective data collection | 266    | Consecutive                    | Infants<br>Children<br>Adolescents             | Mean 7 (6) yr                                                                                                                         |
| Soni (2015)       | Other (Unfunded) | Retrospective cohort | USA    | 1  | 2010-2012 | PCICU (cardiac only)                                                 | Chart review                | 410    | Consecutive                    | Neonates<br>Infants<br>Children<br>Adolescents | Mean 23-24 mo [40-45] *age only listed for AKI and no AKI subgroups rather than whole cohort                                          |
| SooHoo (2018)     | Other (None)     | Retrospective cohort | USA    | 1  | 2009-2015 | PCICU (cardiac only)                                                 | Chart review                | 95     | Consecutive                    | Neonates                                       | Median 5 days                                                                                                                         |
| Stanski (2019)    | NR               | Prospective cohort   | NR     | 1  | 2014-2015 | PICU (non-cardiac only)                                              | Prospective data collection | 178    | Convenience                    | Infants<br>Children<br>Adolescents             | Median 6.7 yr                                                                                                                         |
| Sugimoto (2016)   | NGO              | Prospective cohort   | Japan  | 1  | 2010-2012 | PCICU (cardiac only)                                                 | Prospective data collection | 376    | Consecutive                    | Infants<br>Children<br>Adolescents             | NR if values were median or means: no AKI 32 mo, Risk 17 mo, Injury 11.5 mo, Failure 8 mo, p=0.0002 for differences across categories |
| Sutherland (2015) | Other (Unfunded) | Retrospective cohort | USA    | 1  | 2006-2010 | Mixed PICU (cardiac and non-cardiac), Hospital floor outside the ICU | EMR query                   | 14,795 | Consecutive                    | Infants<br>Children<br>Adolescents             | Median 6.7 yr [IQR 1.95 - 14.11]                                                                                                      |
| Sutherland (2010) | Govt. NGO        | Prospective cohort   | USA    | 13 | 2001-2005 | Mixed PICU (cardiac and non-cardiac)                                 | Prospective data collection | 297    | Consecutive                    | Neonates<br>Infants<br>Children<br>Adolescents | Mean 8.5 yr (7.0)                                                                                                                     |
| Symons (2007)     | NR               | Prospective cohort   | USA    | 13 | 2001-2005 | Mixed PICU (cardiac and non-cardiac)                                 | Prospective data collection | 344    | Consecutive                    | Neonates<br>Infants<br>Children<br>Adolescents | Not provided. Only that 80% >1 yr old; 10% less than 1 mo old and 10% 1 mo to 1 yr old                                                |
| Tanyildiz (2017)  | NR               | Retrospective cohort | Turkey | 1  | 2009-2011 | PICU (non-cardiac only), PCICU (cardiac only)                        | Chart review                | 137    | Consecutive                    | Infants<br>Children<br>Adolescents             | Mean 36.6 (43.3) mo                                                                                                                   |



|                                          |                                                                                                       |                                                         |        |   |           |                                        |                             |                            |                        |                                                |                                                                                             |
|------------------------------------------|-------------------------------------------------------------------------------------------------------|---------------------------------------------------------|--------|---|-----------|----------------------------------------|-----------------------------|----------------------------|------------------------|------------------------------------------------|---------------------------------------------------------------------------------------------|
| Thakkar (2018)                           | Other (None)                                                                                          | Prospective cohort                                      | India  | 1 | 2013-2013 | PICU of unknown composition            | Prospective data collection | 115                        | NR/Unable to determine | Infants<br>Children                            | NR                                                                                          |
| Torres de Melo Bezerra Cavalcante (2016) | Govt.                                                                                                 | Prospective cohort                                      | Brazil | 1 | 2013-2014 | PCICU (cardiac only)                   | Prospective data collection | 289                        | Consecutive            | Neonates<br>Infants<br>Children<br>Adolescents | Mean 3 yr (4.4)                                                                             |
| Ueno (2019)                              | NR                                                                                                    | Retrospective cohort                                    | Japan  | 1 | 2010-2018 | PCICU (cardiac only)                   | Chart review                | 81                         | Consecutive            | Neonates                                       | Median 15 days [0-26] AKI and 18 [7-26] no AKI                                              |
| Vaewpanich (2019)                        | NR                                                                                                    | Case/control study (case matched, Retrospective cohort) | USA    | 1 | 2012-2014 | PICU (non-cardiac only)                | Chart review, EMR query     | 42                         | Random                 | Infants<br>Children<br>Adolescents             | Median 1.22 [0.48, 10.4]                                                                    |
| Valentine (2012)                         | Govt. NGO                                                                                             | Retrospective cohort                                    | USA    | 5 | 2007-2010 | PICU of unknown composition            | EMR query, Registry         | NR                         | Consecutive            | Infants<br>Children<br>Adolescents             | Median 3 [IQR 0.8-11] yr                                                                    |
| Vassalos (2011)                          | NGO, Other ("The Association of Children with Heart Disorders", nature of funding body not disclosed) | Prospective cohort                                      | UK     | 1 | NR        | PCICU (cardiac only), Other (CPB only) | Prospective data collection | 20                         | NR/Unable to determine | Infants                                        | Range 4-58 mo                                                                               |
| Volovelsky (2018)                        | Govt.                                                                                                 | Prospective cohort                                      | USA    | 1 | 2016-2017 | PCICU (cardiac only)                   | Prospective data collection | 76                         | NR/Unable to determine | Neonates<br>Infants<br>Children<br>Adolescents | Median 0.7 [0.3, 4.7]                                                                       |
| Volpon (2015)                            | NR                                                                                                    | Prospective cohort                                      | Brazil | 1 | 2011-2012 | PICU of unknown composition            | Prospective data collection | 122                        | Consecutive            | Neonates<br>Infants<br>Children<br>Adolescents | Median age for those who got AKI: 5.8 [0-163] mo; Those that did not get AKI: 65 [5-215] mo |
| Volpon (2016)                            | NR                                                                                                    | Prospective cohort                                      | Brazil | 1 | 2011-2012 | Mixed PICU (cardiac and non-cardiac)   | Prospective data collection | 160                        | Consecutive            | NR/Unable to determine                         | Median 32 [range 0-241] mo                                                                  |
| Wai (2013)                               | Govt.                                                                                                 | Case/control study (case matched)                       | USA    | 1 | NR        | PCICU (cardiac only)                   | Prospective data collection | 60 (39 cases, 21 controls) | Consecutive            | Neonates<br>Infants<br>Children<br>Adolescents | Cases (n=39) Mean 7.5 yr (6.97)                                                             |
| Wang (2017)                              | Govt.                                                                                                 | Retrospective cohort                                    | USA    | 1 | 2011-2012 | Mixed PICU (cardiac and                | EMR query                   | 1332 for ICU               | NR/Unable to determine | Infants<br>Children                            | Median 4.4 [IQR 0.9-12] yr                                                                  |

|                 |                                                                                                                                 |                       |         |    |           |                                                                                                     |                             |                                                                           |             |                                                |                                                                             |
|-----------------|---------------------------------------------------------------------------------------------------------------------------------|-----------------------|---------|----|-----------|-----------------------------------------------------------------------------------------------------|-----------------------------|---------------------------------------------------------------------------|-------------|------------------------------------------------|-----------------------------------------------------------------------------|
|                 |                                                                                                                                 |                       |         |    |           | non-cardiac), Hospital floor outside the ICU                                                        |                             | patients (the investigators did a separate analysis for non-ICU patients) |             | Adolescents                                    |                                                                             |
| Washburn (2008) | Govt.                                                                                                                           | Prospective cohort    | USA     | 1  | NR        | PICU (non-cardiac only)                                                                             | Prospective data collection | 137                                                                       | Consecutive | Infants<br>Children<br>Adolescents             | Mean 6.5 (6.4)                                                              |
| Westhoff (2016) | Govt.                                                                                                                           | Cross-sectional study | Germany | 1  | 2011-2015 | NR/Unable to determine                                                                              | Chart review                | 141                                                                       | Consecutive | Neonates<br>Infants<br>Children<br>Adolescents | Median [IQR] 2.6 [0.3-7.1], 0.6 [0-10], 2.4 [0.6-6.5], and 6 [0-9] yr       |
| Westhoff (2015) | Industry                                                                                                                        | Prospective cohort    | Germany | 1  | 2011-2014 | Other (Hospitalized children including NICU, patients referred to clinic, ICU controls without AKI) | Prospective data collection | 193                                                                       | Convenience | Neonates<br>Infants<br>Children<br>Adolescents | Median 3.4 yr [IQR 0-9]                                                     |
| Westhoff (2017) | Govt.                                                                                                                           | Prospective cohort    | Germany | 1  | 2011-2015 | PICU (non-cardiac only), Hospital floor outside the ICU, Other (Clinic)                             | Prospective data collection | 55 pts w/ AKI, 27 pts w/ no AKI                                           | Convenience | Neonates<br>Infants<br>Children<br>Adolescents | AKI median 0.9 yr [0 to 7.3], No AKI 2.4 [0.6 to 6.5]                       |
| Wheeler (2008)  | Govt., NGO, Other (This study primarily looks at predictive ability of serum NGAL on ICU admission for AKI, though mortality is | Prospective cohort    | USA     | 15 | NR        | Mixed PICU (cardiac and non-cardiac)                                                                | Prospective data collection | 168                                                                       | Consecutive | Neonates<br>Infants<br>Children                | Controls 0.2 y [0, 5.9], SIRS 3.5 y [1.8, 7]; septic shock 2.2 y [0.8, 6.2] |

|                   |                   |                                                       |             |    |           |                                                                                                          |                                                                 |                                         |                                                                                              |                                                |                                                                                                                                                         |
|-------------------|-------------------|-------------------------------------------------------|-------------|----|-----------|----------------------------------------------------------------------------------------------------------|-----------------------------------------------------------------|-----------------------------------------|----------------------------------------------------------------------------------------------|------------------------------------------------|---------------------------------------------------------------------------------------------------------------------------------------------------------|
|                   | reported as well) |                                                       |             |    |           |                                                                                                          |                                                                 |                                         |                                                                                              |                                                |                                                                                                                                                         |
| Wilder (2016)     | Govt. NGO         | Retrospective cohort                                  | USA         | 1  | 2006-2010 | PCICU (cardiac only)                                                                                     | EMR query                                                       | 435                                     | NR/Unable to determine                                                                       | Neonates                                       | NR                                                                                                                                                      |
| Wong (2015)       | Govt.             | Retrospective cohort                                  | USA         | 16 | NR        | PICU of unknown composition                                                                              | Registry                                                        | Derivation – 241, validation – 200      | Other (Derivation cohort – not reported, validation cohort – random selection from database) | Neonates<br>Infants<br>Children                | Derivation cohort - median [IQR] 2.5 [0.8-5.9] yr                                                                                                       |
| Xu (2018)         | Govt. NGO         | Retrospective cohort                                  | China       | 25 | 2013-2015 | Other (Hospitalized children (including children in PICUs), excluded children with any AKI risk factors) | Other (Secondary analysis of dataset from prior research study) | 102,817                                 | NR/Unable to determine                                                                       | Infants<br>Children<br>Adolescents             | Median 4.8 yr                                                                                                                                           |
| Yavuz (2014)      | NGO               | Case/control study (case-matched)                     | Turkey      | 1  | 2009-2011 | Other (Burn ICU)                                                                                         | Prospective data collection                                     | 43 (22 burn, 21 controls)               | Consecutive                                                                                  | Neonates<br>Infants<br>Children<br>Adolescents | Burned + No AKI (n=16) 2 yr [1-6]; Burned + AKI (n=6) 4 yr [2-6]; Controls (n=21) 3.5 yr [2-5.5]                                                        |
| Yoneyama (2019)   | NGO, NR           | Case/control study (case-matched), Prospective cohort | Japan       | 1  | 2017-2018 | PCICU (cardiac only)                                                                                     | Prospective data collection                                     | 103                                     | Consecutive                                                                                  | Neonates<br>Infants<br>Children<br>Adolescents | Mean 54.3 (74.9) mo                                                                                                                                     |
| Youssef (2013)    | NR                | Case/control study                                    | Egypt       | 1  | NR        | PICU of unknown composition                                                                              | Prospective data collection                                     | 60 PICU patients, 15 healthy volunteers | NR/Unable to determine                                                                       | Infants<br>Children                            | PICU patients median 9 mo [range 1-108] mo; healthy volunteers median 6 mo [range 1-29] mo                                                              |
| Zappitelli (2015) | Govt. NGO         | Prospective cohort                                    | Canada, USA | 3  | 2007-2009 | PCICU (cardiac only)                                                                                     | Prospective data collection                                     | 287                                     | Consecutive                                                                                  | Infants<br>Children<br>Adolescents             | By categories of no post-op AKI at all, AKI by SCr only, AKI by CysC only, AKI by both SCr and CysC: Mean 4.8 (4.7), 3.0 (4.1), 5.4 (5.1), 1.9 (3.8) yr |
| Zappitelli (2012) | Govt. Industry    | Prospective cohort                                    | Canada, USA | 3  | 2007-2009 | PCICU (cardiac only)                                                                                     | Prospective data collection                                     | 294                                     | Consecutive                                                                                  | Infants<br>Children<br>Adolescents             | In 1 mo to 2 yr olds, across three increasing urine ACr                                                                                                 |

|                   |           |                                                     |                 |    |           |                                      |                             |     |             |                                                |                                                                                                                                               |
|-------------------|-----------|-----------------------------------------------------|-----------------|----|-----------|--------------------------------------|-----------------------------|-----|-------------|------------------------------------------------|-----------------------------------------------------------------------------------------------------------------------------------------------|
|                   |           |                                                     |                 |    |           |                                      |                             |     |             |                                                | categories, mean age was 0.69 (0.45), 0.50 (0.35), 0.49 (0.38) yr; In > 2 yr olds, similar age groups were 7.4 (3.8), 6.8 (4.4), 6.9 (4.7) yr |
| Zappitelli (2011) | Govt. NGO | Prospective cohort                                  | USA, Canada     | 3  | NR        | PCICU (cardiac only)                 | Prospective data collection | 288 | Consecutive | Infants<br>Children<br>Adolescents             | Mean 3.8 (4.5)                                                                                                                                |
| Zappitelli (2009) | Govt. NGO | Retrospective cohort                                | Canada          | 1  | 2002-2007 | PCICU (cardiac only)                 | Chart review                | 390 | Consecutive | Neonates<br>Infants<br>Children<br>Adolescents | Mean 2.8 (4.7)                                                                                                                                |
| Zappitelli (2007) | Govt.     | Prospective cohort                                  | USA             | 1  | NR        | PICU (non-cardiac only)              | Prospective data collection | 140 | Consecutive | Infants<br>Children<br>Adolescents             | Control, pRIFLE R, I and F: mean 8.5 (6.2), 5.9 (6.7), 4.4 (5.7), 6.6 (6.4)                                                                   |
| Zheng (2013)      | NR        | Prospective cohort                                  | China           | 1  | 2010-2011 | PICU of unknown composition          | Prospective data collection | 58  | Consecutive | Neonates<br>Infants<br>Children                | NR                                                                                                                                            |
| Zinter (2020)     | Govt. NGO | Retrospective cohort                                | USA, Canada     | >4 | 2009-2014 | PICU of unknown composition          | Registry                    | 936 | Consecutive | Infants<br>Children<br>Adolescents             | Median 8 [IQR 2-14]                                                                                                                           |
| Zwiers (2015)     | Industry  | Prospective cohort, Observational/descriptive study | The Netherlands | 1  | 2010-2013 | Mixed PICU (cardiac and non-cardiac) | Prospective data collection | 31  | Consecutive | Neonates<br>Infants                            | Median 5.6 days [IQR 2.2 - 39.9]                                                                                                              |

Abbreviations: Govt., government; NGO, nongovernmental organization; NR, not reported; PICU, pediatric intensive care unit; PCICU, pediatric cardiac intensive care unit; IQR, interquartile range; SD, standard deviation

<sup>a</sup>Neonates (0 to 30 days), Infants (31 days to < 1 year), Children (1 year to < 12 years), Adolescents (12 years to < 18 years)

<sup>b</sup>Data are presented as mean (SD) or median [IQR, range]

**Supplemental Table 2. Performance Characteristics for Assessment Tools and Scores for Renal Dysfunction in Critically Ill Children (n=192 studies)**

| Author (yr)         | Score/Assessment Tool                                      | Is this a study of score/tool derivation or validation?    | Inclusion criteria                                                                             | Time of score/tool assessment                               | Outcomes                                                                                 | Performance characteristics                                                                                                                                                                                                                                                                                                                                                                                                                                                                                                                                                                                                                                                                                                                                                                                                                                            |
|---------------------|------------------------------------------------------------|------------------------------------------------------------|------------------------------------------------------------------------------------------------|-------------------------------------------------------------|------------------------------------------------------------------------------------------|------------------------------------------------------------------------------------------------------------------------------------------------------------------------------------------------------------------------------------------------------------------------------------------------------------------------------------------------------------------------------------------------------------------------------------------------------------------------------------------------------------------------------------------------------------------------------------------------------------------------------------------------------------------------------------------------------------------------------------------------------------------------------------------------------------------------------------------------------------------------|
| Abulebda (2014)     | Other (Percent fluid overload)                             | Validation                                                 | Other (Children with septic shock)                                                             | First 24hr in PICU and cumulative over first 7 days in PICU | Mortality, Other (Complicated course (death within 28d or >=2 organ failures at 7 days)) | Other: Univariate OR only showed significant association between 7d %FO and mortality in low-risk patients                                                                                                                                                                                                                                                                                                                                                                                                                                                                                                                                                                                                                                                                                                                                                             |
| Afroz (2017)        | pRIFLE                                                     | Validation                                                 | Other (Special Care Baby Unit patients)                                                        | Unable to assess                                            | Mortality, Outcomes related to MODS, Other (LOS)                                         | Other: Higher MOF in I and F and longer LOS in F group, 27% mortality with AKI                                                                                                                                                                                                                                                                                                                                                                                                                                                                                                                                                                                                                                                                                                                                                                                         |
| Akcan-Arikan (2007) | pRIFLE                                                     | Validation                                                 | General PICU population (mixed cardiac and non-cardiac), General PICU population (non-cardiac) | Peak pRIFLE in PICU stay                                    | Mortality, Other (RRT, LOS hospital and ICU)                                             | NPV: Patients who remained free of AKI in the first 7 days did not receive RRT, p= 0.03<br>aOR: AKI during the PICU stay for 28 day mortality Using SCr + urine criteria aOR: any AKI during admission 1.1 (0.3-4.3), if no PRISM 1.4 (0.4-5.1) ; pRIFLEmax I or worse 1.9 (.7-5.1) , if no PRISM 1.7 (0.6-4.8).aOR for mortality AKI on admission with persistent AKI excluding PRISM 3.9 (1.4-10.6), AKI pRIFLE I or worse on admission with persistent AKI excluding PRISM 3.4 (1.2-9.8).<br>Other: pRIFLEmax I or F >2x mortality than pRIFLEmax R or controls (21 vs 8%, P<0.05); mortality 25.8% for pRIFLEmax F vs 10.9% for all others, P = 0.03 . aHR for LOS: AKI during the PICU stay (SCr+urine output): Any AKI during admission: hospital LOS 0.6 (0.4-0.9), PICU LOS 0.6 (0.4-0.9); pRIFLEmax I or F hospital LOS 0.6 (0.4-0.9), PICU LOS 0.7 (0.5-0.9) |
| Akcan-Arikan (2017) | pRIFLE, Other (FOKIS (Fluid overload kidney injury score)) | Validation                                                 | General PICU population (mixed cardiac and non-cardiac)                                        | At any point during PICU stay                               | Mortality, Organ-specific outcomes/residual morbidity, Other (Length of stay)            | aOR: FOKIS score OR for mortality = 1.45 (95%CI 1.35-1.56); FOKIS>7 OR 13.6 (95%CI 8.2-22) for mortality                                                                                                                                                                                                                                                                                                                                                                                                                                                                                                                                                                                                                                                                                                                                                               |
| Alcaraz (2013)      | pRIFLE                                                     | Other (Prediction of NGAL based on SCr change as standard) | PCICU population (only cardiac)                                                                | 72 hours to 7 days                                          | Mortality, Organ-specific outcomes/residual morbidity                                    | PPV: NGAL for AKI: 0.59-0.66<br>NPV: NGAL for AKI: 0.84-0.93<br>AUROC: NGAL for AKI: 0.69-0.83                                                                                                                                                                                                                                                                                                                                                                                                                                                                                                                                                                                                                                                                                                                                                                         |
| Ali (2013)          | Plasma biomarkers                                          | Validation                                                 | PCICU population (only cardiac)                                                                | Pre-operatively and post-op day 0 through 4                 | Other (Post-operative fluid balance, length of mechanical)                               | AUROC: Pre-op FGF levels for AKI 0.843 (95%CI 0.665-1.020)<br>aOR: FGF23>86RU/ml odds of AKI 2.0 (95%CI 1.076-3.717, p=0.033)<br>Other: Preop FGF23 correlation with post-op fluid balance (r=0.607, p=0.006); pre-op FGF23 correlation with LMV (r=0.8052, p<0.001) and LOS ICU (r=0.735, p<0.001)                                                                                                                                                                                                                                                                                                                                                                                                                                                                                                                                                                    |

|                  |                                                                                       |                                                                   |                                                                                                           |                                                             |                                                                                 |                                                                                                                                                                                                                                                                                                                                                                                                                                                                                                                                                        |
|------------------|---------------------------------------------------------------------------------------|-------------------------------------------------------------------|-----------------------------------------------------------------------------------------------------------|-------------------------------------------------------------|---------------------------------------------------------------------------------|--------------------------------------------------------------------------------------------------------------------------------------------------------------------------------------------------------------------------------------------------------------------------------------------------------------------------------------------------------------------------------------------------------------------------------------------------------------------------------------------------------------------------------------------------------|
|                  |                                                                                       |                                                                   |                                                                                                           |                                                             | ventilation, length of stay in the PICU)                                        |                                                                                                                                                                                                                                                                                                                                                                                                                                                                                                                                                        |
| Alkandari (2011) | AKIN                                                                                  | Validation                                                        | General PICU population (only non-cardiac), AKI of any cause, Patients receiving nephrotoxic medications) | Throughout PICU                                             | Mortality, Other (PICU LOS; duration of mechanical ventilation)                 | AUROC: Percent rise in SCr on PICU day 1 to predict AKI, AUROC=0.68<br>aOR: 3.7 (2.1-6.4) for AKI with PICU mortality; aOR 5.8 for Stage 2 AKI with PICU mortality;<br>Other: AKI and AKI stage 2 associated with longer PICU stay and mechanical ventilation (p<0.05 in multiple linear regression)                                                                                                                                                                                                                                                   |
| Amini (2017)     | pRIFLE                                                                                | Other (Epidemiology study of prevalence of AKI post-CPB)          | PCICU population only cardiac)                                                                            | Not specified, looks like within the first 3-4 days post-op | Mortality, Organ-specific outcomes/residual morbidity, Outcomes related to MODS | aOR: Log regression for AKI: duration of surgery aOR 1.05/10mins (95% CI 1.01-1.08); cyanotic heart disease aOR 1.97 (95%CI 1.15-3.2); lactate after operation (timing not specified) 1.14 (95% CI 1.03-1.3). No specification on what was included in the model in which the OR were adjusted.<br>Other: Proportion of subjects in each category of pRIFLE who died: None (2.7%), Risk (13%), Injury (28.6%), Failure (85.7%); p=0.01 in MWU comparison. Prevalence of AKI 28.9% of cohort.                                                           |
| Arikan (2012)    | Other (Fluid overload)                                                                | Other (Adjusted analysis of fluid overload and oxygenation index) | General PICU population (only non-cardiac), Other (Mechanically ventilated >24h and with arterial line)   | Daily                                                       | Other (oxygenation index)                                                       | Other: Determined the independent effect of fluid overload on oxygenation index after adjusting for PELOD score on the day of the measurement using regression analysis, only p values reported. Total fluid overload was associated with peak OI (p=0.03). Daily fluid overload associated with daily OI (p=0.009)                                                                                                                                                                                                                                    |
| Asilioglu (2012) | pRIFLE, Plasma biomarkers                                                             | Derivation                                                        | General PICU population (only non-cardiac)                                                                | Before day 7                                                | Organ-specific outcomes/residual morbidity                                      | Se: For EGFR as primary: SCr 24%, CysC: 81%<br>Sp: For EGFR as primary: SCr 98%, CysC: 96%<br>PPV: For EGFR as primary: SCr 91%, CysC: 94%<br>AUROC: For EGFR as primary: SCr 0.64, CysC: 0.93                                                                                                                                                                                                                                                                                                                                                         |
| Askenazi (2019)  | KDIGO                                                                                 | Validation                                                        | NR                                                                                                        | NICU                                                        | Mortality                                                                       | Se: Absolute Cr rise: 0.42; % Cr rise: 0.42; Absolute Cr and/or % Cr rise: 0.58<br>Sp: Absolute Cr rise: 0.87; % Cr rise: 0.80; Absolute Cr and/or % Cr rise: 0.80<br>PPV: Absolute Cr rise: 0.1; % Cr rise: 0.07; Absolute Cr and/or % Cr rise: 0.09<br>NPV: Absolute Cr rise: 0.98; % Cr rise: 0.98; Absolute Cr and/or % Cr rise: 0.98<br>LR: Absolute Cr rise: +LR 4.7 -LR 0.67; % Cr rise: +LR 1.7 -LR 0.73; Absolute Cr and/or % Cr rise: +LR 2.9 -LR 0.53<br>AUROC: Absolute Cr rise: 0.64; % Cr rise: 0.61; Absolute Cr and/or % Cr rise: 0.69 |
| Askenazi (2011)  | Other (Category complication code for for serum creatinine >1.5 mg/dL or Internationa | NR                                                                | General PICU population (only non-cardiac), AKI of any cause                                              | NR                                                          | Mortality                                                                       | aOR: For neonates: The adjusted odds of death given AKI in ECMO patients=3.2; 95% CI: 2.6-4.0, p=<.001. For neonates: The adjusted odds of death given RRT in ECMO patients=1.9; 95% CI: 1.6-2.2, p=<.001. For pediatric patients: The adjusted odds of death given AKI in ECMO patients=1.7; 95% CI: 1.3-2.3, p=<.001. For pediatric patients: The adjusted odds of death given RRT in ECMO patients=2.5; 95% CI: 1.9-3.2, p=<.001.                                                                                                                   |

|               |                                                                                                                                              |                                                                            |                                                         |                                                                          |                                                                                       |                                                                                                                                                                                                                                                                                                                                                                                                                                      |
|---------------|----------------------------------------------------------------------------------------------------------------------------------------------|----------------------------------------------------------------------------|---------------------------------------------------------|--------------------------------------------------------------------------|---------------------------------------------------------------------------------------|--------------------------------------------------------------------------------------------------------------------------------------------------------------------------------------------------------------------------------------------------------------------------------------------------------------------------------------------------------------------------------------------------------------------------------------|
|               | I Statistical Classification of Diseases and Health Problems, Revision 9 (ICD-9) code for acute renal failure and renal replacement therapy) |                                                                            |                                                         |                                                                          |                                                                                       |                                                                                                                                                                                                                                                                                                                                                                                                                                      |
| Aygun (2018)  | pRIFLE                                                                                                                                       | Other (NR)                                                                 | General PICU population (mixed cardiac and non-cardiac) | Anytime                                                                  | Mortality, Other (Length of PICU stay)                                                | aOR: Not aOR, OR for mortality 3.408 0.003 - 0.175 but reported as significant, so I am guessing there is some mistake<br>Other: Mean duration of ICU stay was 10.66 ± 10.55 days with AKI vs 8.31 ± 6.46 days without AKI.                                                                                                                                                                                                          |
| Bai (2018)    | Urine biomarkers, Plasma biomarkers                                                                                                          | Other (Biomarker prediction of AKI via AKIN at 120hr after PICU admission) | General PICU population (mixed cardiac and non-cardiac) | Serum and urinary levels of FGF23 and IGFBP-7 within 24 hrs of admission | Organ-specific outcomes/residual morbidity, Other (AKI via AKIN criteria without UOP) | AUROC: To predict severe AKI (AKIN stage 2 and 3): sCysC 0.89 (95%CI 0.84-0.99); uCysC 0.88 (95%CI 0.76-0.99); uIGFBP-7 0.79 (95%CI 0.66-0.92); uIGFBP-7 & sCysC 0.89 (95%CI 0.79-0.99); uIGFBP-7 & uCysC 0.88 (0.79-0.98); uIGFBP-7 & uCysC & sCysC 0.90 (95%CI 0.81-1.00)<br>aOR: For severe AKI: sCysC 5.28 (1.64-16.99); uIGFBP-7 2.94 (1.08-8.01); uCysC 1.13 (1.02-1.25), adjusted for body weight, sepsis and PRISM III score |
| Baskin (2005) | Other (AKI defined by Serum Creatinine > 1.2 mg/dL, urine output < 0.5 mL/kg/hr for 4 hours)                                                 | Other (Descriptive)                                                        | PCICU population (only cardiac)                         | AKI anytime                                                              | Mortality                                                                             | aOR: AKI was not associated with mortality in this manuscript                                                                                                                                                                                                                                                                                                                                                                        |
| Basu (2017)   | KDIGO, Other (Renal Angina Index)                                                                                                            | Validation                                                                 | General PICU population (mixed cardiac and non-cardiac) | Day 1 score of RAI                                                       | Organ-specific outcomes/residual morbidity                                            | Other: Multiple outcomes related to RAI - versus nothing, increase from baseline creatinine, etc                                                                                                                                                                                                                                                                                                                                     |
| Basu (2011)   | RIFLE, Plasma biomarkers                                                                                                                     | Validation                                                                 | General PICU population (only non-cardiac)              | Within 7 days                                                            | Mortality, Outcomes related to MODS                                                   | Se: For SSAKI Prediction: MMP-8 89%, Ela-2 83%<br>Sp: For SSAKI Prediction: MMP-8 29%, Ela-2 42%<br>PPV: For SSAKI Prediction: MMP-8 15%, Ela-2 16%<br>NPV: For SSAKI Prediction: MMP-8 95%, Ela-2 95%<br>AUROC: For SSAKI Prediction: MMP-8 0.66, Ela-2 0.69                                                                                                                                                                        |
| Basu (2014)   | RIFLE, Plasma biomarkers, Other                                                                                                              | Validation                                                                 | General PICU population (only non-cardiac)              | AKI on Day 3                                                             | Mortality, Organ-specific outcomes/residual morbidity                                 | AUROC: Prediction of AKI on day 3: Renal angina: 0.8, MMP-8+renal angina 0.84, ELA-2+renal angina 0.86, NRI and IDI significant increase with biomarker incorporation into renal angina index model                                                                                                                                                                                                                                  |

|                |                                                                |                                                       |                                                            |                                                                            |                                                                                                                             |                                                                                                                                                                                                                                                                                                                                                                                                                                                               |
|----------------|----------------------------------------------------------------|-------------------------------------------------------|------------------------------------------------------------|----------------------------------------------------------------------------|-----------------------------------------------------------------------------------------------------------------------------|---------------------------------------------------------------------------------------------------------------------------------------------------------------------------------------------------------------------------------------------------------------------------------------------------------------------------------------------------------------------------------------------------------------------------------------------------------------|
|                | (Renal angina index)                                           |                                                       |                                                            |                                                                            |                                                                                                                             |                                                                                                                                                                                                                                                                                                                                                                                                                                                               |
| Basu (2014)    | KDIGO, Other (Renal angina index)                              | Derivation                                            | General PICU population (only non-cardiac)                 | Day 3 AKI prediction                                                       | Organ-specific outcomes/residual morbidity                                                                                  | Se: Renal angina+ for Day 3 AKI: 75%<br>Sp: Renal angina+ for Day 3 AKI: 73%<br>PPV: Renal angina+ for Day 3 AKI: 40%<br>NPV: Renal angina+ for Day 3 AKI: 92%<br>AUROC: Renal angina+ for Day 3 AKI: 0.72-0.80<br>Youden's index: Renal angina+ for Day 3 AKI: 48                                                                                                                                                                                            |
| Bennett (2018) | Urine biomarkers                                               | Other (Testing predictive power of urinary biomarker) | PCICU population (only cardiac)                            | Urine samples immediately before CPB, AKI within 48 hours after surgery    | Organ-specific outcomes/residual morbidity                                                                                  | AUROC: Preoperative urine uromodulin AUROC 0.90 to predict AKI after CPB<br>aOR: uMOD levels in the lowest quartile = 132.3 OR (95% CI 17.1-1020.5) for post-op AKI; adjusted for uCr levels                                                                                                                                                                                                                                                                  |
| Bennett (2008) | Urine biomarkers                                               | Validation                                            | PCICU population (only cardiac)                            | Day 1, 2, 3 of CPB surgery                                                 | Mortality, Organ-specific outcomes/residual morbidity, Other (Development of AKI, duration of AKI, hospital length of stay) | Se: 2hr NGAL over 50ng/ml for AKI: 0.89<br>Sp: 2hr NGAL over 50ng/ml for AKI: 0.85<br>AUROC: 2hr NGAL over 50ng/ml for AKI: 0.93                                                                                                                                                                                                                                                                                                                              |
| Bestati (2010) | Other (Renal dysfunction by PELOD subscore (creatinine-based)) | Validation                                            | General PICU population (mixed cardiac and non-cardiac)    | Worse in first 7 days                                                      | Mortality                                                                                                                   | aOR: OR adjusted for 5 other organ dysfunctions. Neonates aOR : 0.97 (0.87, 1.09); Older children aOR: 1.1 (1.03,1.17)                                                                                                                                                                                                                                                                                                                                        |
| Bhaskar (2015) | Other (Fluid Overload)                                         | Derivation                                            | General PICU population (mixed cardiac and non-cardiac)    | NR                                                                         | Mortality                                                                                                                   | aOR: Fluid overload aOR 9.17 for death (95 % CI 2.22-55.57)                                                                                                                                                                                                                                                                                                                                                                                                   |
| Bjork (2019)   | Other (Validation of GFR equations)                            | Validation                                            | Other (Multiple registries, setting not clear but not ICU) | NR                                                                         | Other (Bias and precision of the equations)                                                                                 | Other: Composite creatinine and CysC equations were consistently more precise than single-marker equations at all mGFR levels, CysC had better accuracy below mGFR 75                                                                                                                                                                                                                                                                                         |
| Bojan (2014)   | Urine biomarkers                                               | Validation                                            | PCICU population (only cardiac)                            | Pre-operative and serially within 48 hours after surgery (up to 6 samples) | Mortality, Organ-specific outcomes/residual morbidity                                                                       | Se: For RRT/death: Before CPB 0.81 (0.58-1), within 1hr of CPB 0.55 (0.47-1)<br>Sp: For RRT/death: Before CPB 0.68 (0.40-0.94), within 1 hr of CPB 0.85 (0.31-0.96)<br>LR: For RRT/death: Before CPB 2.56 (1.45-8.52), within 1 hr of CPB 3.61 (1.39-14.17)<br>AUROC: For RRT/death: before CPB 0.679 (0.512-0.847), within 1 hr of CPB 0.656 (0.458-0.853)<br>aOR: For RRT/Death: Before CPB 9.57 (3.32-infinity), within 1 hour of CPB 6.87 (2.04-infinity) |
| Bojan (2013)   | Other (The authors identified 3                                | NR                                                    | PCICU population (only cardiac)                            | Within 2 days of cardiac surgery                                           | Mortality                                                                                                                   | AUROC: Discrimination between survivors and patients who died by early creatinine changes: AUROC of 0.687, 95% CI: 0.593-0.778 on the                                                                                                                                                                                                                                                                                                                         |



|                   |                                                                      |              |                                                                   |                                                                |                                                                                                                 |                                                                                                                                                                                                                                                                                                                                                                                                                                                                                                                                                                                                                                                                                                                                                                                                                                                                                     |
|-------------------|----------------------------------------------------------------------|--------------|-------------------------------------------------------------------|----------------------------------------------------------------|-----------------------------------------------------------------------------------------------------------------|-------------------------------------------------------------------------------------------------------------------------------------------------------------------------------------------------------------------------------------------------------------------------------------------------------------------------------------------------------------------------------------------------------------------------------------------------------------------------------------------------------------------------------------------------------------------------------------------------------------------------------------------------------------------------------------------------------------------------------------------------------------------------------------------------------------------------------------------------------------------------------------|
|                   | clusters of serum creatinine change to describe creatinine kinetics) |              |                                                                   |                                                                |                                                                                                                 | day of surgery, 0.704, 95% CI: 0.610-0.784 on post-operative day 1, and 0.746, 95% CI: 0.663-0.825 on post-operative day 2                                                                                                                                                                                                                                                                                                                                                                                                                                                                                                                                                                                                                                                                                                                                                          |
| Borasino (2018)   | KDIGO                                                                | Other (None) | PCICU population (only cardiac)                                   | NR                                                             | Other (AKI is the outcomes (furosemide stress test following cardiac surgery))                                  | AUROC: Furosemide response predicted: predicted cs-aki AUROC 0.69 peak FO AUROC 0.68, predicted prolong PD AUROC 0.79 and prolonged mechanical ventilation 0.79.                                                                                                                                                                                                                                                                                                                                                                                                                                                                                                                                                                                                                                                                                                                    |
| Bresolin (2013)   | pRIFLE                                                               | Validation   | General PICU population (mixed cardiac and non-cardiac)           | PICU admission                                                 | Mortality, Other (AKI (for risk factors); Length of stay)                                                       | Other: No adjusted analyses were done. They found that AKI was associated in univariable analyses with length of stay (p=0.001); mortality (p = 0.0002). In univariable analyses, PRIMs 2, PIM2, younger age, septic shock, mechanical ventilation, nephrotoxic drugs, and vasoactive drugs were associated with AKI                                                                                                                                                                                                                                                                                                                                                                                                                                                                                                                                                                |
| Bucholz (2015)    | AKIN, Plasma biomarkers                                              | Validation   | PCICU population (only cardiac)                                   | Post-operative                                                 | Mortality, Other (Developed of AKI by AKIN; mortality; PICU and hospital LOS; time to extubation)               | Se: Optimal cutoff values for sensitivity, specificity, PPV and NPV to predict postop AKI for pre-op CKMG, preop FABP and post-op hs-cTnT, respectively were (showing biomarker cutoff, sensitivity, specificity, PPV and NPV): 2.9, 64.2, 64.6, 66.7, 62.0 & 2.6, 68.0, 68.8, 69.4, 67.4 & 2668, 58.2, 58.8, 60.4, 56.6<br>Sp: See sensitivity<br>PPV: See sensitivity<br>NPV: See sensitivity<br>AUROC: Preop NT pro-BNP, cTnI, and hs-cTnT all had AUROC <0.58 to predict postop AKI; preop CK-MB and h-FABP had AUROC 0.70 (0.60-0.81) for post-op AKI; Post-op all 5 biomarkers had AUROC <0.63 to predict AKI.<br>aOR: Preoperative CK-MB and h-FABP: associated with post io AKI (aOR: 5.09 (1.64-15.82) and 3.02 (1.35-6.75)); post-op these biomarkers were not associated with AKI. Pre-op or post-op NT pro-BNP, cTnI, and hs-cTnT were not associated with post-op AKI. |
| Burra (2018)      | KDIGO                                                                | Validation   | PCICU population (only cardiac)                                   | 48 hours                                                       | Other (POs at 24-48 hrs to predict subsequent AKI)                                                              | Se: PO4 at 24 hours 75%, PO4 at 48 hours 67%<br>Sp: PO4 at 24 hours 94%, PO4 at 48 hours 98%<br>PPV: PO4 > 6.4 at 24 hours 50%, PO4 at 48 hours 86%<br>NPV: PO4 > 6.4 at 48 hours 97.8%, PO4 at 48 hours 93%<br>AUROC: PO4 at 24 hours 0.711, PO4 at 48 hours 0.86                                                                                                                                                                                                                                                                                                                                                                                                                                                                                                                                                                                                                  |
| Cabral (2015)     | pRIFLE                                                               | Validation   | Other (General PICU population (unclear if mixed cardiac or not)) | pRIFLE at PICU admission and maximum pRIFLE during PICU course | Mortality, Other (Duration of mechanical ventilation, duration of vasoactive drug therapy, length of PICU stay) | Other: Standardized mortality ratio (based on PIM2 expected mortality) of 2.19 for those with max pRIFLE of F, compared to 0.7-0.8 SMR for those with other max pRIFLE scores or no AKI                                                                                                                                                                                                                                                                                                                                                                                                                                                                                                                                                                                                                                                                                             |
| Cantinotti (2017) | Plasma biomarkers, Other (Cystatin-C)                                | Validation   | PCICU population (only cardiac)                                   | 2h, 6h, 12h post-op                                            | Organ-specific outcomes/residual morbidity, Other (Organ specific: AKI                                          | AUROC: Cystatin-c at 12h: AUROC for any AKI= 0.746; AUROC for stage 3 AKI = 0.886<br>Other: Cystatin-c at 12h hazard ratio of "complicated course"=2.66 (1.75-4.059)                                                                                                                                                                                                                                                                                                                                                                                                                                                                                                                                                                                                                                                                                                                |

|                   |                                                                                                                                                |                                         |                                                                                     |                                |                                                                                                                   |                                                                                                                                                                                                                                                                                                                                                                                                                                                                                               |
|-------------------|------------------------------------------------------------------------------------------------------------------------------------------------|-----------------------------------------|-------------------------------------------------------------------------------------|--------------------------------|-------------------------------------------------------------------------------------------------------------------|-----------------------------------------------------------------------------------------------------------------------------------------------------------------------------------------------------------------------------------------------------------------------------------------------------------------------------------------------------------------------------------------------------------------------------------------------------------------------------------------------|
|                   |                                                                                                                                                |                                         |                                                                                     |                                | per RIFLE. Composite of complications and prolonged mechanical ventilation)                                       |                                                                                                                                                                                                                                                                                                                                                                                                                                                                                               |
| Cantinotti (2012) | Urine biomarkers, Plasma biomarkers                                                                                                            | Derivation                              | PCICU population (only cardiac)                                                     | 2, 6, 12 hours after bypass    | Mortality, Organ-specific outcomes/residual morbidity                                                             | AUROC: 2 hour NGAL for AKI prediction AUROC 0.85                                                                                                                                                                                                                                                                                                                                                                                                                                              |
| Cavallin (2019)   | KDIGO                                                                                                                                          | Other (Prognosis of aki to predict HIE) | Other (Neonates with Hypoxic ischemic encephalopathy related to perinatal asphyxia) | NR                             | Functional outcomes/residual morbidity, Other (AKI predicting long term death and disability at 24 months of age) | Se: Sensitivity of AKI 0.19 (95% CI 0.11-0.32)<br>Sp: Specificity of AKI 1 (95% CI 0.88-1)<br>PPV: PPV of AKI 1 (95% CI 0.71-1.00)<br>NPV: NPV of AKI 0.41(95% CI 0.3-0.52)                                                                                                                                                                                                                                                                                                                   |
| Chiravuri (2011)  | pRIFLE                                                                                                                                         | Other (Case-control)                    | PCICU population (only cardiac)                                                     | 3 days for CICU stay           | Mortality, Other (Cardiac failure, open chest, ECMO, LCOS)                                                        | aOR: 12.8 for mortality for F; Complications Respiratory RI [2.4; 1.5, 3.9] F [2; 1.2, 3.5] Neurologic RI [3.8; 2, 7] F [5.6; 3, 10.5] Sepsis RI [3.2; 1.9, 5.3] F [6.9; 4, 11.9] Cardiovascular RI [4.8; 3.1, 7.2] F [21.7; 9.2, 50.9]<br>Other: OR 6.7 for death for RI, 36.7 for death for F, 5.6 for LCOS for RI, 14.2 for F; ECMO RI 8.7; 4.8, 16 F 39.4; 19.9, 77.9; delayed sternal closure RI [2; 1.4, 3] F [3.8; 2.4, 6.3]; additional surgery RI [4.6; 2.8, 7.4] F [8.8; 5.2, 14.8] |
| Choi (2017)       | Other (Specifically fluid overload, and several other variables at CRRT initiation)                                                            | Validation                              | General PICU population (mixed cardiac and non-cardiac)                             | CRRT initiation                | Mortality                                                                                                         | aOR: Fluid overload association with mortality adjusted for multiple factors: aOR 1.190 0.971-1.457; other risk factors evaluated too within the manuscript in the adjusted analyses.                                                                                                                                                                                                                                                                                                         |
| Colasacco (2011)  | Other (Defined renal insufficiency as a rise in serum creatinine greater than or equal to 40% from baseline or oliguria for more than 4 hours) | NR                                      | PCICU population (only cardiac)                                                     | Postoperative days 0, 1, and 2 | NR                                                                                                                | Se: A postoperative day 1 NIRS mean cutoff value of 80% can predict a 40% increase in serum creatinine with a sensitivity of 100%.<br>Sp: A postoperative day 1 NIRS mean cutoff value of 80% can predict a 40% increase in serum creatinine with a specificity of 97%.                                                                                                                                                                                                                       |
| D'Ariezo (2019)   | KDIGO                                                                                                                                          | Other (Evaluating diagnostic            | General PICU population (mixed                                                      | NR                             | Mortality                                                                                                         | aOR: Not adjusted OR to predict mortality Severe AKI 9.9 (6.1-16.1)                                                                                                                                                                                                                                                                                                                                                                                                                           |

|                        |                                                                                                              |                                              |                                            |                                              |                                                                                                                                                               |                                                                                                                                                                                                                    |
|------------------------|--------------------------------------------------------------------------------------------------------------|----------------------------------------------|--------------------------------------------|----------------------------------------------|---------------------------------------------------------------------------------------------------------------------------------------------------------------|--------------------------------------------------------------------------------------------------------------------------------------------------------------------------------------------------------------------|
|                        |                                                                                                              | coding compared to creatinine coding of AKI) | cardiac and non-cardiac)                   |                                              |                                                                                                                                                               |                                                                                                                                                                                                                    |
| De Fontnouvelle (2017) | Plasma biomarkers                                                                                            | Derivation                                   | PCICU population (only cardiac)            | Pre-op and 6 hours post op                   | Organ-specific outcomes/residual morbidity, Other (AKI based on KDIGO)                                                                                        | aOR: In >2years, Pre-op II-8 had aOR 5 (2-13) and post-op TNFa aOR 3 (1-9) for AKI. No association in <2years                                                                                                      |
| de Galasso (2016)      | Other (Fluid overload)                                                                                       | Validation                                   | Other (CRRT)                               | Survival at PICU discharge                   | Mortality                                                                                                                                                     | aOR: In renal patients, fluid overload >10% at CRRT start = OR 10.9 (95% CI 0.8-152.6, p=0.07) for death                                                                                                           |
| de Melo Bezerra (2013) | pRIFLE, Other (UOP (continuous and modified categorical) )                                                   | Other (Modification of existing pRIFLE)      | Other (NICU)                               | Rolling 7 days of NICU admission, worst eGFR | Mortality, Other (New UO cutoffs proposed for new pRIFLE R<1.5 mL/kg/h for 24 h Injury <1.0 mL/kg/h for 24, Failure <0.7 mL/kg/h for 24 h or anuric for 12 h) | AUROC: 0.88 for mortality for new pRIFLE, 0.78 for mortality for UOP<br>aOR: 3.77 for oliguria (UOP <1.5 ml/kg/hr) for mortality                                                                                   |
| Deep (2018)            | Other (Ultrasound-based and other hemodynamic measures)                                                      | Derivation                                   | General PICU population (only non-cardiac) | First 24 hours of PICU                       | Organ-specific outcomes/residual morbidity, Other (AKI stage 2/3 based on KDIGO)                                                                              | Other: Multivariate analysis: Higher CVP and lactate only hemodynamic variables associated with AKI at p=0.01                                                                                                      |
| Dent (2007)            | Plasma biomarkers                                                                                            | Validation                                   | PCICU population (only cardiac)            | Multiple times within 24hr of CPB surgery    | Mortality, Organ-specific outcomes/residual morbidity, Other (Development of AKI, change in creatinine, length of hospital stay)                              | Se: 2hr plasma NGAL over 150ng/ml: 0.84<br>Sp: 2hr plasma NGAL over 150ng/ml: 0.94<br>AUROC: 2hr plasma NGAL over 150ng/ml: 0.96<br>Other: Adjusted beta coefficient B=0.004, p<0.0001                             |
| Devarajan (2010)       | Urine biomarkers, Other (Urine $\alpha$ 1-microglobulin, $\alpha$ 1-acid glycoprotein, and albumin in urine) | Other (Derivation and validation)            | PCICU population (only cardiac)            | 2 hours after CPB                            | Organ-specific outcomes/residual morbidity, Other (AKI as defined by an increase of creatinine from baseline by 50%)                                          | AUROC: Urine $\alpha$ 1-microglobulin at 2h AUROC for AKI=0.85 (0.8, 0.9) ;<br>Urine $\alpha$ 1-acid glycoprotein at 2h AUROC=0.85 (0.8,0.9) ; and Urine albumin at 2h AUROC= 0.69 (0.63, 0.75)                    |
| Diaz (2017)            | Other (Peak percent fluid overload)                                                                          | Validation                                   | General PICU population (only non-cardiac) | Any day during PICU admission                | Mortality, Other (LOS, duration mechanical ventilation)                                                                                                       | aOR: For mortality by peak fluid overload 1.01 (CI 0.98,1.02). Authors conclude peak FO not associated with mortality but AKI (pRIFLE) was (aOR 4.6). Peak FO was associated with longer ventilation in survivors. |

|                  |                                                                        |                                                                            |                                                                                     |                                   |                                                                                                                                              |                                                                                                                                                                                                                                                                                                             |
|------------------|------------------------------------------------------------------------|----------------------------------------------------------------------------|-------------------------------------------------------------------------------------|-----------------------------------|----------------------------------------------------------------------------------------------------------------------------------------------|-------------------------------------------------------------------------------------------------------------------------------------------------------------------------------------------------------------------------------------------------------------------------------------------------------------|
| Dobiliene (2019) | Urine biomarkers                                                       | Derivation                                                                 | General PICU population (only non-cardiac)                                          | Day 1 and 3                       | Organ-specific outcomes/residual morbidity, Other (AKI based on AKIN)                                                                        | Other: Mann-Whitney: uNGAL day 1 p=0.04, uIL18 not significant                                                                                                                                                                                                                                              |
| Dong (2017)      | Urine biomarkers                                                       | Validation                                                                 | PCICU population (only cardiac)                                                     | 2, 6, 12, 24 hours after bypass   | Other (Only AKI prediction)                                                                                                                  | AUROC: Variable based upon biomarker evaluated (page 2356)                                                                                                                                                                                                                                                  |
| Dubey (2000)     | Other (Oliguria <400ml/m2/day, rapidly rising BUN and Cr)              | Other (Predictive ability of ROS for mortality)                            | Other (AKI cases (exact method to choose not reported) vs control)                  | NR                                | Mortality                                                                                                                                    | Se: For mortality SOD 3 GPx 53.2 LPO 89.4<br>Sp: For mortality SOD 90 GPx 51 LPO 93.7<br>PPV: Superoxide dismutase (SOD), glutathione peroxidase (GPx) and lipid peroxide (LPO) SOD 74.5, LPO 95.2 for mortality<br>NPV: SOD 71.8, LPO 91.7 for mortality                                                   |
| Elella (2017)    | pRIFLE                                                                 | Validation                                                                 | PCICU population (only cardiac)                                                     | After ECMO cannulation            | Mortality, Other (ECMO duration, ICU length of stay)                                                                                         | Other: Independent t test: AKI vs non-AKI patients: ECMO duration (9 [8] vs 6 [2] days, p=0.02)                                                                                                                                                                                                             |
| El-Gamasy (2018) | Plasma biomarkers                                                      | Derivation                                                                 | AKI of any cause, Other (Critically ill children with and without AKI and controls) | Within 24 hours of admission      | Organ-specific outcomes/residual morbidity, Other (AKI was defined as a 50% increase in serum creatinine from reference range within 2 days) | Se: HSP60 cutoff >10: 97%<br>Sp: HSP60 cutoff >10: 87%<br>PPV: HSP60 cutoff >10: 88%<br>NPV: HSP60 cutoff >10: 96%<br>AUROC: HSP60: 0.99                                                                                                                                                                    |
| Esch (2015)      | AKIN                                                                   | Other (Evaluates factors associated with the development of AKI)           | PCICU population (only cardiac)                                                     | NR                                | Organ-specific outcomes/residual morbidity, Other (Length of stay)                                                                           | Other: Proportional hazards model for length of stay moderate aki 0.56 (0.38, 0.83)                                                                                                                                                                                                                         |
| Fang (2018)      | KDIGO                                                                  | NR                                                                         | General PICU population (only non-cardiac)                                          | First 7 days after PICU Admission | Mortality                                                                                                                                    | Se: At a cutoff of 1260, the peak urinary cystatin C had a sensitivity of 79.2%<br>Sp: At a cutoff of 1260, the peak urinary cystatin C had a specificity of 72.3%<br>aOR: For mortality for patients of patients that did not meet criteria for AKI, but had a positive urinary cystatin C: 9.34 (p<0.001) |
| Fargason (1993)  | Other (Children receiving RRT (ARF< no structured definition for AKI)) | Other (Investigates PRISM as a predictive score in pts with renal failure) | Other (RRT)                                                                         | Anytime                           | Mortality                                                                                                                                    | Other: Predicted mortality vs Observed mortality, respectively: admission PRISM 0% - 1% 25%; 1.1%- 5% 43% (sig by chi2); 5.1%- 15% 100% (sig by chi2); 15.1%-30% 33% ; >30.1% 63% ; time to dialysis 1.7 days in survivors vs 11.1 days in nonsurvivors.                                                    |
| Ferah (2019)     | pRIFLE, AKIN                                                           | Validation                                                                 | General PICU population (only non-cardiac)                                          | Not clear                         | Mortality, Outcomes related to MODS                                                                                                          | Other: AKI Incidence using AKIN: 17.6%; AKI incidence using pRIFLE: 37.8%; AKI group had lower albumin levels using both definitions                                                                                                                                                                        |
| Fernandez (2005) | Other (No specific tool, they                                          | Other (Evaluation of association of                                        | General PICU population (mixed cardiac and non-                                     | Initiation of CRRT                | Mortality                                                                                                                                    | NR                                                                                                                                                                                                                                                                                                          |

|                   |                                                                                                     |                                                                     |                                                         |                                           |                                                                                                                 |                                                                                                                                                                                                                                                                                         |
|-------------------|-----------------------------------------------------------------------------------------------------|---------------------------------------------------------------------|---------------------------------------------------------|-------------------------------------------|-----------------------------------------------------------------------------------------------------------------|-----------------------------------------------------------------------------------------------------------------------------------------------------------------------------------------------------------------------------------------------------------------------------------------|
|                   | determined patient prognostic factors for death in this population receiving CRRT)                  | risk factors with death)                                            | cardiac), Other (Receiving CRRT)                        |                                           |                                                                                                                 |                                                                                                                                                                                                                                                                                         |
| Ferrer (2018)     | KDIGO                                                                                               | Other (Biomarker enrichment of a clinical model for predicting AKI) | PCICU population (only cardiac)                         | Within 48 hours of ICU admission          | Other (Risk of severe AKI using the KDIGO criteria)                                                             | AUROC: The ROC for postoperative urinary syndecan-1: 0.793                                                                                                                                                                                                                              |
| Fitzgerald (2016) | KDIGO                                                                                               | Other (Descriptive)                                                 | General PICU population (only non-cardiac)              | NR                                        | Mortality, Functional outcomes/residual morbidity, Other (Composite of 1) death or 2) worse disability by POPC) | aOR: Severe acute kidney injury predicted composite outcome aOR 2.5                                                                                                                                                                                                                     |
| Flores (2008)     | Other (Multiple patient and crtt clinical variables were evaluated for associations with mortality) | Other (Not really applicable)                                       | General PICU population (mixed cardiac and non-cardiac) | CRRT pre, initiation                      | Mortality                                                                                                       | Other: Multivariable analysis done only controlling for prism score showed that Paw at CRRT termination was association with mortality                                                                                                                                                  |
| Flori (2011)      | Other (Cumulative fluid balance over first 3 days of ALI)                                           | Derivation                                                          | Other (ALI with PF<300)                                 | Day 3 of ALI                              | Mortality, Other (Ventilator free days)                                                                         | aOR: For mortality 1.08 with each increase in 10ml/kg/day                                                                                                                                                                                                                               |
| Foland (2004)     | Other (Fluid overload % on CRRT initiation)                                                         | Validation                                                          | General PICU population (only non-cardiac)              | % FO at CRRT initiation                   | Mortality, Outcomes related to MODS                                                                             | aOR: Median FO% independently associated with mortality                                                                                                                                                                                                                                 |
| Fuhrman (2019)    | KDIGO                                                                                               | Validation                                                          | General PICU population (only non-cardiac)              | 24 hours post-operatively                 | Other (Biomarker prediction of AKI using KDIGO)                                                                 | AUROC: When obtained 6 hours after liver transplant, the AUROC under the ROC curve was 0.900 for NGAL and 0.933 for the product of TIMP-2 and IGFB7                                                                                                                                     |
| Gawadia (2019)    | KDIGO, Other (Renal angina index to                                                                 | Validation                                                          | General PICU population (mixed cardiac and non-cardiac) | Day 3 severe AKI (KDIGO stage 2 or above) | Mortality, Other (Renal recovery)                                                                               | Other: Of the 69 children developing severe AKI (≥ Stage 2) during ICU, 49 (71%) had complete recovery of renal function and 4 had some improvement. 16 children had persistent severe dAKI and all died at a median (IQR) time of 3.5 (2,5) days after admission. RAI 0 to predict day |

|                            |                                                                                                                                                                                                                                    |                           |                                                              |                                                 |                                                                                                        |                                                                                                                                                                                                                                                                                                                                                                                                                                                                                                                                                                                                                                                                                                                                                                                                   |
|----------------------------|------------------------------------------------------------------------------------------------------------------------------------------------------------------------------------------------------------------------------------|---------------------------|--------------------------------------------------------------|-------------------------------------------------|--------------------------------------------------------------------------------------------------------|---------------------------------------------------------------------------------------------------------------------------------------------------------------------------------------------------------------------------------------------------------------------------------------------------------------------------------------------------------------------------------------------------------------------------------------------------------------------------------------------------------------------------------------------------------------------------------------------------------------------------------------------------------------------------------------------------------------------------------------------------------------------------------------------------|
|                            | predict day 3 AKI)                                                                                                                                                                                                                 |                           |                                                              |                                                 |                                                                                                        | 3 severe AKI is 55.5 (8.9, 333.3); <0.001, not sure what is in the multivariable model.                                                                                                                                                                                                                                                                                                                                                                                                                                                                                                                                                                                                                                                                                                           |
| Gillespie (2004)           | Initiation of RRT                                                                                                                                                                                                                  | Derivation                | General PICU population (mixed cardiac and non-cardiac)      | FO at CRRT initiation                           | Mortality                                                                                              | aOR: 10% FO at CRRT initiation = 3.02 OR for death (1.5-6.1)                                                                                                                                                                                                                                                                                                                                                                                                                                                                                                                                                                                                                                                                                                                                      |
| Gil-RuizGil-Esparza (2014) | pRIFLE                                                                                                                                                                                                                             | Validation                | PCICU population (only cardiac)                              | Early AKI within 72h of CPB, late AKI after 72h | Mortality, Other (Pediatric intensive care length of stay >12days, mechanical ventilation time >4days) | aOR: Adjustments based on age, CPB time, DHCA use, RACHS-1, and prior cardiac surgeries. Early AKI per pRIFLE aOR (95%CI) for mortality: Any =6.2 (1.9-19.5), R=3.9 (1, 16.1), I=8.6 (1.6, 45.3), F=12.5 (2.5, 63.4)                                                                                                                                                                                                                                                                                                                                                                                                                                                                                                                                                                              |
| Giordano (2017)            | Plasma biomarkers                                                                                                                                                                                                                  | Derivation                | PCICU population (only cardiac)                              | 6, 12, 24, 48 hours after bypass                | NR                                                                                                     | Other: Correlation                                                                                                                                                                                                                                                                                                                                                                                                                                                                                                                                                                                                                                                                                                                                                                                |
| Gist (2016)                | pRIFLE, Urine biomarkers, Plasma biomarkers, Other (NIRS; biomarker event (and urine IL-18, serum IL-6, and serum IL-8 higher than predefined thresholds (serum IL-6 > 125 pg/mL, serum IL-8 > 40 pg/mL, urine IL-18 > 58 pg/mL))) | Validation                | PCICU population (only cardiac), Other (Cardiac OR and CICU) | First 24 hours after CBP                        | Mortality, Other (Hospital and ICU LOS, LOV)                                                           | Other: Summary stat comparison: NIRS event + biomarker event( and urine IL-18, serum IL-6, and serum IL-8 higher than predefined thresholds (serum IL-6 > 125 pg/mL, serum IL-8 > 40 pg/mL, urine IL-18 > 58 pg/mL)) Hospital LOS of NIRS event+ biomarker geometric mean and 95% CI, 23 d [13-39 d] vs 10 d [9-12 d]; 22 d [14-36 d] vs 10 d [8-12 d]; and 22 d [14-36 d] vs 10 d [8-12 d]). NIRS event + serum IL-6 and serum IL-8 ICU LOS, difference in LOS (geometric mean and 95% CI, 11 d [6-20 d] vs 5 d [4-6 d]). NIRS event LOV (58hr; 95% CI, 32-106) vs not (26hr; 95% CI, 21-32) (p = 0.05). ICU and hospital LOS in NIRS event (11 d; 95% CI, 6-20 and 22 d; 95% CI, 14-36) vs not (5 d; 95% CI, 4-6 and 9 d; 95% CI, 8-12).30-day mortality same (only 1 death in non event group) |
| Goldstein (2005)           | Other (Risk factors at initiation of CRRT associated with mortality)                                                                                                                                                               | Other (Adjusted analysis) | General PICU population (mixed cardiac and non-cardiac)      | CRRT initiation                                 | Mortality                                                                                              | Other: Multivariate analysis controlling for severity of illness using PRISM 2 at CRRT initiation revealed that %FO was significantly lower for survivors versus nonsurvivors (P < 0.05)                                                                                                                                                                                                                                                                                                                                                                                                                                                                                                                                                                                                          |
| Goldstein (2001)           | Other (NR)                                                                                                                                                                                                                         | Other (Adjusted analysis) | General PICU population (only non-cardiac)                   | Initiation of CRRT                              | Mortality                                                                                              | Other: Multivariate analysis controlling for severity of illness using PRISM at CRRT initiation demonstrated that %FO was significantly lower for survivors versus non-survivors (P < 0.05)                                                                                                                                                                                                                                                                                                                                                                                                                                                                                                                                                                                                       |

|                  |                                                                                                                                                                                        |                                           |                                                                           |                                                                          |                                                                                          |                                                                                                                                                                                                                                                                                                                            |
|------------------|----------------------------------------------------------------------------------------------------------------------------------------------------------------------------------------|-------------------------------------------|---------------------------------------------------------------------------|--------------------------------------------------------------------------|------------------------------------------------------------------------------------------|----------------------------------------------------------------------------------------------------------------------------------------------------------------------------------------------------------------------------------------------------------------------------------------------------------------------------|
| Greenberg (2015) | AKIN, Plasma biomarkers                                                                                                                                                                | Validation                                | PCICU population (only cardiac)                                           | Post-op AKI                                                              | Other (AKI, Stage 2 AKI; PICU and hospital LOS, time to extubation)                      | Se: Sens and spec for third tertile of preop IL-6 (2.2 pg/ mL) was 0.63 and 0.76;<br>Sp: See Se above.<br>AUROC: Pre-op IL6 to predict post- AKI stage 2 0.69                                                                                                                                                              |
| Haase (2011)     | Urine biomarkers, plasma biomarkers, Other (AKI as well (biomarkers to predict AKI -- varying definitions across the different pooled studies, which I will not review individually) ) | Validation                                | General PICU population (mixed cardiac and non-cardiac)                   | From 36 to 48 hours before AKI attainment                                | Mortality, Other (AKI; need for RRT; need for RRT or mortality; ICU stay; hospital stay) | Other: No specific analyses can discern pediatric from adult data. Think we need to exclude                                                                                                                                                                                                                                |
| Hamed (2013)     | RIFLE, Other (AKI was also defined by an estimated GFR <80 ml/min/1.73 m2 using the Schwartz equation and a cystatin C based equation)                                                 | NR                                        | General PICU population (mixed cardiac and non-cardiac), AKI of any cause | NR                                                                       | NR                                                                                       | Se: Serum cystatin C for detecting AKI: 78.9%<br>Sp: Serum cystatin C for detecting AKI: 53.8%<br>AUROC: Serum cystatin C for detecting AKI: 0.66                                                                                                                                                                          |
| Han (2008)       | Urine biomarkers                                                                                                                                                                       | Validation                                | PCICU population (only cardiac)                                           | 2, 6, 12, 24, 36 and 48 hours after CPB                                  | Other (Post-op AKI = 50% increase from baseline SCr)                                     | AUROC: Combination of urine KIM-1, NAG and MMP-9 predicting AKI: 2h AUROC 0.66 (95%CI 0.52-0.83), 6h AUROC 0.61 (95%CI 0.50-0.80), 12h AUROC 0.83 (95%CI 0.69-0.96), 24h AUROC 0.79 (95%CI 0.62-0.93), 36h AUROC 0.85 (95%CI 0.69-0.96), 48h AUROC 0.81 (95%CI 0.68-0.94)                                                  |
| Hassinger (2014) | pRIFLE, Other (Fluid overload)                                                                                                                                                         | Other (Association between FO and pRIFLE) | PCICU population (only cardiac)                                           | Early FO = 5% cumulative fluid balance up to midnight of POD#1 (50ml/kg) | NR                                                                                       | AUROC: Early FO AUROCROC for pRIFLE I or F 0.829 (95%CI 0.679-0.979, p=0.004); volume of fluid administered through POD#4 predicted pRIFLE F AUROCROC 0.963, 95%CI 0.916-1.000, p=0.002<br>aOR: FO on POD 0 = OR 5.92, 95%CI 1.31-26.7, p=0.021 for AKI on POD1; FO on POD 1 = OR 3.2, 95%CI 1.03-9.76, p=0.045 for AKI on |

|                  |                                                      |                                                                        |                                                                            |                                 |                                                                                                                                    |                                                                                                                                                                                                                                                                                                                                                                                              |
|------------------|------------------------------------------------------|------------------------------------------------------------------------|----------------------------------------------------------------------------|---------------------------------|------------------------------------------------------------------------------------------------------------------------------------|----------------------------------------------------------------------------------------------------------------------------------------------------------------------------------------------------------------------------------------------------------------------------------------------------------------------------------------------------------------------------------------------|
|                  |                                                      |                                                                        |                                                                            |                                 |                                                                                                                                    | POD2; FO on POD2 carried OR 4.26 (95%CI 1.4-12.98, p=0.011) for AKI on POD 3                                                                                                                                                                                                                                                                                                                 |
| Hassinger (2012) | Plasma biomarkers                                    | Validation                                                             | PCICU population (only cardiac)                                            | Pre-op, Post-op day 0 through 4 | Other patient-centered outcomes, Other (LMV, MV longer than 48 hours, LOS-ICU, LOS-hosp, LCOS)                                     | Other: Spearman correlation between serum ADMA levels and eGFR: rs ranged between -0.231 to -0.443 from pre-op to POD #2. Peak ADMA level and lowest eGFR: rs=-0.447, p<0.001                                                                                                                                                                                                                |
| Hassinger (2012) | pRIFLE, Plasma biomarkers                            | Validation                                                             | PCICU population (only cardiac)                                            | POD 0 through POD 4             | Other (AKI = increase in SCr by 50%)                                                                                               | AUROC: Serum cystatin C values POD 1 for AKI 0.895 (95%CI 0.793-0.996)                                                                                                                                                                                                                                                                                                                       |
| Hayes (2009)     | Initiation of RRT, Other (FO% at RRT initiation)     | Validation                                                             | General PICU population (only non-cardiac)                                 | FO% at CRRT initiation          | Mortality, Outcomes related to MODS                                                                                                | aOR: >20% FO at initiation is independently associated with worse outcome                                                                                                                                                                                                                                                                                                                    |
| Hazle (2013)     | AKIN, Urine biomarkers                               | NR                                                                     | PCICU population (only cardiac)                                            | NR                              | Other (Composite outcome: renal support therapy, death within 30 days, prolonged time to extubation, prolonged ICU length of stay) | Se: NGAL 0.64, IL-18 0.59, Cys C 0.51<br>Sp: NGAL 0.87, IL-18 0.86, Cys C 0.79<br>Other: AKI incidence 86%, did not distinguish outcomes                                                                                                                                                                                                                                                     |
| Herbert (2015)   | Plasma biomarkers                                    | Derivation                                                             | PCICU population (only cardiac)                                            | Postop day 1, 2, 3              | Other (Urine NGAL-defined AKI (defined at 6hr post CPB surgery))                                                                   | Se: CysC 15% increase from baseline on POD 2: 0.80<br>Sp: CysC 15% increase from baseline on POD 2: 0.89<br>PPV: Max decrease in CysC-based GFR: 0.80; Max decrease in Cr-based GFR: 0.33<br>NPV: Max decrease in CysC-based GFR: 0.89; Max decrease in Cr-based GFR: 0.753<br>AUROC: POD 2 CysC 0.87, POD 2 Creatinine 0.58                                                                 |
| Hessey (2017)    | KDIGO                                                | Other (Goal was to compare different methods to estimate baseline SCr) | General PICU population (mixed cardiac and non-cardiac)                    | AKI during PICU admission       | Mortality, Other (PICU LOS, duration of mechanical ventilation)                                                                    | aOR: Mortality: aOR of AKI and stage 2 AKI with mortality: 3.5 (1.2-9.8) and 4.2 (1.4-12.2)<br>Other: Adjusted hazard ration for AKI and stage 2 AKI with PICU LOS (lower hazard ratio shows association): 0.6 (0.4-0.7) and 0.5 (0.3-0.7); Adjusted hazard ration for AKI and stage 2 AKI with ventilation duration (lower hazard ratio shows association): 0.6 (0.4-0.8) and 0.5 (0.4-0.8) |
| Hessey (2018)    | KDIGO                                                | Validation                                                             | General PICU population (only non-cardiac)                                 | Unclear                         | Mortality, Other (5-7yr mortality)                                                                                                 | Other: adjusted HR Stage 1 AKI 3.27 (1.5-7.13), Stage 2 AKI 4.29 (1.73-10.66), Stage 3 AKI 2.60 (0.84-7.99)                                                                                                                                                                                                                                                                                  |
| Hoffman (2013)   | Urine biomarkers, Other (Urine NGAL, FGF-2, and EGF) | Validation                                                             | Other (Term newborns with HIE on hypothermia, and newborns requiring ECMO) | By 24h and 48h of therapy       | Organ-specific outcomes/residual morbidity, Other (Development of AKI per pRIFLE)                                                  | AUROC: At therapy initiation: uNGAL AUROC for AKI in ECMO/HIE pts=0.54, uFGF-2 AUROC for AKI in ECMO/HIE=0.64, uEGF AUROC for AKI in ECMO/HIE: 0.51                                                                                                                                                                                                                                          |



|                   |                                                                                    |                                                                                            |                                                         |                                                                     |                                                                                                                                                                                                                            |                                                                                                                                                                                                                                                                                                                                                                                                                                                                                 |
|-------------------|------------------------------------------------------------------------------------|--------------------------------------------------------------------------------------------|---------------------------------------------------------|---------------------------------------------------------------------|----------------------------------------------------------------------------------------------------------------------------------------------------------------------------------------------------------------------------|---------------------------------------------------------------------------------------------------------------------------------------------------------------------------------------------------------------------------------------------------------------------------------------------------------------------------------------------------------------------------------------------------------------------------------------------------------------------------------|
| Hollander (2016)  | KDIGO                                                                              | Other (This is an assessment of Renal Recovery after AKI. Long term morbidity assessment.) | PCICU population (only cardiac)                         | AKI assessed in first 7 post-operative days (Heart transplantation) | Organ-specific outcomes/residual morbidity, Other (Assessment of CKD risk following AKI depending on renal recovery. Could be important part of MODS discussion in terms of how to classify renal dysfunction during stay) | Other: Chi square analysis                                                                                                                                                                                                                                                                                                                                                                                                                                                      |
| Hornik (2014)     | AKIN, Plasma biomarkers                                                            | Validation                                                                                 | PCICU population (only cardiac)                         | Post-op AKI                                                         | Other (AKI; picu and hospital LOS, duration of ventilation (above and below median values))                                                                                                                                | AUROC: Serum BNP preop was not predictive of AKI (AUROC's < 0.6 for mild and severe AKI); was only predictive of LOS, and vent duration with AUROC's >0.67.<br>aOR: Actually RR: Preop serum BNP was not predictive of post-op mild or severe AKI (aRR not significant). Third tertile was associated with LOS over 2 days (aRR 1.92 (1.42, 2.6)), hospital stay over 5 days (aRR 1.32 (0.95, 1.84)) but not vent time.                                                         |
| Hui (2013)        | pRIFLE                                                                             | Derivation                                                                                 | General PICU population (only non-cardiac)              | NR                                                                  | Mortality                                                                                                                                                                                                                  | aOR: Hazard for RIFLEcr --> mortality (R: 4.66, I: 12.28, F: 10.59)                                                                                                                                                                                                                                                                                                                                                                                                             |
| Jayakumar (2013)  | pRIFLE, Urine biomarkers, Other (50% increase in creatinine from baseline (preop)) | Derivation                                                                                 | PCICU population (only cardiac)                         | 3 days post cardiac surgery on CPB                                  | Other (This is for semaphorin 3 A predicting AKI, but correlation with LOS and AKI days also reported)                                                                                                                     | Se: For semaphorin 3A cutoff @492, 81%<br>Sp: For semaphorin 3A cutoff @492, 94%<br>PPV: For semaphorin 3A cutoff @492, 91%<br>NPV: For semaphorin 3A cutoff @492, 87%<br>AUROC: 2 h urinary semaphorin to predict AKI 0.88;<br>aOR: Every 100 pg/mg increase in semaphorin OR 2.19 for AKI<br>Other: Spearman correlation of semaphorin 3A concentrations at different times with hospital LOS (2,6,12, 24hr -0.40-0.53) same time points except 24 hr with AKI days 0.59-0.39 |
| Jhang (2014)      | Other (extrarenal SOFA score)                                                      | Validation                                                                                 | General PICU population (mixed cardiac and non-cardiac) | NR                                                                  | Mortality                                                                                                                                                                                                                  | AUROC: 0.744                                                                                                                                                                                                                                                                                                                                                                                                                                                                    |
| Joffe (2018)      | KDIGO, Other (Regional oxygen saturations)                                         | Other (NR)                                                                                 | PCICU population (only cardiac), AKI of any cause       | NR                                                                  | Other (Baseline, intraop, postop RsO2 for AKI development)                                                                                                                                                                 | aOR: Baseline rSo2 in the highest tertile 7.14 OR for CS-AKI compared with lowest tertile (p = 0.01). Higher average rSo2 during CPB predicted any CS-AKI (OR, 1.06; 95% CI, 1.01-1.12; p = 0.02) and moderate/severe CS-AKI (OR, 1.08; 95% CI, 1.01-1.15; p = 0.02). aOR after adjusting for both CPB time (p = 0.03) and aortic cross-clamp time (p = 0.02) but aOR values not reported                                                                                       |
| Kaddourah (2017)  | KDIGO                                                                              | Validation                                                                                 | General PICU population (only non-cardiac)              | First seven days of PICU admission                                  | Mortality                                                                                                                                                                                                                  | aOR: Severe AKI aOR 1.77                                                                                                                                                                                                                                                                                                                                                                                                                                                        |
| Kakajiwala (2017) | Other (Lack of furosemide response)                                                | Derivation                                                                                 | PCICU population (only cardiac)                         | 2 and 6 hr after CPB surgery                                        | Other (KDIGO AKI)                                                                                                                                                                                                          | Se: 2hr urine output: 0.68, 6hr urine output: 0.80<br>Sp: 2hr urine output: 0.77, 6hr urine output: 0.73<br>NPV: 2hr urine output: 0.96, 6hr urine output: 0.98<br>AUROC: 2hr (adjusted for cardiac surgery severity category: 0.74, 6hr: 0.81                                                                                                                                                                                                                                  |

|                      |                                                                                                                                                                                            |                                                        |                                                                           |                                                            |                                                                                                                  |                                                                                                                                                                                                                                                                                                                                                                                                                                       |
|----------------------|--------------------------------------------------------------------------------------------------------------------------------------------------------------------------------------------|--------------------------------------------------------|---------------------------------------------------------------------------|------------------------------------------------------------|------------------------------------------------------------------------------------------------------------------|---------------------------------------------------------------------------------------------------------------------------------------------------------------------------------------------------------------------------------------------------------------------------------------------------------------------------------------------------------------------------------------------------------------------------------------|
| Kari (2018)          | Other (sCys C and uNGAL)                                                                                                                                                                   | Other (Biomarker predictive power)                     | General PICU population (mixed cardiac and non-cardiac)                   | sCysC and uNGAL levels at 0, 12, 24, 48 hr after admission | Organ-specific outcomes/residual morbidity, Other (AKI using pRIFLE within 48 hours of admission)                | AUROC: uNGAL AUROC = 0.76 (95%CI 0.61-0.92), uNGAL 223ng/mL had 72.7% sensitivity and 89.9% specificity. sCysC AUROC 0.86 (95%CI 0.75-0.97), sCysC level of 1009mcg/L had 63.6% sensitivity and 88.9% specificity; Combined net sensitivity is 90.1% and net specificity 79%                                                                                                                                                          |
| Kaur (2018)          | KDIGO, Other (RAI)                                                                                                                                                                         | Validation                                             | General PICU population (mixed cardiac and non-cardiac), AKI of any cause | Day 3 AKI                                                  | Other (Length of stay, RRT)                                                                                      | Se: Renal angina positivity sensitivity 75 %<br>Sp: Renal angina positivity specificity 88%<br>PPV: Renal angina positivity PPV 35% (95% CI = 28-43%)<br>NPV: Renal angina positivity NPV 98% (95% CI = 96-99%)<br>AUROC: RAI positivity (RAI > 8) predicted Day3-AKI AUROC 0.821 (95% CI 0.733-0.908);<br>Youden's index: RAI also outperformed PRISM-II for the prediction of RAI for Day3-AKI Youden's index = 0.36, AUROC = 0.681 |
| Kavaz (2012)         | pRIFLE, AKIN                                                                                                                                                                               | NR                                                     | General PICU population (mixed cardiac and non-cardiac)                   | AKI during PICU admission                                  | Mortality                                                                                                        | Other: Reported unadjusted mortality rates by AKI mortality 32.3% pRIFLE AKI, 34.9% AKIN AKI, vs 9% without AKI                                                                                                                                                                                                                                                                                                                       |
| Krawczeski (2010)    | pRIFLE, Plasma biomarkers                                                                                                                                                                  | Derivation                                             | PCICU population (only cardiac)                                           | 1, 12, 24 hours after bypass                               | Other (Ability of cystatin C to predict AKI)                                                                     | Se: Various depending on cutoff (page 1555)<br>Sp: Various depending on cutoff (page 1555)<br>AUROC: 0.81                                                                                                                                                                                                                                                                                                                             |
| Krawczeski (2011)    | Urine biomarkers, Other (Urine neutrophil gelatinase-associated lipocalin (NGAL), interleukin 18 (IL-18), liver fatty-acid binding protein (L-FABP), and kidney injury molecule-1 (KIM-1)) | Validation                                             | PCICU population (only cardiac)                                           | 2h, 6h, 12h, 24h after CPB                                 | Organ-specific outcomes/residual morbidity, Other (AKI as defined by increase in SCr by 50% within 48h from CPB) | AUROC: At 2h: uNGAL AUROC=0.9, uIL18=0.59, uFABP =0.5, uKIM-1=0.49; At 6h uNGAL AUROC=0.91, uIL18=0.78, uFABP =0.73, uKIM-1=0.52; At 12h: uNGAL AUROC=0.9, uIL18=0.82, uFABP =0.78, uKIM-1=0.7; At 24h uNGAL AUROC=0.87, uIL18=0.82, uFABP =0.77, uKIM-1=0.80;                                                                                                                                                                        |
| Krawczeski (2011)    | pRIFLE, Urine biomarkers, Plasma biomarkers                                                                                                                                                | Derivation                                             | PCICU population (only cardiac)                                           | NR                                                         | Mortality, Organ-specific outcomes/residual morbidity                                                            | AUROC: Plasma NGAL for AKI: 0.94-0.95, Urine NGAL for AKI: 0.92-0.95, PPV 0.78 and 0.73-0.8 respectively, NPV > 0.93 for all                                                                                                                                                                                                                                                                                                          |
| Krishnamurthy (2013) | AKIN                                                                                                                                                                                       | Other (Descriptive cohort of AKI pts admitted to PICU) | General PICU population (mixed cardiac and non-cardiac)                   | Worst AKI during hospital stay                             | Mortality, Other (Renal recovery - 79% of survivors had complete renal recovery. 6 (20.7%                        | aOR: AKI stages were not significant in univariate or multivariate<br>Other: For mortality Mechanical ventilation odds ratio 9.7; 95% [CI]: 1.1 - 85.5                                                                                                                                                                                                                                                                                |

|                      |                                                                                                      |            |                                            |                                  |                                                                                                                                                                                        |                                                                                                                                                                                                                                                                                                                                                                                                                                                                                                                                                                                                                                                                                                                                                                                                                                                                                                                                                                                                                                                                                                                                                                                                                                                                                                                                                                                                                                                                                                                                                                                                                                                                                                                                                                                                                                                                                                                                                                                       |
|----------------------|------------------------------------------------------------------------------------------------------|------------|--------------------------------------------|----------------------------------|----------------------------------------------------------------------------------------------------------------------------------------------------------------------------------------|---------------------------------------------------------------------------------------------------------------------------------------------------------------------------------------------------------------------------------------------------------------------------------------------------------------------------------------------------------------------------------------------------------------------------------------------------------------------------------------------------------------------------------------------------------------------------------------------------------------------------------------------------------------------------------------------------------------------------------------------------------------------------------------------------------------------------------------------------------------------------------------------------------------------------------------------------------------------------------------------------------------------------------------------------------------------------------------------------------------------------------------------------------------------------------------------------------------------------------------------------------------------------------------------------------------------------------------------------------------------------------------------------------------------------------------------------------------------------------------------------------------------------------------------------------------------------------------------------------------------------------------------------------------------------------------------------------------------------------------------------------------------------------------------------------------------------------------------------------------------------------------------------------------------------------------------------------------------------------------|
|                      |                                                                                                      |            |                                            |                                  | of survivors) had partial renal recovery at discharge)                                                                                                                                 |                                                                                                                                                                                                                                                                                                                                                                                                                                                                                                                                                                                                                                                                                                                                                                                                                                                                                                                                                                                                                                                                                                                                                                                                                                                                                                                                                                                                                                                                                                                                                                                                                                                                                                                                                                                                                                                                                                                                                                                       |
| Lagos-Arevalo (2015) | KDIGO, Urine biomarkers, Plasma biomarkers, Other (KDIGO modified definition for CysC from baseline) | Validation | General PICU population (only non-cardiac) | Throughout PICU admission        | Other (PICU LOS; duration of mechanical ventilation; SCR-AKI was an outcome to validate CysC as an early biomarker; CysC AKI and SCr AKI were used as outcomes to validate biomarkers) | Se: Only reporting the Se and Sp for cutoffs of the significant AUROC's (those reported below in AUROC): Biomarkers within day 1-2 of PICU admission: Urine NGAL (ng/mg) 227 ng/mg (50 % Se) to predict Stage 2 AKI; Urine NGAL (ng/mL): 52 ng/ml (43 % Se) to predict Stage 2 CysC AKI; Urine NGAL (ng/mg) 490 ng/mg (43 % Se) to predict Stage 2 CysC AKI; PICU day 1 serum CysC 0.9 mg/L (Se 45%), 1 mg/L (Se 45%), 1.1 mg/L (Se 27%) to predict AKI; PICU day 1 cysc 0.9 mg/L (Se 50%), 1 mg/L (Se 50%), 1.1 mg/L (Se 50%) to predict Stage 2 SCR-AKI.<br>Sp: Only reporting the Se and Sp for cutoffs of the significant AUROC's (those reported below in AUROC): Biomarkers within day 1-2 of PICU admission: Urine NGAL (ng/mg) 227 ng/mg (50 % Se) to predict Stage 2 AKI; Urine NGAL (ng/mL): 52 ng/ml (43 % Se) to predict Stage 2 CysC AKI; Urine NGAL (ng/mg) 490 ng/mg (43 % Se) to predict Stage 2 CysC AKI; PICU day 1 serum CysC 0.9 mg/L (Sp 84%), 1 mg/L (Sp 89%), 1.1 mg/L (Sp 96%) to predict AKI; PICU day 1 cysc 0.9 mg/L (Sp 77%), 1 mg/L (Sp 83%), 1.1 mg/L (Sp 91%) to predict Stage 2 SCR-AKI.<br>AUROC: Biomarkers within day 1-2 of PICU admission to predict AKI: urine NGAL, il-18, kim-1 and urine CysC -- all AUROC<=0.69 to predict AKI; Urine NGAL (ng/mg) AUROC 0.76 (0.59-0.94) to predict Stage 2 AKI; all other urine biomarkers AUROC<=0.69 to predict Stage 2 AKI; All urine biomarkers AUROC <=0.69 to predict CysC AKI; Urine NGAL (ng/mL): AUROC 0.71 (0.51-0.92) to predict Stage 2 CysC AKI; Urine NGAL (ng/mg) AUROC 0.78 (0.65-0.92) to predict Stage 2 CysC AKI; all other biomarkers AUROC <=0.58 to predict stage 2 CysC AKI; PICU day 1 serum CysC AUROC 0.71 to predict AKI; PICU day 1 cysc AUROC 0.8 to predict Stage 2 SCR-AKI.<br>Other: Adjusted HR (lower means associated): SCR-AKI predicted PICU LOS (aHR 0.56[0.39-0.79]) and longer ventilation (aHR 0.49[0.33=0.72]); CysC AKI was not associated with these outcomes |
| Lee (2017)           | pRIFLE                                                                                               | Validation | PCICU population (only cardiac)            | 7 days following cardiac surgery | NR                                                                                                                                                                                     | aOR: AKI as an outcome-Body weight: 0.841, height: 0.841, body surface area: 0.01, preoperative mechanical ventilation: 4.892                                                                                                                                                                                                                                                                                                                                                                                                                                                                                                                                                                                                                                                                                                                                                                                                                                                                                                                                                                                                                                                                                                                                                                                                                                                                                                                                                                                                                                                                                                                                                                                                                                                                                                                                                                                                                                                         |
| Lex (2014)           | pRIFLE, AKIN, KDIGO                                                                                  | Validation | PCICU population (only cardiac)            | NR                               | Mortality, Organ-specific outcomes/residual morbidity                                                                                                                                  | AUROC: Mortality prediction adjusted: AUROC for AKIN AKI 0.81 (0.74-0.88, AUROC for pRIFLE AKI 0.78 (0.71-0.85), AUROC KDIGO 0.81 (0.75-0.87). AUROC for CRRT adjusted : AKI by pRIFLE 0.87 (0.83-0.91), AKIN without RRT 0.75 (0.69-0.81)                                                                                                                                                                                                                                                                                                                                                                                                                                                                                                                                                                                                                                                                                                                                                                                                                                                                                                                                                                                                                                                                                                                                                                                                                                                                                                                                                                                                                                                                                                                                                                                                                                                                                                                                            |
| Li (2016)            | Other (Fluid overload >=5%)                                                                          | Derivation | Other (PICU population, unclear makeup)    | Day 1 of PICU admission          | Mortality, Other (AKIN AKI, length of mechanical ventilation, length of PICU stay)                                                                                                     | Se: For mortality: 0.78<br>Sp: For mortality: 0.74<br>AUROC: For mortality: 0.78                                                                                                                                                                                                                                                                                                                                                                                                                                                                                                                                                                                                                                                                                                                                                                                                                                                                                                                                                                                                                                                                                                                                                                                                                                                                                                                                                                                                                                                                                                                                                                                                                                                                                                                                                                                                                                                                                                      |
| Liu (2009)           | Plasma biomarkers, Other (Serum interleukin (IL)-1b, IL-5, IL-6, IL-8,                               | Validation | PCICU population (only cardiac)            | 2h, 12h, and 24h after CPB       | Other (AKI was defined as a 50% increase in serum creatinine from baseline within 3 days)                                                                                              | AUROC: Il-6 at 2h AUROC for AKI = 0.76; Il-6 at 12h AUROC for AKI = 0.71; Il-8 at 2h AUROC for AKI = 0.74; Il-6 at 12h AUROC for AKI = 0.82; others NS                                                                                                                                                                                                                                                                                                                                                                                                                                                                                                                                                                                                                                                                                                                                                                                                                                                                                                                                                                                                                                                                                                                                                                                                                                                                                                                                                                                                                                                                                                                                                                                                                                                                                                                                                                                                                                |

|                  |                                                                                                                                                                                                           |                                                              |                                                         |                                                                                       |                                                                                                                                |                                                                                                                                                                                                                                        |
|------------------|-----------------------------------------------------------------------------------------------------------------------------------------------------------------------------------------------------------|--------------------------------------------------------------|---------------------------------------------------------|---------------------------------------------------------------------------------------|--------------------------------------------------------------------------------------------------------------------------------|----------------------------------------------------------------------------------------------------------------------------------------------------------------------------------------------------------------------------------------|
|                  | IL-10, IL-17, interferon (IFN)- $\gamma$ , tumor necrosis factor- $\alpha$ (TNF- $\alpha$ ), granulocyte colony-stimulating factor (G-CSF), and granulocyte macrophage colony-stimulating factor (GM-CSF) |                                                              |                                                         |                                                                                       |                                                                                                                                |                                                                                                                                                                                                                                        |
| Lombel (2012)    | Other (Fluid overload)                                                                                                                                                                                    | NR                                                           | General PICU population (only non-cardiac)              | Fluid overload at CRRT initiation                                                     | Other (Comparison of fluid overload definitions. Other outcome PELOD score)                                                    | Other: Mixed model showed 6/8 definitions of fluid overload predicted PELOD scores                                                                                                                                                     |
| MacDonald (2016) | pRIFLE                                                                                                                                                                                                    | Validation                                                   | General PICU population (only non-cardiac)              | First 7 post-operative days                                                           | Organ-specific outcomes/residual morbidity, Other (LOS)                                                                        | aOR: Inverse PICU days -0.039 (-0.077 to 0.002, p=0.042). Inverse ventilation days -0.041 (-0.102 to 0.019, p=0.179)                                                                                                                   |
| Martin (2013)    | pRIFLE                                                                                                                                                                                                    | Validation                                                   | General PICU population (only non-cardiac)              | Presence of AKI in 48 hours                                                           | Mortality                                                                                                                      | aOR: Odds for death in AKI patients (66): RRT (5.94), nothing else significant (demographic predictors)                                                                                                                                |
| Mathur (2006)    | Other (BUN >20mg/dl on 2 separate occasions at least 24 hours apart)                                                                                                                                      | Other (Comparison of pts with AKI vs not in septic newborns) | Other (Outborn septic neonates)                         | Anytime during nursery stay                                                           | Mortality, Organ-specific outcomes/residual morbidity, Other (AKI; non recovery in 56% of AKI cases; duration of AKI 5.5 days) | Se: Shock for AKI 71; wt < 2500 for AKI 87<br>Sp: Shock for AKI 73; wt < 2500 for AKI 32<br>PPV: Shock for AKI 48; wt < 2500 for AKI 31<br>NPV: Shock for AKI 88; wt < 2500 for AKI 87<br>Other: Mortality in AKI 70% vs 25% in no-AKI |
| Matics (2017)    | Plasma biomarkers                                                                                                                                                                                         | Validation                                                   | General PICU population (mixed cardiac and non-cardiac) | Maximum level between admission and 28 days, death or discharge, whichever came first | Mortality                                                                                                                      | AUROC: Renal pSOFA score (range 0-4 based on SCr): AUROC 0.76                                                                                                                                                                          |
| Mccaffrey (2015) | pRIFLE                                                                                                                                                                                                    | NR                                                           | General PICU population (only non-cardiac)              | First 7 days of PICU admission                                                        | Other (Acute Kidney Injury)                                                                                                    | AUROC: Cys C AUROC to predict pRIFLE I or worse (95% CI): 0.85 (0.67-1.03); NGAL AUROC to predict pRIFLE I or worse (95% CI): 0.72 (0.54-0.89)                                                                                         |
| Meersch (2014)   | Urine biomarkers                                                                                                                                                                                          | Validation                                                   | PCICU population (only cardiac)                         | 4hr and 24hr after CPB surgery                                                        | Other (pRIFLE AKI)                                                                                                             | Se: Nephrocheck 4hr, cutoff 0.7: 0.83<br>Sp: 4hr, cutoff 0.7: 0.77<br>PPV: 4hr, cutoff 0.7: 0.52<br>NPV: 4hr, cutoff 0.7: 0.94                                                                                                         |

|                    |                                                                                                                                                                      |            |                                                                                                                                                                                                     |                                   |                                                                                                                                    |                                                                                                                                                                                                                                                                                                                                                                                                                                                                                                                                                                                                            |
|--------------------|----------------------------------------------------------------------------------------------------------------------------------------------------------------------|------------|-----------------------------------------------------------------------------------------------------------------------------------------------------------------------------------------------------|-----------------------------------|------------------------------------------------------------------------------------------------------------------------------------|------------------------------------------------------------------------------------------------------------------------------------------------------------------------------------------------------------------------------------------------------------------------------------------------------------------------------------------------------------------------------------------------------------------------------------------------------------------------------------------------------------------------------------------------------------------------------------------------------------|
|                    |                                                                                                                                                                      |            |                                                                                                                                                                                                     |                                   |                                                                                                                                    | AUROC: 4hr: 0.85                                                                                                                                                                                                                                                                                                                                                                                                                                                                                                                                                                                           |
| Menon (2016)       | KDIGO, Urine biomarkers                                                                                                                                              | Validation | General PICU population (only non-cardiac)                                                                                                                                                          | NR                                | Mortality, Organ-specific outcomes/residual morbidity                                                                              | AUROC: Of NGAL in RA+ patients for D3AKI (0.97)<br>aOR: For RA and Day3 AKI: 10.1                                                                                                                                                                                                                                                                                                                                                                                                                                                                                                                          |
| Mishra (2008)      | Other (Indirect plasma markers of active oxygen species)                                                                                                             | Derivation | Other (Included all patients with "ARF" which they defined as oliguria,/anuria or a normal urine output with raised serum creatinine, and BUN over 12 in newborns and over 18 in infants/ children) | At the time of hospital admission | Other (Levels of free radicals in patients with ARF when compared to controls; Comparison of levels in survivors vs non survivors) | Se: The cutoff levels of plasma nitrite and ceruloplasmin in predicting mortality in ARF patients: 100%<br>Sp: The cutoff levels of plasma nitrite and ceruloplasmin in predicting mortality in ARF patients: 60.7%                                                                                                                                                                                                                                                                                                                                                                                        |
| Mishra (2005)      | Urine biomarkers, Plasma biomarkers, Other (Acute renal injury=50% increase in creatinine from baseline)                                                             | Derivation | PCICU population (only cardiac)                                                                                                                                                                     | 96 hr post CPB                    | Other (This study is prediction of AKI by NGAL, but is landmark for NGAL)                                                          | Se: 2 h post CPB uNGAL @ 50: 1:00 ; 2 h post CPB serum NGAL @ 25 0:70<br>Sp: 2 h post CPB uNGAL @ 50: 0:98; 2 h post CPB serum NGAL @ 25 0:94<br>PPV: 2 h post CPB uNGAL @ 50: 0:95; 2 h post CPB serum NGAL @ 25 0:82<br>NPV: 2 h post CPB uNGAL @ 50: 1:00; 2 h post CPB serum NGAL @ 25 0:89<br>AUROC: 0.998 for AKI for 2 hr post CPB urine NGAL; 0.906 for 2 h post CPB serum NGAL                                                                                                                                                                                                                    |
| Neunhoeffer (2016) | Other (O2C device measuring renal tissue oxygenation , renal microcirculation blood flow, approximate renal metabolic rate of O2; US-measured renal resistive index) | Validation | PCICU population (only cardiac)                                                                                                                                                                     | 24hr after CPB surgery            | Other (pRIFLE AKI)                                                                                                                 | Se: Repair: rSO2 0.80, rFlow 0.64, aRMRO2 0.73, RRI 0.74; Palliation rSO2 0.78, rFlow 0.83, aRMRO2 0.78, RRI 0.71<br>Sp: Repair: rSO2 0.65, rFlow 0.44, aRMRO2 0.54, RRI 0.68; Palliation rSO2 0.63, rFlow 0.78, aRMRO2 0.75, RRI 0.46<br>PPV: Repair: rSO2 0.59, rFlow 0.42, aRMRO2 0.50, RRI 0.57; Palliation rSO2 0.40, rFlow 0.54, aRMRO2 0.50, RRI 0.26<br>NPV: Repair: rSO2 0.84, rFlow 0.67, aRMRO2 0.76, RRI 0.82; Palliation rSO2 0.90, rFlow 0.94, aRMRO2 0.91, RRI 0.86<br>AUROC: Repair: rSO2 0.75, rFlow 0.52, aRMRO2 0.68, RRI 0.75; Palliation rSO2 0.73, rFlow 0.86, aRMRO2 0.83, RRI 0.60 |
| Nguyen (2005)      | Urine biomarkers, Other (Protein)                                                                                                                                    | Derivation | PCICU population (only cardiac)                                                                                                                                                                     | 2h and 6h post CPB                | Organ-specific outcomes/residual morbidity, Other (AKI as defined by 50%)                                                          | AUROC: Urine protein biomarkers of 28.5, 43 and 66 kDa AUROC for AKI =0.98 each                                                                                                                                                                                                                                                                                                                                                                                                                                                                                                                            |

|                   |                                                                            |                     |                                                              |                                               |                                                                                            |                                                                                                                                                                                                                                                                                                                                                                                                                                                                                                                                                                                                                                                                                                                                                                                                                                                                                                                                                                                                                                                                                                                                                                                                                                                                                                                                                                                                                                                        |
|-------------------|----------------------------------------------------------------------------|---------------------|--------------------------------------------------------------|-----------------------------------------------|--------------------------------------------------------------------------------------------|--------------------------------------------------------------------------------------------------------------------------------------------------------------------------------------------------------------------------------------------------------------------------------------------------------------------------------------------------------------------------------------------------------------------------------------------------------------------------------------------------------------------------------------------------------------------------------------------------------------------------------------------------------------------------------------------------------------------------------------------------------------------------------------------------------------------------------------------------------------------------------------------------------------------------------------------------------------------------------------------------------------------------------------------------------------------------------------------------------------------------------------------------------------------------------------------------------------------------------------------------------------------------------------------------------------------------------------------------------------------------------------------------------------------------------------------------------|
|                   | biomarkers with m/z of 6.4, 28.5, 43 and 66 kDa)                           |                     |                                                              |                                               | or greater increase in serum creatinine)                                                   |                                                                                                                                                                                                                                                                                                                                                                                                                                                                                                                                                                                                                                                                                                                                                                                                                                                                                                                                                                                                                                                                                                                                                                                                                                                                                                                                                                                                                                                        |
| Ormecci (2015)    | Other (Renal NIRS and renal Doppler US measurement of restrictive indices) | Other (Correlation) | PCICU population (only cardiac)                              | 4hr postop after CPB                          | Other (Mean urine output)                                                                  | Other: Restrictive index>0.8 group had lower mean urine output than RI<0.8 group: 9.77 vs 11.25 ml/kg/24hr                                                                                                                                                                                                                                                                                                                                                                                                                                                                                                                                                                                                                                                                                                                                                                                                                                                                                                                                                                                                                                                                                                                                                                                                                                                                                                                                             |
| Palermo (2017)    | Urine biomarkers                                                           | Validation          | General PICU population (only non-cardiac)                   | PICU days 1 to 3                              | Other (AKI and prolonged AKI)                                                              | AUROC: PICU Day 1 uL-18 predicted AKI AUROCROC 0.82, uNGAL and LFABP had AUROCROC less than 0.7                                                                                                                                                                                                                                                                                                                                                                                                                                                                                                                                                                                                                                                                                                                                                                                                                                                                                                                                                                                                                                                                                                                                                                                                                                                                                                                                                        |
| Palmieri (2009)   | pRIFLE                                                                     | Validation          | General PICU population (only non-cardiac), AKI of any cause | Throughout PICU admission                     | Other (NR)                                                                                 | Other: A logistic regression analysis showed that PRISM score (OR 1.3, 95% CI: 1.1-1.4) and total body surface of the burns (OR: 1.04, 95% CI: 1.002-1.1) were independent risk factors for AKI; Since mortality in this study was so low, the mortality analysis was not adjusted.                                                                                                                                                                                                                                                                                                                                                                                                                                                                                                                                                                                                                                                                                                                                                                                                                                                                                                                                                                                                                                                                                                                                                                    |
| Parikh (2013)     | AKIN, Urine biomarkers, Plasma biomarkers                                  | Validation          | PCICU population (only cardiac)                              | Pre and early post-op biomarkers; post-op AKI | Mortality, Other (ICU LOS, Hospital LOS, progression of AKI)                               | AUROC: For Post-op biomarkers at 0-6 hrs, 6-12 hr and day 2 postop, respectively to predict AKI: uKIM-1: 0.64 (0.04), 0.64 (0.04), 0.63 (0.05); urine LFABP: 0.70 (0.04), 0.71 (0.04), 0.66 (0.05); uL18: 0.72 (0.04), 0.76 (0.04), 0.60 (0.05); uNGAL:0.71 (0.04), 0.69 (0.04), 0.59 (0.05); plasma NGAL: 0.56 (0.05), NA ,0.57 (0.05). Urine IL-18 day 1 (0-6 h) and urine L-FABP day 2 to predict AKI: AUROC 0.78 (0.04); Urine IL-18 day 1 (0-6 h), urine NGAL day 1 (0-6 h) and urine L-FABP day 2 AUROC 0.78 (0.04)<br>aOR: First Post-op KIM1 and LFABP were not associated with post op mortality; first postop KIM (highest quintile: aOR 4 (1.2 to 13.3)) and first postop LFABP (5.1 (1.8 to 14.5)) associated with postop Stage 2 AKI<br>Other: Pre-op biomarker urine KIM1 and LFABP not associated with post-op AKI; first post-op KIM1 and LFABP associated with longer PICU and Hospital LOS ("adjusted p"<0.001); Adding first op KIM-1 to the clinical prediction model for AKI did not add to the model (NRI 0.06 [SEM 0.08], P=0.45; however ID was 0.03 (0.01) p=0.03); adding first postop LFABP to the clinical marginally improved AKI prediction (NRI 0.19 (SEM 0.08; P=0.02); IDI was 0.06 (0.02) p=0.002). Similar NRI and IDI, respectively, for urine IL-18: 0.22 (0.09) p=0.02 & 0.05 (0.02) p=0.01; for urine NGAL: 0.18 (0.08) p=0.02 & 0.03 (0.01) p=0.04; for plasma NGAL: 0.14 (0.06) p=0.02 & 0.05 (0.02) p=0.002. |
| Park (2016)       | KDIGO                                                                      | Derivation          | PCICU population (only cardiac)                              | Within 7 days, KDIGO AKI                      | Organ-specific outcomes/residual morbidity                                                 | aOR: For AKI: Age<12 mo: 4.24, Pre-op Hgb < 11 (2.43), Hemoglobin variation by age                                                                                                                                                                                                                                                                                                                                                                                                                                                                                                                                                                                                                                                                                                                                                                                                                                                                                                                                                                                                                                                                                                                                                                                                                                                                                                                                                                     |
| Peco-Antić (2013) | pRIFLE, Urine biomarkers, Plasma biomarkers,                               | Validation          | PCICU population (only cardiac)                              | 48 h after cardiac surgery                    | Mortality, Other (biomarkers pre and at 2, 6, 24, 48 h post cardiac surgery to predict 25% | AUROC: To predict AKI, uL-FABP AUROC 0.84 (pre) and 0.89 (2 h post), CysC (2 h post) 0.73; uNGAL 0.70 (6 h) and 0.93 (24 h);uL-FABP 0.75 (6h) and 0.87 (24 h)                                                                                                                                                                                                                                                                                                                                                                                                                                                                                                                                                                                                                                                                                                                                                                                                                                                                                                                                                                                                                                                                                                                                                                                                                                                                                          |

|                 |                                                                                                        |            |                                                                                                                                     |                                         |                                                                                                                            |                                                                                                                                                                                                                                                                                                                                                 |
|-----------------|--------------------------------------------------------------------------------------------------------|------------|-------------------------------------------------------------------------------------------------------------------------------------|-----------------------------------------|----------------------------------------------------------------------------------------------------------------------------|-------------------------------------------------------------------------------------------------------------------------------------------------------------------------------------------------------------------------------------------------------------------------------------------------------------------------------------------------|
|                 | Other (Primary outcome: 25% decrease in eCCL by Schwartz)                                              |            |                                                                                                                                     |                                         | decrease in eCCL; length of stay)                                                                                          |                                                                                                                                                                                                                                                                                                                                                 |
| Penk (2019)     | Other (Furosemide stress test)                                                                         | Derivation | PCICU population (only cardiac)                                                                                                     | Day 1-7                                 | Outcomes related to MODS                                                                                                   | Other: Odds ratios for severe AKI based on urine flow rate after stress dose of furosemide                                                                                                                                                                                                                                                      |
| Plotz (2008)    | pRIFLE                                                                                                 | Validation | General PICU population (mixed cardiac and non-cardiac), AKI of any cause                                                           | All of PICU admission                   | Mortality                                                                                                                  | Other: Chi Square test comparing mortality in patients with vs. without AKI (25 vs. 5%, p<0.05)                                                                                                                                                                                                                                                 |
| Polat (2013)    | Other (Urine and serum NGAL. Defined AKI as 50% or greater increase in serum creatinine from baseline) | Derivation | General PICU population (only non-cardiac), AKI of any cause                                                                        | At time of AKI diagnosis                | Other (Patients that got AKI were classified as pre-renal or intrinsic based on timing of a return to baseline creatinine) | AUROC: AUROC for urine and serum NGAL to distinguish pre-renal from intrinsic AKI was 0.94 (95% CI: 0.8969-1.02, p<0.001) and 0.86 (95% CI: 0.71-1.02, p=0.002)                                                                                                                                                                                 |
| Portilla (2008) | Urine biomarkers, Plasma biomarkers                                                                    | Validation | PCICU population (only cardiac)                                                                                                     | Within first 12 hours after CPB         | Other (AKI, defined as 50% increase in SCr from baseline before CPB)                                                       | Se: Urinary L-FABP of 486ng/mg at 4hr after CPB for AKI 71.4%; uNGAL at 4hr after CPB = 100% Se for AKI<br>Sp: Urinary L-FABP of 486ng/mg at 4hr after CPB for AKI 68.4%; uNGAL of 100ng/mg at 4 hr = 100% spec for AKI<br>AUROC: Urinary L-FABP at 4 hrs after CPB for AKI AUROCROC 0.810; uNGAL at 4 hr after CPB for AKI had AUROCROC of 1.0 |
| Prasetyo (2016) | pRIFLE, Other (PELOD score utilized to predict AKI by pRIFLE)                                          | Validation | General PICU population (mixed cardiac non-cardiac)                                                                                 | NR                                      | Mortality, Other (PELOD to predict AKI)                                                                                    | AUROC: AUROC for the development of AKI for PELOD score of 6 was 0.75                                                                                                                                                                                                                                                                           |
| Raggal (2013)   | Plasma biomarkers                                                                                      | Validation | Other (Cases= perinatal asphyxia based on AAP criteria; controls healthy neonates matched to BW, gestational age and postnatal age) | Serum NGAL within first 6 hours of life | Other (AKI = elevation of SCr >1.5mg/dL for more than 48 hours)                                                            | Se: Serum NGAL 157ng/mL 83.3% sensitive for AKI<br>Sp: Serum NGAL 157ng/mg was 94.4% specific for AKI<br>PPV: sNGAL 157ng/mg 85.7% PPV for AKI<br>NPV: sNGAL 157ng/mg 92.3% NPV for AKI<br>AUROC: sNGAL at 6 hrs AUROC 0.968 (95%CI 1-1, p<0.001)                                                                                               |

|                          |                                                             |                                   |                                                                           |                                                          |                                                               |                                                                                                                                                                                                                                                                                                                                                      |
|--------------------------|-------------------------------------------------------------|-----------------------------------|---------------------------------------------------------------------------|----------------------------------------------------------|---------------------------------------------------------------|------------------------------------------------------------------------------------------------------------------------------------------------------------------------------------------------------------------------------------------------------------------------------------------------------------------------------------------------------|
| Ramesh (2010)            | Urine biomarkers, Other (Urine Netrin-1)                    | Derivation                        | PCICU population (only cardiac)                                           | 0, 2, 6, 12, 24, 48hr after initiation of CPB            | Other (AKI (50% increase in serum creatinine) and pRIFLE AKI) | Se: Netrin-1 cutoff 1100pg/mg urine creatinine: 0.84<br>Sp: Netrin-1 cutoff 1100pg/mg urine creatinine: 0.80<br>PPV: Netrin-1 cutoff 1100pg/mg urine creatinine: 0.81<br>NPV: Netrin-1 cutoff 1100pg/mg urine creatinine: 0.83<br>AUROC: Netrin-1 at 6hr: 0.86<br>aOR: 1.20 for every 100 pg/mg increase in netrin-1 at 6hr after CPB, p=0.006       |
| Raymakers-Janssen (2019) | KDIGO, Initiation of RRT                                    | Other (Epidemiology and outcomes) | Other (Hematopoietic Stem Cell Transplant Requiring CRRT)                 | NR                                                       | Mortality, Organ-specific outcomes/residual morbidity         | aOR: Mortality                                                                                                                                                                                                                                                                                                                                       |
| Ricci (2012)             | pRIFLE, Plasma biomarkers                                   | Validation                        | PCICU population (only cardiac)                                           | Arrival in PCICU after cardiac surgery                   | Organ-specific outcomes/residual morbidity                    | Se: NGAL > 150 for AKI = 0.13<br>Sp: NGAL > 150 for AKI = 0.91<br>PPV: NGAL > 150 for AKI = 0.66<br>NPV: NGAL > 150 for AKI = 0.45<br>LR: NGAL > 150 for AKI = 1.6                                                                                                                                                                                   |
| Ricci (2012)             | Plasma biomarkers, Other (Serum NGAL)                       | Validation                        | PCICU population (only cardiac), Other (on ECMO)                          | NR                                                       | Organ-specific outcomes/residual morbidity, Other (CRRT)      | Other: Serum NGAL was higher in 3 patients who required CVVH                                                                                                                                                                                                                                                                                         |
| Ricci (2013)             | pRIFLE                                                      | NR                                | PCICU population (only cardiac), Other (CPB only)                         | 7 days of CICU stay                                      | Mortality, Other (LOV, LOS)                                   | Other: Any AKI longer LOV 2 days; range, 1-4 days vs 1 day; range, 1-4 days; longer ICU LOS 4 days, range, 2.75-7 days vs 3 days; range, 2-6 days; all mortality in I and F 4.4% vs 0                                                                                                                                                                |
| Riyuzo (2016)            | pRIFLE, Other (Creatinine elevation by Guignard and Santos) | Derivation                        | General PICU population (only non-cardiac)                                | NR                                                       | Mortality, Organ-specific outcomes/residual morbidity         | Other: Kaplan meier survivor curve based on albumin level and dialysis provision                                                                                                                                                                                                                                                                     |
| Roy (2019)               | KDIGO                                                       | Derivation                        | General PICU population (only non-cardiac)                                | Day 1                                                    | Organ-specific outcomes/residual morbidity                    | Other: Absolute number change in recognizing RAI + patients based on height imputation                                                                                                                                                                                                                                                               |
| Rustagi (2017)           | RIFLE                                                       | Validation                        | General PICU population (mixed cardiac and non-cardiac)                   | During PICU stay                                         | Mortality, Other (Risk factors for AKI development)           | aOR: RR for AKI development: age > 1-5 on admission (2.9), admission PRISM score of > 10 (3.2), shock (3.5), infection (2.6), thrombocytopenia (3.2), hypo-albuminaemia (2.7) and MODS (3.6)<br>Other: mortality: AKI (36%) vs no AKI (8.3%). AKI stratified by RIFLE, I had the highest risk of mortality (50%), followed by F (45.5%) and R (15%). |
| Sadeghi-Bojd (2015)      | AKIN                                                        | Validation                        | General PICU population (mixed cardiac and non-cardiac), AKI of any cause | NR                                                       | Mortality                                                     | aOR: 3.04                                                                                                                                                                                                                                                                                                                                            |
| Safdar (2016)            | Plasma biomarkers                                           | Validation                        | General PICU population (only non-cardiac)                                | Serum cystatin C at PICU admission and 6, 12, 24hr later | Other (pRIFLE AKI during PICU admission)                      | Se: For AKI: cys C of 0.645mg/L at 0hr 78% Se, at 6hr 94% Se, at 12hr 94% Se<br>Sp: For AKI: cysC of 0.645mg/L at 0hr had 57% spec, at 6hr 57% spec, at 12hr 60% spec                                                                                                                                                                                |



|                          |                                                                                                                                                                               |                                                              |                                            |                                                                                                       |                                                                                                                  |                                                                                                                                                                                                                                                                                  |
|--------------------------|-------------------------------------------------------------------------------------------------------------------------------------------------------------------------------|--------------------------------------------------------------|--------------------------------------------|-------------------------------------------------------------------------------------------------------|------------------------------------------------------------------------------------------------------------------|----------------------------------------------------------------------------------------------------------------------------------------------------------------------------------------------------------------------------------------------------------------------------------|
|                          |                                                                                                                                                                               |                                                              |                                            |                                                                                                       |                                                                                                                  | AUROC: cysC at 0 hr AUROCROC 0.825 (95%CI 0.694-0.956); 6hr cysC AUROCROC 0.825 (95%CI 0.694-0.956); 12hr cysC AUROCROC 0.843 (95%CI 0.732-0.953)                                                                                                                                |
| Saleh (2017)             | Plasma biomarkers                                                                                                                                                             | Derivation                                                   | General PICU population (only non-cardiac) | Serum NGAL within 24 hours of admission                                                               | Mortality, Outcomes related to MODS                                                                              | AUROC: AUROC of NGAL to predict sepsis 0.84 (0.77-0.92) with cut point 125, AUROC of NGAL to predict mortality 0.74 (0.64-0.83) with cut point 112.5                                                                                                                             |
| Sanchez-de-Toledo (2016) | AKIN, Initiation of RRT                                                                                                                                                       | Other (Study of associations with mortality)                 | PCICU population (only cardiac)            | AKIN - at 24, 48, and 72hr after CPB surgery, RRT initiation within or after first 24hr after surgery | Mortality, Other (ICU and hospital LOS)                                                                          | NR                                                                                                                                                                                                                                                                               |
| Sanchez-Pinto (2016)     | Other (Pediatric Early Acute Kidney Injury Risk Score: a combination of clinical variables (post-op status, cardiac arrest status, BUN, pH, platelets, total bilirubin, age)) | Other (Derivation and Validation)                            | General PICU population (only non-cardiac) | First 12h of PICU admission                                                                           | Organ-specific outcomes/residual morbidity, Other (Early AKI defined by KDIGO SCr criteria after 12h and by 72h) | AUROC: Pediatric Early Acute Kidney Injury Risk Score AUROC for early AKI: Derivation= 0.84 (0.83, 0.86), Validation 1= 0.81 (0.8, 0.83), Validation 2 = 0.86 (0.85-0.88)                                                                                                        |
| Sanchez-Pinto (2015)     | KDIGO                                                                                                                                                                         | Validation                                                   | General PICU population (only non-cardiac) | Admission, Peak and trough AKI by KDIGO in first 7 days                                               | Mortality                                                                                                        | aOR: OR adjusted for PIM-2 and year of admission. Reference is no AKI group. New AKI that resolves: aOR 2.7 (95%CI 1.6, 4.7); new AKI that persists: aOR 19.4 (13.6, 27.9); AKI on admission that resolves: aOR 2.4 (1.5, 4); AKI on admission that persists: aOR 10.5 (7.6, 14) |
| Santiago (2010)          | Initiation of RRT                                                                                                                                                             | Other (General assessment of mortality risk if you get CRRT) | NR                                         | CRRT initiation                                                                                       | Mortality                                                                                                        | Other: Hazard Risk. I think there is a chance this should not be included. It only talks about patients on CRRT not about the diagnosis of renal dysfunction.                                                                                                                    |
| Scheider (2010)          | RIFLE                                                                                                                                                                         | Validation                                                   | AKI of any cause                           | At admission                                                                                          | Mortality                                                                                                        | aOR: Any AKI on Admission 5.4 (95% CI: 3.5-8.4); AKI during ICU stay: 8.7 (6.0-12.6)                                                                                                                                                                                             |
| Schroeder (2019)         | KDIGO, Plasma biomarkers                                                                                                                                                      | Derivation                                                   | PCICU population (only cardiac)            | Post CPB                                                                                              | Organ-specific outcomes/residual morbidity, Cost of medical care                                                 | Other: Pearson's                                                                                                                                                                                                                                                                 |
| Seguin (2014)            | Other (Peak cumulative fluid overload in                                                                                                                                      | Validation                                                   | PCICU population (only cardiac)            | Any time during PICU stay and PICU day 2 (POD 1)                                                      | Other (Primary: LOS and length of ventilation,                                                                   | Other: aHR for prolonged PICU LOS by day 2 cFO % 0.95 p=0.009, duration ventilation aHR 0.97 p=0.03. Peak OI correlated with peak cFO% in non-cyanotic patients.                                                                                                                 |

|                 |                                                              |            |                                                                                                                                         |                                                                                                                      |                                                                                                                                                                                                                                  |                                                                                                                                                                                                                                                                                                                                                                                                                             |
|-----------------|--------------------------------------------------------------|------------|-----------------------------------------------------------------------------------------------------------------------------------------|----------------------------------------------------------------------------------------------------------------------|----------------------------------------------------------------------------------------------------------------------------------------------------------------------------------------------------------------------------------|-----------------------------------------------------------------------------------------------------------------------------------------------------------------------------------------------------------------------------------------------------------------------------------------------------------------------------------------------------------------------------------------------------------------------------|
|                 | PICU and PICU day 2 % cumulative fluid overload)             |            |                                                                                                                                         |                                                                                                                      | Secondary: oxygenation index)                                                                                                                                                                                                    |                                                                                                                                                                                                                                                                                                                                                                                                                             |
| Seitz (2013)    | pRIFLE, Urine biomarkers, Plasma biomarkers                  | Validation | PCICU population (only cardiac)                                                                                                         | Blood biomarkers measured at 2-3hr after end of CPB and 4hr later, urine biomarkers measured 2 and 6 hours after CPB | Other (Development of AKI by pRIFLE category assessed daily in ICU)                                                                                                                                                              | AUROC: 2hr serum Cystatin C AUROC 0.741 (0.606-0.875), 6hr 0.707 (0.543-0.871) with cutoff of 0.995mg/L. Urine NGAL correlated with duration of CPB, lactate, length of stay, and duration of mechanical ventilation but not with pRIFLE score<br>Other: Spearman's correlation coefficient                                                                                                                                 |
| Selewski (2012) | Initiation of RRT, Other (Fluid overload at CRRT initiation) | Validation | General PICU population (mixed cardiac and non-cardiac)                                                                                 | NR                                                                                                                   | Mortality                                                                                                                                                                                                                        | aOR: 1.08 (1.01, 1.16) for FO at CRRT initiation, aOR FO < 10% at CRRT initiation is 0.02 (0.00,0.77)                                                                                                                                                                                                                                                                                                                       |
| Selewski (2011) | Initiation of RRT, Other (Fluid overload at CRRT initiation) | Validation | General PICU population (mixed cardiac and non-cardiac)                                                                                 | NR                                                                                                                   | Mortality                                                                                                                                                                                                                        | aOR: 1.04 (1, 1.07) for fluid overload at CRRT initiation                                                                                                                                                                                                                                                                                                                                                                   |
| Selewski (2014) | KDIGO                                                        | Validation | General PICU population (mixed cardiac and non-cardiac)                                                                                 | ICU stay                                                                                                             | Mortality, Other (LOS, LOV)                                                                                                                                                                                                      | aOR: Any AKI during ICU for mortality aOR 3.4, 95 % CI 2.0-6.0; stage 3 AKI for ICU mortality aOR 5.7, 95 % CI 3.1-10.4 (ref no AKI),<br>Other: AKI LOV 2.3 days longer than no AKI; stage 3 AKI LOV 4.2 days longer than no AKI; ICU LOS any AKI 125.0 h longer than no AKI; AKI longer hospital LOS 299.1 h than no AKI;<30 days with AKI LOV 3.6 days longer and stage 3 AKI LOV 5.1 days longer than no AKI; longer LOS |
| Selistre (2012) | Other (Comparison of eGFR formulas to measured GFR)          | Validation | Other (Patients who were referred for inulin GFR measurement. Pts needing Foley excluded, only spontaneously voiding patients included) | N/A                                                                                                                  | Other (Comparison of eGFR to mGFR. This study does not really fulfill PODIUM screening criteria but it is informative as it is a large study comparing currently used eGFR formula to measured GFR. Schwartz performed the best) | Other: Correlation coefficient (r) for modified Schwartz= 0.85; 10% accuracy 36, 30% accuracy 87; mean ratio (eGFR/mGFR)= 1.00+/-0.22                                                                                                                                                                                                                                                                                       |
| Sethi (2018)    | KDIGO                                                        | Derivation | Other (Mechanical ventilation >24 hours and arterial line)                                                                              | Admission, day 3 AKI                                                                                                 | Mortality, Organ-specific outcomes/residual morbidity                                                                                                                                                                            | Se: 81.8 (Day 3 AKI)<br>Sp: 69.6 (Day 3 AKI)<br>PPV: 56.3 (Day 3 AKI)<br>NPV: 88.9 (Day 3 AKI)<br>AUROC: 0.73 (Any RAI), 0.62 (RAI as change CrCl), 0.78 (RAI as FO), 0.66 (PRISM)                                                                                                                                                                                                                                          |

|                 |                                      |                                            |                                                              |                                                                                                                    |                                                                                      |                                                                                                                                                                                                                                                                                                                                                                                                                                             |
|-----------------|--------------------------------------|--------------------------------------------|--------------------------------------------------------------|--------------------------------------------------------------------------------------------------------------------|--------------------------------------------------------------------------------------|---------------------------------------------------------------------------------------------------------------------------------------------------------------------------------------------------------------------------------------------------------------------------------------------------------------------------------------------------------------------------------------------------------------------------------------------|
|                 |                                      |                                            |                                                              |                                                                                                                    |                                                                                      | aOR: [Mortality and FO] 5-9.99% 2.520 (1.80-7.92) 0.011 10-14.99% 2.751 (1.32-15.66) 0.041 >15% 3.675 (1.28-23.18) 0.039 (Vs <5% as standard) [Mortality and age] 1-3 years 0.173 (0.02-1.19) 0.075 3-12 years 0.301 (0.06-1.50) 0.144 12-18 years 1.471 (0.41-5.22) 0.551 (<1 year as baseline)                                                                                                                                            |
| Shalaby (2014)  | pRIFLE                               | Other (Outcomes of PICU patients with AKI) | General PICU population (only non-cardiac), AKI of any cause | pRIFLE at PICU admission or during PICU treatment                                                                  | Mortality, Organ-specific outcomes/residual morbidity                                | aOR: pRIFLE I for mortality ARR=2.76, 95%CI 0.90-4.07; pRIFLE F had ARR 2.88, 95%CI 1.38-6.04 for mortality                                                                                                                                                                                                                                                                                                                                 |
| Shi (2018)      | KDIGO                                | Derivation                                 | PCICU population (only cardiac)                              | Perioperative pGSN levels                                                                                          | Organ-specific outcomes/residual morbidity                                           | AUROC: Prediction of AKI post CPB: AUROC 6 hour pGSN - 0.79 (95% CI = 0.61-0.96); CPB Time 0.79 (95% CI = 0.51-1.00); Combined: 0.90 (95% CI = 0.75-1.02, P = 0.01)<br>aOR: Post CPB AKI: CPB Time: 1.06 (1.01-1.19) p = 0.01, cross-clamp time: 0.88 (0.74-1.06) p = 0.18; pGSN 6 hours post: 0.05 (0.01-0.78) p = 0.03                                                                                                                    |
| Shime (2001)    | Other modified SOFA (mSOFA)          | Validation                                 | PCICU population (only cardiac)                              | Admission, 12hr, 36hr postoperatively after cardiac surgery                                                        | Mortality, Other (Length of PICU stay, length of ventilation, catecholamine support) | Other: Renal subscores were low and little analysis done on these                                                                                                                                                                                                                                                                                                                                                                           |
| Sinitksy (2015) | Other (Fluid overload %)             | Validation                                 | General PICU population (only non-cardiac)                   | FO% at 48 hours                                                                                                    | Mortality, Organ-specific outcomes/residual morbidity                                | aOR: FO% independent association with poor outcome                                                                                                                                                                                                                                                                                                                                                                                          |
| Soler (2013)    | pRIFLE, Other (Fluid overload >=10%) | Validation                                 | General PICU population (only non-cardiac)                   | Up to 14 days after PICU admission                                                                                 | Mortality, Other (Length of hospital and ICU stay)                                   | aOR: Length of ICU stay >=15d association with pRIFLE I or F category: 4.16 (1.72-10.06)                                                                                                                                                                                                                                                                                                                                                    |
| Soni (2015)     | pRIFLE, AKIN                         | Validation                                 | General PICU population (only non-cardiac)                   | NR                                                                                                                 | Mortality, Other patient-centered outcomes                                           | Other: t-test and chi-square comparisons                                                                                                                                                                                                                                                                                                                                                                                                    |
| SooHoo (2018)   | KDIGO                                | Validation                                 | PCICU population (only cardiac)                              | POD 0-4                                                                                                            | Mortality, Other (Duration ventilation, LOS)                                         | Other: Descriptive statistics: ICU LOS (p=0.002 fluid corrected Cr) and ventilation (p=0.0006 for fluid corrected Cr) longer in those with AKI, no mortality difference                                                                                                                                                                                                                                                                     |
| Stanski (2019)  | Urine biomarkers                     | Validation                                 | General PICU population (only non-cardiac)                   | NR                                                                                                                 | Organ-specific outcomes/residual morbidity                                           | aOR: 2.2-3.0 for poor outcome for NGAL+/Cr- vs. NGAL-/Cr- and similar to NGAL-/Cr+                                                                                                                                                                                                                                                                                                                                                          |
| Sugimoto (2016) | pRIFLE, Urine biomarkers             | Validation                                 | PCICU population (only cardiac)                              | Urine sample collected at ICU admission after CPB, daily creatinine measurements for assignment for RIFLE category | NR                                                                                   | Se: 81.90%<br>Sp: 46.70%<br>PPV: 74.10%<br>NPV: 58.20%<br>AUROC: Urine albumin for AKI 0.71, p<0.0001, cutoff 5.1mcg/mL<br>Other: Patients with AKI had longer ICU stays (median 5 vs 3 days, p<0.001) and longer duration mechanical ventilation (median 29 vs 6hr, p<0.001) compared to those without AKI. Correlation coefficient for urine albumin with AKI adjusted for age, CPB time, and RACHS-1 category was 0.007888 with p=0.0365 |

|                                          |                                                                                                                                               |                                                                                                                            |                                                         |                                                                                |                                                                                           |                                                                                                                                    |
|------------------------------------------|-----------------------------------------------------------------------------------------------------------------------------------------------|----------------------------------------------------------------------------------------------------------------------------|---------------------------------------------------------|--------------------------------------------------------------------------------|-------------------------------------------------------------------------------------------|------------------------------------------------------------------------------------------------------------------------------------|
| Sutherland (2015)                        | pRIFLE, AKIN, KDIGO                                                                                                                           | Validation                                                                                                                 | AKI of any cause                                        | Anytime during hospitalization                                                 | Mortality, Other patient-centered outcomes                                                | LR: Various mortality LRs depending on definition and AKI stage (table on page 558). Same is true for LOS.                         |
| Sutherland (2010)                        | Other (Fluid overload is being assessed at CRRT initiation as a predictor of mortality among children with AKI severe enough to warrant CRRT) | Derivation                                                                                                                 | General PICU population (mixed cardiac and non-cardiac) | At CRRT initiation                                                             | Mortality, Other patient-centered outcomes                                                | aOR: For % FO = 1.03 (3% increase in mortality for each 1% increase in FO%)                                                        |
| Symons (2007)                            | Other (Was a paper to describe demographics of patients on CRRT. They looked at various factors associated with mortality)                    | Other (Was a paper to describe demographics of patients on CRRT. They looked at various factors associated with mortality) | General PICU population (mixed cardiac and non-cardiac) | Around CRRT treatment                                                          | Mortality                                                                                 | Other: Only univariable analyses were done                                                                                         |
| Tanyildiz (2017)                         | pRIFLE, AKIN                                                                                                                                  | Validation                                                                                                                 | PCICU population (only cardiac)                         | pRIFLE and AKIN scores determined postop after cardiac surgery within 48 hours | Mortality                                                                                 | Other: Unadjusted OR for mortality: pRIFLE 15.1 (7.2-30.4) p<0.001, AKIN 11.2 (6.1-24.7) p<0.001                                   |
| Thakkar (2018)                           | pRIFLE, AKIN                                                                                                                                  | Validation                                                                                                                 | General PICU population (mixed cardiac and non-cardiac) | At admission, 6, 12, 24, 48hr after admission, then daily                      | Mortality                                                                                 | Other: Descriptive statistics only, demonstrated higher mortality with both pRIFLE and AKIN vs no AKI by Chi2 test (p=0.001-0.005) |
| Torres de Melo Bezerra Cavalcante (2016) | KDIGO, Urine biomarkers, Other (Renal Angina Index)                                                                                           | Derivation                                                                                                                 | PCICU population (only cardiac)                         | NR                                                                             | Mortality, Organ-specific outcomes/residual morbidity, Other (Length of stay, severe AKI) | Other: Biomarker (syndecan-1 improved AUROC to predict severe AKI from clinical model of 0.81 to 0.87)                             |
| Ueno (2019)                              | Other (Neonatal KDIGO)                                                                                                                        | Validation                                                                                                                 | PCICU population (only cardiac)                         | 7 days                                                                         | Mortality, Organ-specific                                                                 | aOR: Stage 3 neonatal AKI OR for death 16 (1.6-162.1, p=0.02)                                                                      |

|                   |                                                                                                                      |                                                                                           |                                                               |                                                                                    |                                                                                                             |                                                                                                                                                                                                                                                                                                                                                                                                                                                                                                                                                                                                                                                                            |
|-------------------|----------------------------------------------------------------------------------------------------------------------|-------------------------------------------------------------------------------------------|---------------------------------------------------------------|------------------------------------------------------------------------------------|-------------------------------------------------------------------------------------------------------------|----------------------------------------------------------------------------------------------------------------------------------------------------------------------------------------------------------------------------------------------------------------------------------------------------------------------------------------------------------------------------------------------------------------------------------------------------------------------------------------------------------------------------------------------------------------------------------------------------------------------------------------------------------------------------|
|                   |                                                                                                                      |                                                                                           |                                                               |                                                                                    | outcomes/residual morbidity                                                                                 |                                                                                                                                                                                                                                                                                                                                                                                                                                                                                                                                                                                                                                                                            |
| Vaewpanich (2019) | pRIFLE, Other (Fluid overload and FOKIS)                                                                             | Validation                                                                                | General PICU population (only non-cardiac)                    | NR                                                                                 | Organ-specific outcomes/residual morbidity                                                                  | aOR: AKI OR for VAC = 2.15 (95th 1.39-3.31), peak % FO OR for VAC = 1.22 (9th 1.08-1.37), peak FOKIS OR for VAC 1.29 (1.13-1.47)                                                                                                                                                                                                                                                                                                                                                                                                                                                                                                                                           |
| Valentine (2012)  | Other (Cumulative fluid balance at study day 3)                                                                      | Validation                                                                                | Other (Acute lung injury (PF<300, bilateral CXR infiltrates)) | Day 3 of study                                                                     | Other (Ventilator-free days)                                                                                | Other: Adjusted linear regression coefficient -0.02, p=0.01                                                                                                                                                                                                                                                                                                                                                                                                                                                                                                                                                                                                                |
| Vassalos (2011)   | Plasma biomarkers, Other (Cystatin C compared to measured CrCl, renal dysfunction defined as GFR <55 ml/min/1.73 m2) | Other (This study looks at CBP and perfusion to predict AKI, it is not a prognostic tool) | Other (CPB)                                                   | 24 hrs within CPB                                                                  | Other (CCI; LOS in ICU and hospital, length of ventilation)                                                 | Se: Day-1 cystatin C > 1.044 mg/l 100% sensitivity for detecting renal dysfunction, defined as GFR <55 ml/min/1.73 m2, day-1 creatinine >34 sensitivity 85% for the same outcome<br>Sp: Day-1 cystatin C > 1.044 mg/l 67% specificity for detecting renal dysfunction ( GFR <55 ml/min/1.73 m2, day 1 Cr > 34 specificity 88% for the same outcome<br>Other: Correlation of cystatin C with 0-12h CCI and 12-24h CCL, correlation of cystatin C with hospital LOS r = 0.73, P < 0.001;                                                                                                                                                                                     |
| Volovelsky (2018) | KDIGO, Plasma biomarkers                                                                                             | Derivation                                                                                | PCICU population (only cardiac)                               | Pre-surgery, once more 12-24 hours after surgery                                   | Organ-specific outcomes/residual morbidity                                                                  | AUROC: FGF23 (preop) had AUROC of 0.73. FGF23 (postop) had AUROC of 0.79. This is to predict severe (KDIGO stage 2/3) AKI                                                                                                                                                                                                                                                                                                                                                                                                                                                                                                                                                  |
| Volpon (2015)     | Plasma biomarkers                                                                                                    | Validation                                                                                | General PICU population (only non-cardiac), AKI of any cause  | Days 1-2 of PICU admission                                                         | Other (AKI defined by pRIFLE, ICU length of stay, duration of mechanical ventilation)                       | AUROC: Of cystatin C for AKI detection: 0.89; A serum cystatin C >0.70 was associated with a longer length of PICU stay (adjusted hazard ratio of 1.64) and duration of mechanical ventilation (adjusted hazard ratio, 1.82).                                                                                                                                                                                                                                                                                                                                                                                                                                              |
| Volpon (2016)     | pRIFLE, KDIGO                                                                                                        | NR                                                                                        | General PICU population (mixed cardiac and non-cardiac)       | 28 days of PICU stay                                                               | Mortality, Organ-specific outcomes/residual morbidity, Other (LOS, LOV)                                     | aOR: Cox so aHR: PICU LOS: pRIFLE Risk 0.63 (0.40-0.99), Injury 0.39 (0.23-0.66), Failure 0.21 (0.12-0.35), KDIGO Stage 1 0.58 (0.35-0.96), Stage 2 0.47 (0.27-0.81), Stage 3 0.22 (0.13-0.36). LOV Risk 0.74 (0.47-1.18), Injury 0.47 (0.28-0.80), Failure 0.25 (0.15-0.43), KDIGO Stage 1 0.72 (0.43-1.21) Stage 2 0.58 (0.34-1.00) Stage 3 0.27 (0.16-0.44) ref no AKI for all<br>Other: aRR for pRIFLE F for eCCL<75 at ICU d/c 1.86 (0.98-3.51) (ref R/I); KDIGO for same outcome aRR Stage 3 1.71 (0.85-3.42) (ref Stg 1 and 2); aRR for mortality R/I 0.55 (0.06-5.18), F0.86 (0.09-7.92), KDIGO Stage 1 and 20.48 (0.04-5.17), stage 3 0.98 (0.11-8.92) ref no AKI |
| Wai (2013)        | Urine biomarkers                                                                                                     | Validation                                                                                | Other (PICU patient with septic shock or requiring ECMO)      | Urine biomarker panel at PICU admission, peak of illness and resolution of illness | Mortality, Other (AKI defined as eCCI 50% below normal and/or UOP less than 0.5ml/kg/hr for 16 hours in the | Se: Admission uNGAL 1,544ng/mg 84% sens for AKI; admit uFGF-2 21.65pg/mg had 79% sens for AKI; uEGF of 31,598pg/mg had 47% Se for AKI<br>Sp: Admission uNGAL 1,544ng/mg had 80% spec for AKI; admit uFGF-2 of 21.65pg/mg had 63% spec for AKI; admission uEGF of 31,598 had 94% spec for AKI                                                                                                                                                                                                                                                                                                                                                                               |

|                 |                                                                                                                                                                                               |                                   |                                                         |                                         |                                                                                                 |                                                                                                                                                                                                                                                                                                                                                                                                                                                                                                                                                                                                                                                                                                                                                                                                                                                                                                                                                                                                                                                                                                                                                                                                                                                                                                                                                                                                       |
|-----------------|-----------------------------------------------------------------------------------------------------------------------------------------------------------------------------------------------|-----------------------------------|---------------------------------------------------------|-----------------------------------------|-------------------------------------------------------------------------------------------------|-------------------------------------------------------------------------------------------------------------------------------------------------------------------------------------------------------------------------------------------------------------------------------------------------------------------------------------------------------------------------------------------------------------------------------------------------------------------------------------------------------------------------------------------------------------------------------------------------------------------------------------------------------------------------------------------------------------------------------------------------------------------------------------------------------------------------------------------------------------------------------------------------------------------------------------------------------------------------------------------------------------------------------------------------------------------------------------------------------------------------------------------------------------------------------------------------------------------------------------------------------------------------------------------------------------------------------------------------------------------------------------------------------|
|                 |                                                                                                                                                                                               |                                   |                                                         |                                         | absence of existing renal disease)                                                              | PPV: All three biomarkers admission PPV 0.85 for AKI<br>NPV: 0.93<br>AUROC: Admission uNGAL for AKI AUROC 0.82 (95%CI 0.704 to 0.964); uFGF-2 at admission AUROC 0.74 (95%CI 0.58-0.90) for AKI; Admission uEGF AUROC for AKI 0.73 (95%CI 0.58-0.90); all three at admission for AKI AUROC 0.94 (95%CI 0.81-0.99)                                                                                                                                                                                                                                                                                                                                                                                                                                                                                                                                                                                                                                                                                                                                                                                                                                                                                                                                                                                                                                                                                     |
| Wang (2017)     | Other (A EMR-based AKI screening tool that includes age, medication exposures, platelet count, red blood cell distribution width, serum phosphorus, serum transaminases, hypotension, and pH) | Other (Derivation and validation) | General PICU population (mixed cardiac and non-cardiac) | It is not clear from reading the study. | Other (AKI prediction. AKI was defined as 1.5 fold or a 0.3 mg/dL increase in serum creatinine) | Other: Their ICU prediction model had a C-statistic of 0.74 (95% confidence interval of 0.71-0.77)                                                                                                                                                                                                                                                                                                                                                                                                                                                                                                                                                                                                                                                                                                                                                                                                                                                                                                                                                                                                                                                                                                                                                                                                                                                                                                    |
| Washburn (2008) | pRIFLE, Urine biomarkers                                                                                                                                                                      | Validation                        | General PICU population (only non-cardiac)              | PICU admission                          | Mortality, Other (AKI, prolonged AKI)                                                           | Se: For urine IL-18 to predict AKI within 24 hours for cutoffs ranging from >50 to >200 pg/ml, 38 to 13%; for urine il-18 to predict AKI duration > 48 hours, for cutoffs ranging from >50 to >200 pg/L, ranged from 68 to 21%.<br>Sp: For urine IL-18 to predict AKI within 24 hours for cutoffs ranging from >50 to >200 pg/ml, 78 to 89%; for urine il-18 to predict AKI duration > 48 hours, for cutoffs ranging from >50 to >200 pg/L, ranged from 50 to 93%.<br>PPV: For urine IL-18 to predict AKI within 24 hours for cutoffs ranging from >50 to >200 pg/ml, 27 to 20%; for urine il-18 to predict AKI duration > 48 hours, for cutoffs ranging from >50 to >200 pg/L, ranged from 77 to 88%.<br>NPV: For urine IL-18 to predict AKI within 24 hours for cutoffs ranging from >50 to >200 pg/ml, 85 to 82%; for urine il-18 to predict AKI duration > 48 hours, for cutoffs ranging from >50 to >200 pg/L, ranged from 39 to 33%.<br>AUROC: Urine IL-18 to predict AKI within 24 hours of collection: AUROC = 0.54 (0.31 to 0.77); to predict prolonged AKI when measured on AKI day: 0.61 (0.43 to 0.78)<br>aOR: Uil-18 For association with mortality: aOR 1.29, 95% CI = 1.01-1.64; urine IL-18 for predicting AKI within 28 hours: aOR 3.7, 95% CI = 1.4 to 9.5; when EXCLUDING sepsis patients urine IL-18 predicted AKI within 48 hours with adjusted OR 5.23, 95% CI = 1.61 to 16.84; |
| Westhoff (2016) | Urine biomarkers,                                                                                                                                                                             | Validation                        | Other (PICU/NICU/inpatient)                             | Urine collected immediately after AKI   | Other (Intrinsic AKI determined by                                                              | Se: Calprotectin 0.46, NGAL 0.84, KIM-1 0.55<br>Sp: Calprotectin 0.86, NGAL 0.89, KIM-1 0.97                                                                                                                                                                                                                                                                                                                                                                                                                                                                                                                                                                                                                                                                                                                                                                                                                                                                                                                                                                                                                                                                                                                                                                                                                                                                                                          |

|                 |                                                                                                                                                                                      |            |                                                                                                                                                                     |                                                                                                          |                                                                         |                                                                                                                                                                                                                                                                                                                                                                                                                 |
|-----------------|--------------------------------------------------------------------------------------------------------------------------------------------------------------------------------------|------------|---------------------------------------------------------------------------------------------------------------------------------------------------------------------|----------------------------------------------------------------------------------------------------------|-------------------------------------------------------------------------|-----------------------------------------------------------------------------------------------------------------------------------------------------------------------------------------------------------------------------------------------------------------------------------------------------------------------------------------------------------------------------------------------------------------|
|                 | Other (Calprotectin, NGAL, KIM-1)                                                                                                                                                    |            | t with AKI and healthy controls)                                                                                                                                    | diagnosis or on admission for those with established AKI, or as soon as possible in patients with anuria | physician consensus)                                                    | PPV: Calprotectin 0.68, NGAL 0.82, KIM-1 0.91<br>NPV: Calprotectin 0.71, NGAL 0.90, KIM-1 0.77<br>AUROC: Calprotectin 0.78, NGAL 0.93, KIM-1 0.76                                                                                                                                                                                                                                                               |
| Westhoff (2015) | Urine biomarkers                                                                                                                                                                     | Validation | General PICU population (mixed cardiac and non-cardiac), AKI of any cause, Other (NICU and PICU controls without AKI, controls from outpatient clinics without AKI) | Urine sample collected immediately after hospital admission                                              | Mortality, Organ-specific outcomes/residual morbidity                   | Se: 30d mortality (threshold 0.56): 100%, 3mo mortality (threshold 3.78): 71.4%, RRT: 43.8%<br>Sp: 30d mortality: 50%, 3mo mortality: 84.6%, RRT: 93.6%<br>PPV: 30d mortality: 23.1%, 3mo mortality: 45.5%, RRT: 70.0%<br>NPV: 30d mortality: 23.1%, 3mo mortality: 94.3%, RRT: 83.0%<br>AUROC: 30d mortality: 0.84 (0.70-0.98), 3mo mortality: 0.88 (0.75-1.00), RRT: 0.75 (0.60-0.89)                         |
| Westhoff (2017) | Urine biomarkers, Other (Urine calprotectin, kidney injury molecule-1 (KIM-1), and neutrophil gelatinase-associated lipocalin (NGAL))                                                | Derivation | General PICU population (mixed cardiac and non-cardiac), AKI of any cause, Other (Inpatient and clinic)                                                             | At AKI diagnosis or on admission with AKI                                                                | Mortality, Organ-specific outcomes/residual morbidity, Other (RRT need) | AUROC: In AKI patients mortality at 30days : uNGAL AUROC=0.79; uCalprotectin AUROC =0.55, KIM-1 AUROC=0.55; In AKI patients need for RRT : uNGAL AUROC=0.79; uCalprotectin AUROC=0.55, KIM-1 AUROC=0.55. In No AKI patients mortality at 30days : uNGAL AUROC=0.84; uCalprotectin AUROC =0.60, KIM-1 AUROC=0.63; In No AKI patients need for RRT : uNGAL AUROC=0.73; uCalprotectin AUROC=0.75, KIM-1 AUROC=0.76 |
| Wheeler (2008)  | Plasma biomarkers, Other (A blood urea nitrogen (BUN) concentration > 100 mg/ dL, serum creatinine > 2 mg/dL in the absence of pre-existing renal disease, or the need for dialysis) | Other (NR) | Other (SIRS and septic shock with controls)                                                                                                                         | First 24h of PICU                                                                                        | Mortality                                                               | AUROC: Serum NGAL on admission for AKI 0.677 (95% C.I. 0.557, 0.786)<br>aOR: Serum creatinine for AKI, aOR 66.8, 95% C.I. 6.9 - 640.4<br>Other: Crude mortality in AKI 18.2% vs 6.6% in nonAKI, p=0.2; NGAL in survivors (median, 188 ng/ mL, IQR 107-395 ng/mL) vs non-survivors (median, 295 ng/mL, IQR 131-933 ng/mL; p=0.2)                                                                                 |

|                 |                                                                                                          |                                   |                                                                                           |                                                                        |                                                                                                                                                                        |                                                                                                                                                                                                                                                                                                                                                                                                                                                                                                                              |
|-----------------|----------------------------------------------------------------------------------------------------------|-----------------------------------|-------------------------------------------------------------------------------------------|------------------------------------------------------------------------|------------------------------------------------------------------------------------------------------------------------------------------------------------------------|------------------------------------------------------------------------------------------------------------------------------------------------------------------------------------------------------------------------------------------------------------------------------------------------------------------------------------------------------------------------------------------------------------------------------------------------------------------------------------------------------------------------------|
| Wilder (2016)   | Other (Weight based fluid overload)                                                                      | Validation                        | PCICU population (only cardiac)                                                           | First 7 post-operative days after cardiac surgery                      | Other (A composite poor clinical outcome which was defined as death, need for renal replacement therapy, or extracorporeal life support within 30 post-operative days) | aOR: Fluid overload greater than or equal to 16% (adjusted odds ratio of 3.7) and a serum creatinine greater than or equal to 0.9 (adjusted odds ratio of 6.6) on post-operative day 3 remained an independent risk factor for mortality.                                                                                                                                                                                                                                                                                    |
| Wong (2015)     | Plasma biomarkers, Other (Decision tree using the following biomarkers: ELA2, FGF13, MMP8, OLFM4, PRTN3) | Other (Derivation and Validation) | Other (PICU population with septic shock (unclear if cardiac included))                   | Day 1 of PICU admission                                                | Other (Stage 2 or greater AKI (modification of KDIGO - 2x baseline creatinine) at day 3 of PICU admission)                                                             | Se: Derivation 0.93, validation 0.85<br>Sp: Derivation 0.88, validation 0.77<br>PPV: Derivation 0.51, validation 0.29<br>NPV: Derivation 0.99, validation 0.98<br>AUROC: Derivation 0.95, validation 0.83                                                                                                                                                                                                                                                                                                                    |
| Xu (2018)       | pRIFLE, KDIGO, Other (pROCK (reference change value of SCr optimized for AKI))                           | Derivation                        | Other (General hospital population without AKI on admission and without AKI risk factors) | Two SCr measurements within 7 days at any point during hospitalization | Mortality                                                                                                                                                              | Se: 29% for 15d mortality in ICU patients (CI 24-35%)<br>AUROC: 0.708 for 15d mortality in ICU patients                                                                                                                                                                                                                                                                                                                                                                                                                      |
| Yavuz (2014)    | Urine biomarkers, Plasma biomarkers                                                                      | Validation                        | Other (Burns involving >10% BSA; controls were healthy (source not specified))            | Blood and urine NGAL levels at PICU admission and fifth hospital day   | Other (pRIFLE R, I or F)                                                                                                                                               | Se: Admission sNGAL 315ng/mL had 71.4% sensitivity for AKI; uNGAL of 100ng/mL had 83.3% sensitivity for AKI<br>Sp: Admission sNGAL of 315ng/mL had 93.3% specificity for AKI; uNGAL of 100ng/mL had 93.7% specificity for AKI<br>PPV: Admission sNGAL 315ng/mL had 83.3% PPV for AKI; uNGAL 100ng/mL had 83.3% PPV for AKI<br>NPV: Admission sNGAL of 315ng/mL had 87.5% NPV for AKI; uNGAL of 100ng/mL had 93.7% NPV for AKI<br>AUROC: Admission sNGAL for AKI AUROC 0.94 (95%CI 0-1); uNGAL for AKI AUROC 0.96 (95%CI 0-1) |
| Yoneyama (2019) | KDIGO, Urine biomarkers                                                                                  | Derivation                        | PCICU population (only cardiac), AKI of any cause                                         | Biomarkers at PCICU admission, 4, 12, 24 hours later.                  | Organ specific outcomes/residual morbidity, Other (Length of stay and Length of intubation)                                                                            | Se: L-FABP sensitivity for AKI prediction was 0.64 at ICU admission. NGAL sensitivity for AKI prediction was 0.73 at ICU admission.<br>Sp: L-FABP specificity for AKI prediction was 0.93 at ICU admission. NGAL specificity for AKI prediction was 0.73 at ICU admission.<br>AUROC: L-FABP best AUROC for AKI prediction was 0.82 at ICU admission. NGAL best AUROC was 0.9 at ICU admission.                                                                                                                               |



|                   |                                                                                                                                                           |            |                                                         |                                                                                   |                                                                                                    |                                                                                                                                                                                                                                                                                                                                                                                                                                                                                                                                                                                                                                                                                                                                                                                                                                                                                                                                                                                                                                                                                                                           |
|-------------------|-----------------------------------------------------------------------------------------------------------------------------------------------------------|------------|---------------------------------------------------------|-----------------------------------------------------------------------------------|----------------------------------------------------------------------------------------------------|---------------------------------------------------------------------------------------------------------------------------------------------------------------------------------------------------------------------------------------------------------------------------------------------------------------------------------------------------------------------------------------------------------------------------------------------------------------------------------------------------------------------------------------------------------------------------------------------------------------------------------------------------------------------------------------------------------------------------------------------------------------------------------------------------------------------------------------------------------------------------------------------------------------------------------------------------------------------------------------------------------------------------------------------------------------------------------------------------------------------------|
|                   |                                                                                                                                                           |            |                                                         |                                                                                   |                                                                                                    | Other: P values used to assess ability of LFABP and NGAL to predict intubation period, ICU LOS, hospital LOS.                                                                                                                                                                                                                                                                                                                                                                                                                                                                                                                                                                                                                                                                                                                                                                                                                                                                                                                                                                                                             |
| Youssef (2013)    | Plasma biomarkers                                                                                                                                         | Validation | General PICU population (mixed cardiac and non-cardiac) | 1 <sup>st</sup> and 3 <sup>rd</sup> day of ICU admission                          | Organ-specific outcomes/residual morbidity                                                         | Se: For day 0 serum NGAL detection of AKI (by RIFLE criteria), cutoff 89.5ng/mL: 84.6%<br>Sp: 59.06%<br>PPV: 36.70%<br>NPV: 68.40%<br>AUROC: 0.63 (0.50-0.77)                                                                                                                                                                                                                                                                                                                                                                                                                                                                                                                                                                                                                                                                                                                                                                                                                                                                                                                                                             |
| Zappitelli (2015) | AKIN, Plasma biomarkers                                                                                                                                   | Validation | PCICU population (only cardiac)                         | Post-op AKI                                                                       | Other (AKI by SCr; AKI by CysC definition; ICU and hospital LOS; duration of ventilation)          | AUROC: For first post-op biomarkers to predict Scr-AKI and CysC AKI: uIL-18 0.66 (0.59-0.72) & 0.74 (0.67-0.81); urine NGAL 0.69 (0.63-0.75) & 0.66 (0.59-0.74); uKIM1 0.58 (0.51-0.65) & 0.65 (0.57-0.72); uLFABP 0.66 (0.59-0.72) & 0.68 (0.60-0.76). These are in "per ml", corrected for urine creatinine available in manuscript.<br>Other: Associations of SCr-AKI and CysC-AKI in multivariable analyses associated with length ICU stay, hospital stay and ventilation duration with p value<=0.008.                                                                                                                                                                                                                                                                                                                                                                                                                                                                                                                                                                                                              |
| Zappitelli (2012) | AKIN, Urine biomarkers                                                                                                                                    | Validation | PCICU population (only cardiac)                         | Pre io, post-op AKI                                                               | Other (Hospital and ICU length of; post-op AKI)                                                    | Se: < 2 year olds, optimal cutoff first post-op uACR, Se, Sp, LR+, LR-, PPV and NPV to predict AKI: >618, 0.71, 0.60, 1.80, 0.49, 0.34, 0.87, respectively. >2 year olds, optimal cutoff first post-op uACR, Se, Sp, LR+, LR-, PPV and NPV to predict AKI: >289, 0.60, 0.79, 2.90, 0.51, 0.22, 0.95, respectively.<br>Sp: See Se<br>PPV: See Se<br>NPV: See Se<br>LR: See Se<br>AUROC: For first post-op urine ACr <=0.63 to predict aki in < and >- 2 years.<br>aOR: Actually was the RR: highest preop urine ACR tertile group, ONLY in >2 year olds, associated with post-op Stage 2 AKI: aRR 2.82 (0.82 ,9.71)                                                                                                                                                                                                                                                                                                                                                                                                                                                                                                        |
| Zappitelli (2011) | AKIN, Plasma biomarkers, Other (First post-operative serum cystatin C; first postop % Cysc change from baseline; first post-op %SCr change from baseline) | Validation | PCICU population (only cardiac)                         | First post-operative value; AKI evaluated throughout all of postop PICU admission | Other (PICU LOS; Hospital LOS; duration of mechanical ventilation; AKI itself was also an outcome) | AUROC: First postop CysC associated with AKI (aAUROC 0.81) and Stage 2 AKI (aAUROC 0.89); %Cysc Change from baseline predicted AKI (aAUROC 0.8) and Stage 2 AKI (aAUROC 0.88); % Scr change from baseline first postop predicted AKI (aAUROC 0.83) and Stage 2 AKI (aAUROC 0.84).<br>aOR: 5th quintile of first post-op CysC predicted AKI (aOR 6, 95% CI 1.5-23.3) and stage 2 AKI (aOR 17.2, 95% CI 1.6,34.6); first postop third tertile cysc change from baseline predicted AKI (aOR 4.4 95% CI 1.8-10.8) and Stage 2 AKI (aOR 5.7 95% CI 1.4-24); first postop % SCr change from baseline 3rd tertile predicted AKI (aOR 9.6 95% CI 2.4-39) but not stage 2 AKI<br>Other: Multiple linear regression: first postop CysC change from baseline (p=0.04) and first post-op CysC (p<0.001) (not percent SCr change from baseline) associated with longer ventilation. First post-op cystatin C associated with longer hospital stay (p<0.04); first postop cystatin C association with hospital LOS (p=0.04); first post op SCr change from baseline (p=0.02) and first post-op cysc (p=0.002) associated with PICU LOS. |
| Zappitelli (2009) | pRIFLE, Other (25%)                                                                                                                                       | Validation | PCICU population (only cardiac)                         | Throughout postop PICU admission                                                  | Other (PICU LOS; Hospital LOS;                                                                     | Other: Adjusted HR's (LOWER HR means association with outcome): AKI associated with PICU LOS (aHR 0.7[0.5-0.9]), and days of                                                                                                                                                                                                                                                                                                                                                                                                                                                                                                                                                                                                                                                                                                                                                                                                                                                                                                                                                                                              |

|                   |                                                                                                                                                                                                                  |                                                                     |                                                             |                                                 |                                                                           |                                                                                                                                                                                                                                                                                                                                                                                                                                                                                                                                                                                                        |
|-------------------|------------------------------------------------------------------------------------------------------------------------------------------------------------------------------------------------------------------|---------------------------------------------------------------------|-------------------------------------------------------------|-------------------------------------------------|---------------------------------------------------------------------------|--------------------------------------------------------------------------------------------------------------------------------------------------------------------------------------------------------------------------------------------------------------------------------------------------------------------------------------------------------------------------------------------------------------------------------------------------------------------------------------------------------------------------------------------------------------------------------------------------------|
|                   | postop rise in SCr from baseline)                                                                                                                                                                                |                                                                     |                                                             |                                                 | duration of ventilation)                                                  | ventilation (aHR 0.7 [0.6-0.9]). 25% post-op SCr rise from baseline - similar results                                                                                                                                                                                                                                                                                                                                                                                                                                                                                                                  |
| Zappitelli (2007) | pRIFLE, Urine biomarkers                                                                                                                                                                                         | Validation                                                          | General PICU population (mixed cardiac and non-cardiac)     | Throughout PICU admission                       | Mortality, Other (AKI, AKI>48 hours; mortality; presence of sepsis)       | Se: Urine NGAL lowest cutoff (0.05 ng/mg) Se/Sp for AKI: 85%/89% and for AKI 48 hours 44%/ 42%; at highest cutoff (1.5 ng/mg) Se/Sp for AKI: 54%/56% and 97%/92%<br>Sp: See sensitivity section<br>AUROC: NGAL to predict AKI within 48 hours of collection: AUROC 0.78 (95% confidence interval [CI] 0.62 to 0.95); to predict AKI over 48 hrs: 0.79 (95% CI 0.61 to 0.98) AUROC from day of AKI to predict prolonged AKI: 0.63 (95% CI 0.44 to 0.82), and to predict worsening of AKI: 0.61 (95% CI 0.32 to 0.89)<br>Other: Multivariate analyses not done for mortality and other clinical outcomes |
| Zheng (2013)      | Urine biomarkers, Other (Urine neutrophil gelatinase-associated lipocalin (NGAL), interleukin-18 (IL-18), microalbumin (MA), N-acetyl-β-D-glucosaminidase (NAG), α1-microglobulin (α1-MG), and creatinine (UCr)) | Validation                                                          | PCICU population (only cardiac)                             | Baseline, 4h, 6h, 12h, 24h after CPB            | Organ specific outcomes/residual morbidity, Other (AKI per AKIN criteria) | AUROC: Urine NGAL at 4h AUROC for AKI=0.857 (0.753-0.961); Urine IL-18 at 4h AUROC for AKI=0.835 (0.729-0.940); Urine NGAL at 6h AUROC for AKI=0.859 (0.756-0.961); Urine IL-18 at 6h AUROC for AKI=0.766 (0.644-0.888). Other markers and time points with lower performance.                                                                                                                                                                                                                                                                                                                         |
| Zinter (2020)     | Other (Pre-stem cell transplant renal injury (Cr>2 or use of dialysis or prior renal transplant))                                                                                                                | Other (Predictive modeling of mortality/risk factor identification) | Other (Allogeneic stem cell transplant with PICU admission) | Prior to transplant                             | Mortality                                                                 | aOR: 3.39 (95% CI 1.88-6.13)                                                                                                                                                                                                                                                                                                                                                                                                                                                                                                                                                                           |
| Zwiers (2015)     | Urine biomarkers                                                                                                                                                                                                 | Validation                                                          | General PICU population (mixed cardiac and non-             | At intervals between ECMO initiation and 6 days | Mortality, Organ-specific                                                 | Other: Standard t-testing                                                                                                                                                                                                                                                                                                                                                                                                                                                                                                                                                                              |

|  |  |  |                                                                     |  |                                |  |
|--|--|--|---------------------------------------------------------------------|--|--------------------------------|--|
|  |  |  | cardiac), Other<br>(Children < 1 year of<br>age who needed<br>ECMO) |  | outcomes/residual<br>morbidity |  |
|--|--|--|---------------------------------------------------------------------|--|--------------------------------|--|

Abbreviations: Se, sensitivity; Sp, specificity; PPV, positive predictive value; NPV, negative predictive value; LR, likelihood ratio; AUROC, area under the receiver operating characteristics curve; aOR, adjusted odds ratio; PICU, pediatric intensive care unit; PCICU, pediatric cardiac intensive care unit

**Supplemental Table 3. Literature Supporting Association of Existing Acute Kidney Injury Scores and Outcome**

| Proposed Criteria                                                                           | Number of Studies                                                                                                                                      | Types of Studies                                                            | Setting (type of ICU <sup>a</sup> )                                                                            | Patient Population                                                                                                              | Outcomes Studied                                                                                   |
|---------------------------------------------------------------------------------------------|--------------------------------------------------------------------------------------------------------------------------------------------------------|-----------------------------------------------------------------------------|----------------------------------------------------------------------------------------------------------------|---------------------------------------------------------------------------------------------------------------------------------|----------------------------------------------------------------------------------------------------|
| Urine output <0.5mL/kg/hr for ≥6 hours AND serum creatinine increase 1.5-1.9 times baseline | AKIN <sup>c</sup> = 8<br>(References 7, 52, 97, 100, 135, 161, 163, 189)                                                                               | Retrospective cohort = 4<br>Prospective cohort = 4                          | Mixed = 3<br>Non-cardiac = 1<br>Cardiac = 4                                                                    | n = 2106, 14795, 54, 303, 211, 1489, 287, 137<br><br>Total = 19,382                                                             | Mortality, length of stay, duration of mechanical ventilation                                      |
| OR ≥0.3mg/dL (≥26.5 μmol/L)                                                                 | RIFLE <sup>d</sup> or pRIFLE <sup>e</sup> = 20<br>(References 3, 8, 12, 13, 32, 36, 55, 65, 85, 100, 104, 131, 142, 151, 155, 161, 163, 164, 171, 186) | Retrospective cohort = 11<br>Prospective cohort = 8<br>Case-control = 1     | Mixed = 5<br>Non-cardiac = 4<br>Cardiac = 7<br>ECMO <sup>f</sup> = 1<br>Unknown = 3                            | n = 375, 447, 115, 3396, 14795, 409, 160, 150, 140, 266, 281, 51, 494, 66, 390, 160, 519, 1489, 7914, 137<br><br>Total = 31,754 | Mortality, duration of mechanical ventilation, length of stay                                      |
| Urine output <0.5mL/kg/hr for ≥12 hours                                                     |                                                                                                                                                        |                                                                             |                                                                                                                |                                                                                                                                 |                                                                                                    |
| Serum creatinine increase ≥2 times baseline                                                 |                                                                                                                                                        |                                                                             |                                                                                                                |                                                                                                                                 |                                                                                                    |
| Decrease in eGFR <sup>b</sup> to <35mL/min/1.73m <sup>2</sup>                               | KDIGO <sup>g</sup> = 15<br>(References 11, 13, 35, 39, 58, 81, 89, 98, 100, 139, 148, 157, 161, 165, 171)                                              | Retrospective cohort = 9<br>Prospective cohort = 5<br>Cross-sectional = 1   | Mixed = 6<br>Non-cardiac = 4<br>Cardiac = 3<br>NICU <sup>h</sup> = 2                                           | n = 538, 14795, 160, 3009, 493, 8260, 160, 4984, 1489, 95, 101, 1696, 353, 1622, 81<br><br>Total = 37,837                       | Mortality, length of stay, duration of mechanical ventilation, composite (death or new disability) |
| RRT <sup>i</sup> (not for hyperammonemia or toxin removal)                                  | 1                                                                                                                                                      | Retrospective cohort                                                        | ECMO <sup>f</sup>                                                                                              | n = 7,914                                                                                                                       | Mortality                                                                                          |
| <b>TOTAL</b>                                                                                | <b>37 studies</b>                                                                                                                                      | Retrospective = 20, prospective = 14, cross-sectional = 1, case-control = 1 | Mixed = 11<br>Non-cardiac = 9<br>Cardiac = 10<br>Unknown = 3<br>ECMO <sup>f</sup> = 1<br>NICU <sup>h</sup> = 2 | n = 56,118                                                                                                                      | Mortality, length of stay, mechanical ventilation, new disability                                  |

<sup>a</sup>ICU: intensive care unit

<sup>b</sup>eGFR: estimated glomerular filtration rate

<sup>c</sup>AKIN: Acute Kidney Injury Network

<sup>d</sup>RIFLE: Risk Injury Failure Loss of kidney function End-stage kidney disease

<sup>e</sup>pRIFLE: pediatric-modified Risk Injury Failure Loss of kidney function End-stage kidney disease

<sup>f</sup>ECMO: extracorporeal membrane oxygenation

<sup>g</sup>KDIGO: Kidney Diseases: Improving Global Outcomes

<sup>h</sup>NICU: neonatal intensive care unit

<sup>i</sup>RRT: renal replacement therapy

**Table 3.** Literature Supporting Association of Fluid Overload and Outcome

| Proposed Definition                                                                | Number of Studies                                                                                                         | Types of Studies                                  | Setting                                                                            | Patient Population                                                                                                                 | Outcomes Studied                                                                                                                                                                                                        |
|------------------------------------------------------------------------------------|---------------------------------------------------------------------------------------------------------------------------|---------------------------------------------------|------------------------------------------------------------------------------------|------------------------------------------------------------------------------------------------------------------------------------|-------------------------------------------------------------------------------------------------------------------------------------------------------------------------------------------------------------------------|
| Fluid overload or positive fluid balance over 20% (equal to 200ml/kg) <sup>a</sup> | 24<br>(References 1, 9, 17, 24, 37, 41, 46, 60, 61, 64, 68, 69, 76, 77, 101, 103, 128, 144, 146, 147, 154, 160, 167, 179) | Retrospective cohort = 18<br>Prospective cohort 5 | Mixed = 6<br>Non-cardiac = 7<br>Cardiac = 3<br>HCT <sup>b</sup> = 1<br>Unknown = 6 | n = 21, 53, 113, 88, 76, 131, 297, 123, 113, 116, 21, 98, 114, 224, 317, 193, 435, 80, 100, 370, 168, 313, 68<br><br>Total = 3,632 | Mortality, ventilator-free days, oxygenation index, composite (death, RRT <sup>c</sup> need, ECMO <sup>d</sup> need), length of stay, duration of mechanical ventilation, acute kidney injury, PELOD <sup>e</sup> score |

<sup>a</sup>Fluid overload (FO) can be calculated using intake and output or weight. Use of weight-based formula for fluid overload is preferential if weight data are available.

For weight-based determination,  $FO = \frac{\text{Current weight (kg)} - \text{ICU admission weight (kg)}}{\text{ICU Admission weight (kg)}} \times 100\%$ .

For ins/outs based determination,  $FO = \frac{\text{Cumulative fluid balance NET (fluid IN - fluid OUT)}}{\text{ICU Admission weight (kg)}} \times 100\%$ .

<sup>b</sup>HCT: hematopoietic cell transplant

<sup>c</sup>RRT: renal replacement therapy

<sup>d</sup>ECMO: extracorporeal membrane oxygenation

<sup>e</sup>PELOD: pediatric logistic organ dysfunction

## References:<sup>1-192</sup>

1. Abulebda K, Cvijanovich NZ, Thomas NJ, et al. Post-ICU admission fluid balance and pediatric septic shock outcomes: A risk-stratified analysis. *Crit Care Med*. 2014;42(2):397-403.
2. Afroz S, Ferdous T, Hanif M, Mollah AH, Banerjee M, Khan TH. Role of pRIFLE criteria in early diagnosis of severity staging of neonatal AKI and its impact on management. *Mymensingh medical journal : MMJ*. 2017;26(2):279-286.
3. Akcan-Arikan A, Zappitelli M, Loftis LL, Washburn KK, Jefferson LS, Goldstein SL. Modified RIFLE criteria in critically ill children with acute kidney injury. *Kidney Int*. 2007;71(10):1028-35.
4. Akcan-Arikan A, Gebhard DJ, Arnold MA, Loftis LL, Kennedy CE. Fluid overload and kidney injury score: A multidimensional real-time assessment of renal disease burden in the critically ill patient. *Pediatr Crit Care Med*. 2017;18(6):524-530.
5. Alcaraz AJ, Gil-Ruiz M, Castillo A, et al. Postoperative neutrophil gelatinase-associated lipocalin predicts acute kidney injury after pediatric cardiac surgery. *Pediatric Critical Care Medicine*. 2014;15(2):121-130.
6. Ali FN, Hassinger A, Price H, Langman CB. Preoperative plasma FGF23 levels predict acute kidney injury in children: Results of a pilot study. *Pediatr Nephrol*. 2013;28(6):959-62.
7. Alkandari O, Eddington KA, Hyder A, et al. Acute kidney injury is an independent risk factor for pediatric intensive care unit mortality, longer length of stay and prolonged mechanical ventilation in critically ill children: A two-center retrospective cohort study. *Crit Care*. 2011;15(3):R146.
8. Amini S, Abbaspour H, Morovatdar N, Robabi HN, Soltani G, Tashnizi MA. Risk factors and outcome of acute kidney injury after congenital heart surgery: A prospective observational study. *Indian J Crit Care Med*. 2017;21(12):847-851.
9. Arikan AA, Zappitelli M, Goldstein SL, Naipaul A, Jefferson LS, Loftis LL. Fluid overload is associated with impaired oxygenation and morbidity in critically ill children. *Pediatr Crit Care Med*. 2012;13(3):253-258. doi: 10.1097/PCC.0b013e31822882a3 [doi].
10. Asilloglu N, Acikgoz Y, Paksu MS, Gunaydin M, Ozkaya O. Is serum cystatin C a better marker than serum creatinine for monitoring renal function in pediatric intensive care unit? *J Trop Pediatr*. 2012;58(6):429-34.
11. Askenazi D, Abitbol C, Boohaker L, et al. Optimizing the AKI definition during first postnatal week using assessment of worldwide acute kidney injury epidemiology in neonates (AWAKEN) cohort. *Pediatr Res*. 2019;85(3):329-338.
12. Askenazi DJ, Ambalavanan N, Hamilton K, et al. Acute kidney injury and renal replacement therapy independently predict mortality in neonatal and pediatric noncardiac patients on extracorporeal membrane oxygenation. *Pediatric critical care medicine : a journal of the Society of Critical Care Medicine and the World Federation of Pediatric Intensive and Critical Care Societies*. 2011;12(1):1.
13. Aygun F. Prognosis and early prediction of acute kidney injury in critically ill children. *Nephro-Urology Monthly*. 2018;10(6).
14. Bai Z, Fang F, Xu Z, et al. Serum and urine FGF23 and IGFBP-7 for the prediction of acute kidney injury in critically ill children. *BMC Pediatr*. 2018;18(1):192.
15. Baskin E, Saygili A, Harmanci K, et al. Acute renal failure and mortality after open-heart surgery in infants. *Ren Fail*. 2005;27(5):557-60.
16. Basu RK, Standage SW, Cvijanovich NZ, et al. Identification of candidate serum biomarkers for severe septic shock-associated kidney injury via microarray. *Crit Care*. 2011;15(6):R273.

17. Basu RK, Zappitelli M, Brunner L, et al. Derivation and validation of the renal angina index to improve the prediction of acute kidney injury in critically ill children. *Kidney Int.* 2014;85(3):659-67.
18. Basu RK, Wang Y, Wong HR, Chawla LS, Wheeler DS, Goldstein SL. Incorporation of biomarkers with the renal angina index for prediction of severe AKI in critically ill children. *Clinical Journal of the American Society of Nephrology.* 2014;9(4):654-662.
19. Basu RK, Kaddourah A, Goldstein SL. Assessment of a renal angina index for prediction of severe acute kidney injury in critically ill children: A multicentre, multinational, prospective observational study. *Lancet Child Adolesc Health.* 2018;2(2):112-120.
20. Bennett M, Dent CL, Ma Q, et al. Urine NGAL predicts severity of acute kidney injury after cardiac surgery: A prospective study. *Clinical journal of the American Society of Nephrology : CJASN.* 2008;3(3):665-73.
21. Bennett MR, Pyles O, Ma Q, Devarajan P. Preoperative levels of urinary uromodulin predict acute kidney injury after pediatric cardiopulmonary bypass surgery. *Pediatric Nephrology.* 2018;33(3):521-526.
22. Bestati N, Leteurtre S, Duhamel A, et al. Differences in organ dysfunctions between neonates and older children: A prospective, observational, multicenter study. *Crit Care.* 2010;14(6):R202.
23. Bezerra CT, Vaz Cunha LC, Liborio AB. Defining reduced urine output in neonatal ICU: Importance for mortality and acute kidney injury classification. *Nephrology, dialysis, transplantation : official publication of the European Dialysis and Transplant Association - European Renal Association.* 2013;28(4):901-9.
24. Bhaskar P, Dhar AV, Thompson M, Quigley R, Modem V. Early fluid accumulation in children with shock and ICU mortality: A matched case-control study. *Intensive Care Med.* 2015;41(8):1445-1453.
25. Bjork J, Nyman U, Berg U, et al. Validation of standardized creatinine and cystatin C GFR estimating equations in a large multicentre european cohort of children. *Pediatr Nephrol.* 2019;34(6):1087-1098.
26. Bojan M, Lopez-Lopez V, Pouard P, Falissard B, Journois D. Limitations of early serum creatinine variations for the assessment of kidney injury in neonates and infants with cardiac surgery. *PLoS one.* 2013;8(11):e79308.
27. Bojan M, Vicca S, Lopez-Lopez V, et al. Predictive performance of urine neutrophil gelatinase-associated lipocalin for dialysis requirement and death following cardiac surgery in neonates and infants. *Clinical journal of the American Society of Nephrology : CJASN.* 2014;9(2):285-94.
28. Borasino S, Wall KM, Crawford JH, et al. Furosemide response predicts acute kidney injury after cardiac surgery in infants and neonates. *Pediatr Crit Care Med.* 2018;19(4):310-317.
29. Bresolin N, Bianchini AP, Haas CA. Pediatric acute kidney injury assessed by pRIFLE as a prognostic factor in the intensive care unit. *Pediatr Nephrol.* 2013;28(3):485-92.
30. Bucholz EM, Whitlock RP, Zappitelli M, et al. Cardiac biomarkers and acute kidney injury after cardiac surgery. *Pediatrics.* 2015;135(4):945.
31. Burra V, Nagaraja PS, Singh NG, Prabhakar V, Manjunatha N. Early prediction of acute kidney injury using serum phosphorus as a biomarker in pediatric cardiac surgical patients. *Ann Card Anaesth.* 2018;21(4):455-459.
32. Cabral FC, Ramos Garcia PC, Mattiello R, et al. Influence of acute kidney injury defined by the pediatric risk, injury, failure, loss, end-stage renal disease score on the clinical course of PICU patients. *Pediatric critical care medicine : a journal of the Society of Critical Care Medicine and the World Federation of Pediatric Intensive and Critical Care Societies.* 2015;16(8):275.

33. Cantinotti M, Storti S, Lorenzoni V, et al. The combined use of neutrophil gelatinase-associated lipocalin and brain natriuretic peptide improves risk stratification in pediatric cardiac surgery. *Clinical chemistry and laboratory medicine*. 2012;50(11):2009-17.
34. Cantinotti M, Giordano R, Scalese M, et al. Diagnostic accuracy and prognostic value of plasmatic cystatin-C in children undergoing pediatric cardiac surgery. *Clin Chim Acta*. 2017;471:113-118.
35. Cavallin F, Rubin G, Vidal E, et al. Prognostic role of acute kidney injury on long-term outcome in infants with hypoxic-ischemic encephalopathy. *Pediatr Nephrol*. 2019.
36. Chiravuri SD, Riegger LQ, Christensen R, et al. Factors associated with acute kidney injury or failure in children undergoing cardiopulmonary bypass: A case-controlled study. *Paediatr Anaesth*. 2011;21(8):880-6.
37. Choi SJ, Ha EJ, Jhang WK, Park SJ. Factors associated with mortality in continuous renal replacement therapy for pediatric patients with acute kidney injury. *Pediatr Crit Care Med*. 2017;18(2):e56-e61.
38. Colasacco C, Worthen M, Peterson B, Lamberti J, Spear R. Near-infrared spectroscopy monitoring to predict postoperative renal insufficiency following repair of congenital heart disease. *World journal for pediatric & congenital heart surgery*. 2011;2(4):536-40.
39. D'Arienzo D, Hesse E, Ali R, et al. A validation study of administrative health care data to detect acute kidney injury in the pediatric intensive care unit. *Can J Kidney Health Dis*. 2019;6:2054358119827525.
40. de Fontnouvelle CA, Greenberg JH, Thiessen-Philbrook H, et al. Interleukin-8 and tumor necrosis factor predict acute kidney injury after pediatric cardiac surgery. *Ann Thorac Surg*. 2017;104(6):2072-2079.
41. de Galasso L, Emma F, Picca S, Di Nardo M, Rossetti E, Guzzo I. Continuous renal replacement therapy in children: Fluid overload does not always predict mortality. *Pediatr Nephrol*. 2016;31(4):651-9.
42. de Melo Bezerra Cavalcante, C. T., Castelo Branco KM, Pinto Junior VC, et al. Syndecan-1 improves severe acute kidney injury prediction after pediatric cardiac surgery. *J Thorac Cardiovasc Surg*. 2016;152(1):178-186.e2.
43. Deep A, Sagar H, Goonasekera C, Karthikeyan P, Brierley J, Douiri A. Evolution of acute kidney injury and its association with systemic hemodynamics in children with fluid-refractory septic shock. *Crit Care Med*. 2018;46(7):e677-e683.
44. Dent CL, Ma Q, Dastrala S, et al. Plasma neutrophil gelatinase-associated lipocalin predicts acute kidney injury, morbidity and mortality after pediatric cardiac surgery: A prospective uncontrolled cohort study. *Crit Care*. 2007;11(6):R127.
45. Devarajan P, Krawczeski CD, Nguyen MT, Kathman T, Wang Z, Parikh CR. Proteomic identification of early biomarkers of acute kidney injury after cardiac surgery in children. *American Journal of Kidney Diseases*. 2010;56(4):632-642.
46. Diaz F, Benfield M, Brown L, Hayes L. Fluid overload and outcomes in critically ill children: A single center prospective cohort study. *J Crit Care*. 2017;39:209-213.
47. Dobiliene D, Masalskiene J, Rudaitis S, Vitkauskiene A, Peciulyte J, Kevalas R. Early diagnosis and prognostic value of acute kidney injury in critically ill patients. *Medicina (Kaunas)*. 2019;55(8).
48. Dong L, Ma Q, Bennett M, Devarajan P. Urinary biomarkers of cell cycle arrest are delayed predictors of acute kidney injury after pediatric cardiopulmonary bypass. *Pediatric Nephrology*. 2017;32(12):2351-2360.
49. Dubey NK, Yadav P, Dutta AK, Kumar V, Ray GN, Batra S. Free oxygen radicals in acute renal failure. *Indian Pediatr*. 2000;37(2):153-8.
50. Elella RA, Habib E, Mokrusova P, et al. Incidence and outcome of acute kidney injury by the pRIFLE criteria for children receiving extracorporeal membrane oxygenation after heart surgery. *Annals of Saudi medicine*. 2017;37(3):201-206.



51. El-Gamasy M, El-Sadek A, Fakhreldin AR, Kamel A, Elbehery EG. Heat shock protein 60 as a biomarker for acute kidney injury secondary to septic shock in pediatric patients, egyptian multicenter experience. *Saudi J Kidney Dis Transpl.* 2018;29(4):852-862.
52. Esch JJ, Salvin JM, Thiagarajan RR, Del Nido PJ, Rajagopal SK. Acute kidney injury after fontan completion: Risk factors and outcomes. *J Thorac Cardiovasc Surg.* 2015;150(1):190-7.
53. Fang F, Hu X, Dai X, et al. Subclinical acute kidney injury is associated with adverse outcomes in critically ill neonates and children. *Crit Care.* 2018;22(1):256.
54. Fargason CA, Langman CB. Limitations of the pediatric risk of mortality score in assessing children with acute renal failure. *Pediatr Nephrol.* 1993;7(6):703-7.
55. Ferah O, Akbulut A, Acik ME, et al. Acute kidney injury after pediatric liver transplantation. *Transplant Proc.* 2019;51(7):2486-2491.
56. Fernandez C, Lopez-Herce J, Flores JC, et al. Prognosis in critically ill children requiring continuous renal replacement therapy. *Pediatr Nephrol.* 2005;20(10):1473-7.
57. Ferrer NMB, de Melo Bezerra Cavalcante, C. T., Branco KMC, et al. Urinary syndecan-1 and acute kidney injury after pediatric cardiac surgery. *Clin Chim Acta.* 2018;485:205-209.
58. Fitzgerald JC, Basu RK, Akcan-Arikan A, et al. Acute kidney injury in pediatric severe sepsis: An independent risk factor for death and new disability. *Crit Care Med.* 2016;44(12):2241-2250.
59. Flores FX, Brophy PD, Symons JM, et al. Continuous renal replacement therapy (CRRT) after stem cell transplantation. A report from the prospective pediatric CRRT registry group. *Pediatr Nephrol.* 2008;23(4):625-630.
60. Flori HR, Church G, Liu KD, Gildengorin G, Matthay MA. Positive fluid balance is associated with higher mortality and prolonged mechanical ventilation in pediatric patients with acute lung injury. *Crit Care Res Pract.* 2011;2011:854142.
61. Foland JA, Fortenberry JD, Warshaw BL, et al. Fluid overload before continuous hemofiltration and survival in critically ill children: A retrospective analysis. *Crit Care Med.* 2004;32(8):1771-1776.
62. Fuhrman DY, Kellum JA, Joyce EL, et al. The use of urinary biomarkers to predict acute kidney injury in children after liver transplant. *Pediatr Transplant.* 2019:e13608.
63. Gawadia J, Mishra K, Kumar M, Saikia D. Prediction of severe acute kidney injury using renal angina index in a pediatric intensive care unit. *Indian Pediatr.* 2019;56(8):647-652.
64. Gillespie RS, Seidel K, Symons JM. Effect of fluid overload and dose of replacement fluid on survival in hemofiltration. *Pediatr Nephrol.* 2004;19(12):1394-1399.
65. Gil-Ruiz Gil-Esparza MA, Alcaraz Romero AJ, Romero Otero A, et al. Prognostic relevance of early AKI according to pRIFLE criteria in children undergoing cardiac surgery. *Pediatr Nephrol.* 2014;29(7):1265-72.
66. Giordano R, Cantinotti M, Arcieri L, Poli V, Pak V, Murzi B. Arterial switch operation and plasma biomarkers: Analysis and correlation with early postoperative outcomes. *Pediatr Cardiol.* 2017;38(5):1071-1076.
67. Gist KM, Kaufman J, da Cruz EM, et al. A decline in intraoperative renal near-infrared spectroscopy is associated with adverse outcomes in children following cardiac surgery. *Pediatric critical care medicine : a journal of the Society of Critical Care Medicine and the World Federation of Pediatric Intensive and Critical Care Societies.* 2016;17(4):342-9.

68. Goldstein SL, Currier H, Graf C, Cosio CC, Brewer ED, Sachdeva R. Outcome in children receiving continuous venovenous hemofiltration. *Pediatrics*. 2001;107(6):1309-1312.
69. Goldstein SL, Somers MJ, Baum MA, et al. Pediatric patients with multi-organ dysfunction syndrome receiving continuous renal replacement therapy. *Kidney Int*. 2005;67(2):653-658.
70. Greenberg JH, Whitlock R, Zhang WR, et al. Interleukin-6 and interleukin-10 as acute kidney injury biomarkers in pediatric cardiac surgery. *Pediatric Nephrology*. 2015;30(9):1519-1527.
71. Haase M, Devarajan P, Haase-Fielitz A, et al. The outcome of neutrophil gelatinase-associated lipocalin-positive subclinical acute kidney injury: A multicenter pooled analysis of prospective studies. *J Am Coll Cardiol*. 2011;57(17):1752-61.
72. Hamed HM, El-Sherbini S, Barakat NA, Farid TM, Rasheed EA. Serum cystatin C is a poor biomarker for diagnosing acute kidney injury in critically-ill children. *Indian journal of critical care medicine : peer-reviewed, official publication of Indian Society of Critical Care Medicine*. 2013;17(2):92-8.
73. Han WK, Waikar SS, Johnson A, et al. Urinary biomarkers in the early diagnosis of acute kidney injury. *Kidney Int*. 2008;73(7):863-869.
74. Hassinger AB, Wainwright MS, Lane JC, Haymond S, Backer CL, Wald E. Elevated preoperative serum asymmetrical dimethylarginine (ADMA) is associated with poor outcomes after pediatric cardiac surgery. *Intensive Care Med*. 2012;38(10):1697-704.
75. Hassinger AB, Backer CL, Lane JC, Haymond S, Wang D, Wald EL. Predictive power of serum cystatin C to detect acute kidney injury and pediatric-modified RIFLE class in children undergoing cardiac surgery. *Pediatric critical care medicine : a journal of the Society of Critical Care Medicine and the World Federation of Pediatric Intensive and Critical Care Societies*. 2012;13(4):435-40.
76. Hassinger AB, Wald EL, Goodman DM. Early postoperative fluid overload precedes acute kidney injury and is associated with higher morbidity in pediatric cardiac surgery patients. *Pediatric critical care medicine : a journal of the Society of Critical Care Medicine and the World Federation of Pediatric Intensive and Critical Care Societies*. 2014;15(2):131-8.
77. Hayes LW, Oster RA, Tofil NM, Tolwani AJ. Outcomes of critically ill children requiring continuous renal replacement therapy. *J Crit Care*. 2009;24(3):394-400.
78. Hazle MA, Gajarski RJ, Aiyagari R, et al. Urinary biomarkers and renal near-infrared spectroscopy predict intensive care unit outcomes after cardiac surgery in infants younger than 6 months of age. *J Thorac Cardiovasc Surg*. 2013;146(4):861-867.e1.
79. Herbert C, Patel M, Nugent A, et al. Serum cystatin C as an early marker of neutrophil gelatinase-associated lipocalin-positive acute kidney injury resulting from cardiopulmonary bypass in infants with congenital heart disease. *Congenital heart disease*. 2015;10(4):180.
80. Hessey E, Ali R, Dorais M, et al. Evaluation of height-dependent and height-independent methods of estimating baseline serum creatinine in critically ill children. *Pediatr Nephrol*. 2017.
81. Hessey E, Morissette G, Lacroix J, et al. Long-term mortality after acute kidney injury in the pediatric ICU. *Hosp Pediatr*. 2018;8(5):260-268.
82. Hoffman SB, Massaro AN, Soler-Garcia A, Perazzo S, Ray PE. A novel urinary biomarker profile to identify acute kidney injury (AKI) in critically ill neonates: A pilot study. *Pediatr Nephrol*. 2013;28(11):2179-88.

83. Hollander SA, Montez-Rath M, Axelrod DM, et al. Recovery from acute kidney injury and CKD following heart transplantation in children, adolescents, and young adults: A retrospective cohort study. *Am J Kidney Dis.* 2016;68(2):212-218.
84. Hornik CP, Krawczeski CD, Zappitelli M, et al. Serum brain natriuretic peptide and risk of acute kidney injury after cardiac operations in children. *Ann Thorac Surg.* 2014;97(6):2142-7.
85. Hui WF, Chan WK, Miu TY. Acute kidney injury in the paediatric intensive care unit: Identification by modified RIFLE criteria. *Hong Kong medical journal = Xianggang yi xue za zhi.* 2013;19(1):13-9.
86. Jayakumar C, Ranganathan P, Devarajan P, Krawczeski CD, Looney S, Ramesh G. Semaphorin 3A is a new early diagnostic biomarker of experimental and pediatric acute kidney injury. *PLoS ONE.* 2013;8(3).
87. Jhang WK, Kim YA, Ha EJ, et al. Extrarenal sequential organ failure assessment score as an outcome predictor of critically ill children on continuous renal replacement therapy. *Pediatr Nephrol.* 2014;29(6):1089-95.
88. Joffe R, Al Aklabi M, Bhattacharya S, et al. Cardiac surgery-associated kidney injury in children and renal oximetry. *Pediatr Crit Care Med.* 2018;19(9):839-845.
89. Kaddourah A, Basu RK, Bagshaw SM, Goldstein SL, AWARE Investigators. Epidemiology of acute kidney injury in critically ill children and young adults. *N Engl J Med.* 2017;376(1):11-20.
90. Kakajiwala A, Kim JY, Hughes JZ, et al. Lack of furosemide responsiveness predicts acute kidney injury in infants after cardiac surgery. *Ann Thorac Surg.* 2017;104(4):1388-1394.
91. Kari JA, Shalaby MA, Sofyani K, et al. Urinary neutrophil gelatinase-associated lipocalin (NGAL) and serum cystatin C measurements for early diagnosis of acute kidney injury in children admitted to PICU. *World J Pediatr.* 2018;14(2):134-142.
92. Kaur R, Dhooria GS, Pooni PA, et al. Utilization of the renal angina index in PICU of a developing country for prediction of subsequent severe acute kidney injury. *Pediatr Nephrol.* 2018;33(11):2185-2191.
93. Kavaz A, Ozcakar ZB, Kendirli T, Ozturk BB, Ekim M, Yalcinkaya F. Acute kidney injury in a paediatric intensive care unit: Comparison of the pRIFLE and AKIN criteria. *Acta Paediatr.* 2012;101(3):126.
94. Krawczeski CD, Vandevoorde RG, Kathman T, et al. Serum cystatin C is an early predictive biomarker of acute kidney injury after pediatric cardiopulmonary bypass. *Clinical journal of the American Society of Nephrology : CJASN.* 2010;5(9):1552-7.
95. Krawczeski CD, Woo JG, Wang Y, Bennett MR, Ma Q, Devarajan P. Neutrophil gelatinase-associated lipocalin concentrations predict development of acute kidney injury in neonates and children after cardiopulmonary bypass. *J Pediatr.* 2011;158(6):1009-1015.e1.
96. Krawczeski CD, Goldstein SL, Woo JG, et al. Temporal relationship and predictive value of urinary acute kidney injury biomarkers after pediatric cardiopulmonary bypass. *J Am Coll Cardiol.* 2011;58(22):2301-9.
97. Krishnamurthy S, Narayanan P, Prabha S, et al. Clinical profile of acute kidney injury in a pediatric intensive care unit from southern india: A prospective observational study. *Indian journal of critical care medicine : peer-reviewed, official publication of Indian Society of Critical Care Medicine.* 2013;17(4):207-13.
98. Lagos-Arevalo P, Palijan A, Vertullo L, et al. Cystatin C in acute kidney injury diagnosis: Early biomarker or alternative to serum creatinine? *Pediatric Nephrology.* 2015;30(4):665-676.
99. Lee SH, Kim SJ, Kim HJ, Son JS, Lee R, Yoon TG. Acute kidney injury following cardiopulmonary bypass in children- risk factors and outcomes. *Circulation journal : official journal of the Japanese Circulation Society.* 2017;81(10):1522-1527.

100. Lex DJ, Toth R, Cserep Z, et al. A comparison of the systems for the identification of postoperative acute kidney injury in pediatric cardiac patients. *Ann Thorac Surg*. 2014;97(1):202-10.
101. Li Y, Wang J, Bai Z, et al. Early fluid overload is associated with acute kidney injury and PICU mortality in critically ill children. *Eur J Pediatr*. 2016;175(1):39-48.
102. Liu KD, Altmann C, Smits G, et al. Serum interleukin-6 and interleukin-8 are early biomarkers of acute kidney injury and predict prolonged mechanical ventilation in children undergoing cardiac surgery: A case-control study. *Crit Care*. 2009;13(4):R104.
103. Lombel RM, Kommareddi M, Mottes T, et al. Implications of different fluid overload definitions in pediatric stem cell transplant patients requiring continuous renal replacement therapy. *Intensive Care Med*. 2012;38(4):663-9.
104. MacDonald C, Norris C, Alton GY, Urschel S, Joffe AR, Morgan CJ. Acute kidney injury after heart transplant in young children: Risk factors and outcomes. *Pediatr Nephrol*. 2016;31(4):671-8.
105. Martin SM, Balestracci A, Aprea V, et al. Acute kidney injury in critically ill children: Incidence and risk factors for mortality. *Arch Argent Pediatr*. 2013;111(5):411-6.
106. Mathur NB, Agarwal HS, Maria A. Acute renal failure in neonatal sepsis. *Indian J Pediatr*. 2006;73(6):499-502.
107. Matics TJ, Sanchez-Pinto L. Adaptation and validation of a pediatric sequential organ failure assessment score and evaluation of the sepsis-3 definitions in critically ill children. *JAMA pediatrics*. 2017;171(10):e172352.
108. McCaffrey J, Coupes B, Chaloner C, Webb NJA, Barber R, Lennon R. Towards a biomarker panel for the assessment of AKI in children receiving intensive care. *Pediatric Nephrology*. 2015;30(10):1861-1871.
109. Meersch M, Schmidt C, Van Aken H, et al. Validation of cell-cycle arrest biomarkers for acute kidney injury after pediatric cardiac surgery. *PLoS one*. 2014;9(10):e110865.
110. Menon S, Goldstein SL, Mottes T, et al. Urinary biomarker incorporation into the renal angina index early in intensive care unit admission optimizes acute kidney injury prediction in critically ill children: A prospective cohort study. *Nephrology, dialysis, transplantation : official publication of the European Dialysis and Transplant Association - European Renal Association*. 2016;31(4):586-94.
111. Mishra J, Dent C, Tarabishi R, et al. Neutrophil gelatinase-associated lipocalin (NGAL) as a biomarker for acute renal injury after cardiac surgery. *Lancet (London, England)*. 2005;365(9466):1231-8.
112. Mishra OP, Pooniya V, Ali Z, Upadhyay RS, Prasad R. Antioxidant status of children with acute renal failure. *Pediatr Nephrol*. 2008;23(11):2047-51.
113. Neunhoeffler F, Wiest M, Sandner K, et al. Non-invasive measurement of renal perfusion and oxygen metabolism to predict postoperative acute kidney injury in neonates and infants after cardiopulmonary bypass surgery. *Br J Anaesth*. 2016;117(5):623-634.
114. Nguyen MT, Ross GF, Dent CL, Devarajan P. Early prediction of acute renal injury using urinary proteomics. *Am J Nephrol*. 2005;25(4):318-326.
115. Örmeci T, Alkan-Bozkaya T, Özyüksel A, et al. Correlation between cerebral-renal near-infrared spectroscopy and ipsilateral renal perfusion parameters as clinical outcome predictors after open heart surgery in neonates and infants. *Artif Organs*. 2015;39(1):53-58.
116. Palermo J, Dart AB, De Mello A, et al. Biomarkers for early acute kidney injury diagnosis and severity prediction: A pilot multicenter canadian study of children admitted to the ICU. *Pediatr Crit Care Med*. 2017;18(6):e235-e244.

117. Palmieri T, Lavrentieva A, Greenhalgh D. An assessment of acute kidney injury with modified RIFLE criteria in pediatric patients with severe burns. *Intensive Care Med.* 2009;35(12):2125-2129.
118. Parikh CR, Thiessen-Philbrook H, Garg AX, et al. Performance of kidney injury molecule-1 and liver fatty acid-binding protein and combined biomarkers of aki after cardiac surgery. *Clinical Journal of the American Society of Nephrology.* 2013;8(7):1079-1088.
119. Park SK, Hur M, Kim E, et al. Risk factors for acute kidney injury after congenital cardiac surgery in infants and children: A retrospective observational study. *PloS one.* 2016;11(11):e0166328.
120. Peco-Antic A, Ivanisevic I, Vulicevic I, et al. Biomarkers of acute kidney injury in pediatric cardiac surgery. *Clin Biochem.* 2013;46(13-14):1244-51.
121. Penk J, Gist KM, Wald EL, et al. Furosemide response predicts acute kidney injury in children after cardiac surgery. *J Thorac Cardiovasc Surg.* 2019;157(6):2444-2451.
122. Plötz FB, Bouma AB, van Wijk JA, Kneyber MC, Bökenkamp A. Pediatric acute kidney injury in the ICU: An independent evaluation of pRIFLE criteria. *Intensive Care Med.* 2008;34(9):1713-1717.
123. Polat M, Fidan K, Derinoz O, Gonen S, Soylemezoglu O. Neutrophil gelatinase-associated lipocalin as a follow-up marker in critically ill pediatric patients with established acute kidney injury. *Ren Fail.* 2013;35(3):352-6.
124. Portilla D, Dent C, Sugaya T, et al. Liver fatty acid-binding protein as a biomarker of acute kidney injury after cardiac surgery. *Kidney Int.* 2008;73(4):465-72.
125. Prasetyo RV, Saraswati PD, Kurniawan MR, et al. The use of PELOD score in predicting acute kidney injury in critically ill children. *Journal of Nepal Paediatric Society.* 2016;36(2):165-169.
126. Raggal NE, Khafagy SM, Mahmoud NH, Beltagy SE. Serum neutrophil gelatinase-associated lipocalin as a marker of acute kidney injury in asphyxiated neonates. *Indian Pediatr.* 2013;50(5):459-62.
127. Ramesh G, Krawczeski CD, Woo JG, Wang Y, Devarajan P. Urinary netrin-1 is an early predictive biomarker of acute kidney injury after cardiac surgery. *Clinical journal of the American Society of Nephrology : CJASN.* 2010;5(3):395-401.
128. Raymakers-Janssen P, Lilien MR, Tibboel D, et al. Epidemiology and outcome of critically ill pediatric cancer and hematopoietic stem cell transplant patients requiring continuous renal replacement therapy: A retrospective nationwide cohort study. *Crit Care Med.* 2019;47(11):e893-e901.
129. Ricci Z, Morelli S, Favia I, Garisto C, Brancaccio G, Picardo S. Neutrophil gelatinase-associated lipocalin levels during extracorporeal membrane oxygenation in critically ill children with congenital heart disease: Preliminary experience. *Pediatric critical care medicine : a journal of the Society of Critical Care Medicine and the World Federation of Pediatric Intensive and Critical Care Societies.* 2012;13(1):51.
130. Ricci Z, Netto R, Garisto C, Iacoella C, Favia I, Cogo P. Whole blood assessment of neutrophil gelatinase-associated lipocalin versus pediatric RIFLE for acute kidney injury diagnosis and prognosis after pediatric cardiac surgery: Cross-sectional study\*. *Pediatric critical care medicine : a journal of the Society of Critical Care Medicine and the World Federation of Pediatric Intensive and Critical Care Societies.* 2012;13(6):667-70.
131. Ricci Z, Di Nardo M, Iacoella C, Netto R, Picca S, Cogo P. Pediatric RIFLE for acute kidney injury diagnosis and prognosis for children undergoing cardiac surgery: A single-center prospective observational study. *Pediatr Cardiol.* 2013;34(6):1404-1408.

132. Riyuzo MC, Silveira LV, Macedo CS, Fioretto JR. Predictive factors of mortality in pediatric patients with acute renal injury associated with sepsis. *J Pediatr*. 2017;93(1):28-34.
133. Roy JP, Johnson C, Towne B, et al. Use of height-independent baseline creatinine imputation method with renal angina index. *Pediatr Nephrol*. 2019;34(10):1777-1784.
134. Rustagi RS, Arora K, Das RR, Pooni PA, Singh D. Incidence, risk factors and outcome of acute kidney injury in critically ill children - a developing country perspective. *Paediatrics and international child health*. 2017;37(1):35-41.
135. Sadeghi-Bojd S, Noori NM, Mohammadi M, Teimouri A. Clinical characteristics and mortality risk prediction in children with acute kidney injury. *Nigerian medical journal : journal of the Nigeria Medical Association*. 2015;56(5):327-32.
136. Safdar OY, Shalaby M, Khathlan N, et al. Serum cystatin is a useful marker for the diagnosis of acute kidney injury in critically ill children: Prospective cohort study. *BMC nephrology*. 2016;17(1):130.
137. Saleh NY, Abo El Ftooh, W. M. M., El-Hawy M. Serum neutrophil gelatinase-associated lipocalin: A diagnostic marker in pediatric sepsis. *Pediatric critical care medicine : a journal of the Society of Critical Care Medicine and the World Federation of Pediatric Intensive and Critical Care Societies*. 2017;18(6):e245-e252.
138. Sanchez-de-Toledo J, Perez-Ortiz A, Gil L, et al. Early initiation of renal replacement therapy in pediatric heart surgery is associated with lower mortality. *Pediatr Cardiol*. 2016;37(4):623-628.
139. Sanchez-Pinto L, Goldstein SL, Schneider JB, Khemani RG. Association between progression and improvement of acute kidney injury and mortality in critically ill children. *Pediatric Critical Care Medicine*. 2015;16(8):703-710.
140. Sanchez-Pinto L, Khemani RG. Development of a prediction model of early acute kidney injury in critically ill children using electronic health record data. *Pediatric critical care medicine : a journal of the Society of Critical Care Medicine and the World Federation of Pediatric Intensive and Critical Care Societies*. 2016;17(6):508-15.
141. Santiago MJ, Lopez-Herce J, Urbano J, et al. Clinical course and mortality risk factors in critically ill children requiring continuous renal replacement therapy. *Intensive Care Med*. 2010;36(5):843-9.
142. Schneider J, Khemani R, Grushkin C, Bart R. Serum creatinine as stratified in the RIFLE score for acute kidney injury is associated with mortality and length of stay for children in the pediatric intensive care unit. *Crit Care Med*. 2010;38(3):933-939.
143. Schroeder LW, Buckley JR, Stroud RE, et al. Plasma neutrophil gelatinase-associated lipocalin is associated with acute kidney injury and clinical outcomes in neonates undergoing cardiopulmonary bypass. *Pediatr Crit Care Med*. 2019;20(10):957-962.
144. Seguin J, Albright B, Vertullo L, et al. Extent, risk factors, and outcome of fluid overload after pediatric heart surgery\*. *Crit Care Med*. 2014;42(12):2591-2599.
145. Seitz S, Rauh M, Gloeckler M, Cesnjevar R, Dittrich S, Koch AME. Cystatin C and neutrophil gelatinase-associated lipocalin: Biomarkers for acute kidney injury after congenital heart surgery. *Swiss Medical Weekly*. 2013;143.
146. Selewski DT, Cornell TT, Lombel RM, et al. Weight-based determination of fluid overload status and mortality in pediatric intensive care unit patients requiring continuous renal replacement therapy. *Intensive Care Med*. 2011;37(7):1166-73.
147. Selewski DT, Cornell TT, Blatt NB, et al. Fluid overload and fluid removal in pediatric patients on extracorporeal membrane oxygenation requiring continuous renal replacement therapy. *Crit Care Med*. 2012;40(9):2694-9.
148. Selewski DT, Cornell TT, Heung M, et al. Validation of the KDIGO acute kidney injury criteria in a pediatric critical care population. *Intensive Care Med*. 2014;40(10):1481-1488.

149. Selistre L, De Souza V, Cochat P, et al. GFR estimation in adolescents and young adults. *Journal of the American Society of Nephrology : JASN*. 2012;23(6):989-96.
150. Sethi SK, Raghunathan V, Shah S, et al. Fluid overload and renal angina index at admission are associated with worse outcomes in critically ill children. *Front Pediatr*. 2018;6:118.
151. Shalaby M, Khathlan N, Safder O, et al. Outcome of acute kidney injury in pediatric patients admitted to the intensive care unit. *Clin Nephrol*. 2014;82(6):379-86.
152. Shi SS, Yue XJ, Zhao DY, et al. Plasma gelsolin level predicts acute kidney injury after cardiopulmonary bypass in infants and young children. *World Journal of Pediatrics*. 2018;14(2):143-150.
153. Shime N, Kageyama K, Ashida H, Tanaka Y. Application of modified sequential organ failure assessment score in children after cardiac surgery. *J Cardiothorac Vasc Anesth*. 2001;15(4):463-8.
154. Sinitsky L, Walls D, Nadel S, Inwald DP. Fluid overload at 48 hours is associated with respiratory morbidity but not mortality in a general PICU: Retrospective cohort study. *Pediatr Crit Care Med*. 2015;16(3):205-209.
155. Soler YA, Nieves-Plaza M, Prieto M, Garcia-De Jesus R, Suarez-Rivera M. Pediatric risk, injury, failure, loss, end-stage renal disease score identifies acute kidney injury and predicts mortality in critically ill children: A prospective study. *Pediatric critical care medicine : a journal of the Society of Critical Care Medicine and the World Federation of Pediatric Intensive and Critical Care Societies*. 2013;14(4):189.
156. Soni M, Piggott KD, DeCampi W, et al. Are we overdiagnosing acute kidney injury in pediatric patients following cardiac surgery? *World journal for pediatric & congenital heart surgery*. 2015;6(4):496-501.
157. SooHoo MM, Patel SS, Jaggars J, Faubel S, Gist KM. Acute kidney injury defined by fluid corrected creatinine in neonates after the norwood procedure. *World Journal for Pediatric and Congenital Heart Surgery*. 2018;9(5):513-521.
158. Stanski N, Menon S, Goldstein SL, Basu RK. Integration of urinary neutrophil gelatinase-associated lipocalin with serum creatinine delineates acute kidney injury phenotypes in critically ill children. *J Crit Care*. 2019;53:1-7. doi: 10.1016/j.jcrc.2019.05.017.
159. Sugimoto K, Toda Y, Iwasaki T, et al. Urinary albumin levels predict development of acute kidney injury after pediatric cardiac surgery: A prospective observational study. *J Cardiothorac Vasc Anesth*. 2016;30(1):64-8.
160. Sutherland SM, Zappitelli M, Alexander SR, et al. Fluid overload and mortality in children receiving continuous renal replacement therapy: The prospective pediatric continuous renal replacement therapy registry. *Am J Kidney Dis*. 2010;55(2):316-25.
161. Sutherland SM, Byrnes JJ, Kothari M, et al. AKI in hospitalized children: Comparing the pRIFLE, AKIN, and KDIGO definitions. *Clinical journal of the American Society of Nephrology : CJASN*. 2015;10(4):554-61.
162. Symons JM, Chua AN, Somers MJ, et al. Demographic characteristics of pediatric continuous renal replacement therapy: A report of the prospective pediatric continuous renal replacement therapy registry. *Clin J Am Soc Nephrol*. 2007;2(4):732-738.
163. Tanyildiz M, Ekim M, Kendirli T, et al. Acute kidney injury in congenital cardiac surgery: Pediatric risk-injury-failure-loss-end-stage renal disease and acute kidney injury network. *Pediatr Int*. 2017;59(12):1252-1260.
164. Thakkar PA, Pandey N, Shringarpure KS. Paediatric RIFLE and AKIN classification for detection and outcome of acute kidney injury in critically sick children. which is better? A prospective cohort study. *Journal of Nepal Paediatric Society*. 2018;38(1):31-37.
165. Ueno K, Shiokawa N, Takahashi Y, et al. Kidney disease: Improving global outcomes in neonates with acute kidney injury after cardiac surgery. *Clin Exp Nephrol*. 2019.

166. Vaewpanich J, Akcan-Arikan A, Coss-Bu J, Kennedy CE, Starke JR, Thammasitboon S. Fluid overload and kidney injury score as a predictor for ventilator-associated events. *Front Pediatr*. 2019;7:204.
167. Valentine SL, Sapru A, Higgerson RA, et al. Fluid balance in critically ill children with acute lung injury. *Crit Care Med*. 2012;40(10):2883-2889.
168. Vassalos A, Young D, MacArthur K, Pollock J, Lyall F, Danton MHD. Cystatin C: Influence of perfusion and myocardial injury on early (*Paediatr Anaesth*. 2011;21(12):1185-1191.
169. Volovelsky O, Terrell TC, Swain H, Bennett MR, Cooper DS, Goldstein SL. Pre-operative level of FGF23 predicts severe acute kidney injury after heart surgery in children. *Pediatr Nephrol*. 2018;33(12):2363-2370.
170. Volpon LC, Sugo EK, Carlotti AP. Diagnostic and prognostic value of serum cystatin C in critically ill children with acute kidney injury. *Pediatric critical care medicine : a journal of the Society of Critical Care Medicine and the World Federation of Pediatric Intensive and Critical Care Societies*. 2015;16(5):125.
171. Volpon LC, Sugo EK, Consulin JC, Tavares TL, Aragon DC, Carlotti AP. Epidemiology and outcome of acute kidney injury according to pediatric risk, injury, failure, loss, end-stage renal disease and kidney disease: Improving global outcomes criteria in critically ill children-A prospective study. *Pediatr Crit Care Med*. 2016;17(5):229.
172. Wai K, Soler-Garcia A, Perazzo S, Mattison P, Ray PE. A pilot study of urinary fibroblast growth factor-2 and epithelial growth factor as potential biomarkers of acute kidney injury in critically ill children. *Pediatr Nephrol*. 2013;28(11):2189-98.
173. Wang L, McGregor TL, Jones DP, et al. Electronic health record-based predictive models for acute kidney injury screening in pediatric inpatients. *Pediatr Res*. 2017;82(3):465-473.
174. Washburn KK, Zappitelli M, Arikan AA, et al. Urinary interleukin-18 is an acute kidney injury biomarker in critically ill children. *Nephrology, dialysis, transplantation : official publication of the European Dialysis and Transplant Association - European Renal Association*. 2008;23(2):566-72.
175. Westhoff JH, Tönshoff B, Waldherr S, et al. Urinary tissue inhibitor of metalloproteinase-2 (TIMP-2) · insulin-like growth factor-binding protein 7 (IGFBP7) predicts adverse outcome in pediatric acute kidney injury. *PLoS ONE*. 2015;10(11).
176. Westhoff JH, Fichtner A, Waldherr S, et al. Urinary biomarkers for the differentiation of prerenal and intrinsic pediatric acute kidney injury. *Pediatr Nephrol*. 2016;31(12):2353-2363.
177. Westhoff JH, Seibert FS, Waldherr S, et al. Urinary calprotectin, kidney injury molecule-1, and neutrophil gelatinase-associated lipocalin for the prediction of adverse outcome in pediatric acute kidney injury. *Eur J Pediatr*. 2017;176(6):745-755.
178. Wheeler DS, Devarajan P, Ma Q, et al. Serum neutrophil gelatinase-associated lipocalin (NGAL) as a marker of acute kidney injury in critically ill children with septic shock. *Crit Care Med*. 2008;36(4):1297-303.
179. Wilder NS, Yu S, Donohue JE, Goldberg CS, Blatt NB. Fluid overload is associated with late poor outcomes in neonates following cardiac surgery. *Pediatric critical care medicine : a journal of the Society of Critical Care Medicine and the World Federation of Pediatric Intensive and Critical Care Societies*. 2016;17(5):420-7.
180. Wong HR, Cvijanovich NZ, Anas N, et al. A multibiomarker-based model for estimating the risk of septic acute kidney injury. *Crit Care Med*. 2015;43(8):1646-1653.
181. Xu X, Nie S, Zhang A, et al. A new criterion for pediatric AKI based on the reference change value of serum creatinine. *J Am Soc Nephrol*. 2018;29(9):2432-2442.



182. Yavuz S, Anarat A, Acarturk S, et al. Neutrophil gelatinase associated lipocalin as an indicator of acute kidney injury and inflammation in burned children. *Burns : journal of the International Society for Burn Injuries*. 2014;40(4):648-54.
183. Yoneyama F, Okamura T, Takigiku K, Yasukouchi S. Novel urinary biomarkers for acute kidney injury and prediction of clinical outcomes after pediatric cardiac surgery. *Pediatr Cardiol*. 2019.
184. Youssef DM, Esh AM, Helmy Hassan E, Ahmed TM. Serum NGAL in critically ill children in ICU from a single center in Egypt. *ISRN nephrology*. 2013;2013:140905.
185. Zappitelli M, Washburn KK, Arian AA, et al. Urine neutrophil gelatinase-associated lipocalin is an early marker of acute kidney injury in critically ill children: A prospective cohort study. *Crit Care*. 2007;11(4):R84.
186. Zappitelli M, Bernier PL, Saczkowski RS, et al. A small post-operative rise in serum creatinine predicts acute kidney injury in children undergoing cardiac surgery. *Kidney Int*. 2009;76(8):885-92.
187. Zappitelli M, Krawczeski CD, Devarajan P, et al. Early postoperative serum cystatin C predicts severe acute kidney injury following pediatric cardiac surgery. *Kidney Int*. 2011;80(6):655-62.
188. Zappitelli M, Coca SG, Garg AX, et al. The association of albumin/creatinine ratio with postoperative AKI in children undergoing cardiac surgery. *Clinical journal of the American Society of Nephrology : CJASN*. 2012;7(11):1761-9.
189. Zappitelli M, Greenberg JH, Coca SG, et al. Association of definition of acute kidney injury by cystatin C rise with biomarkers and clinical outcomes in children undergoing cardiac surgery. *JAMA pediatrics*. 2015;169(6):583-91.
190. Zheng J, Xiao Y, Yao Y, et al. Comparison of urinary biomarkers for early detection of acute kidney injury after cardiopulmonary bypass surgery in infants and young children. *Pediatr Cardiol*. 2013;34(4):880-6.
191. Zinter MS, Logan BR, Fretham C, et al. Comprehensive prognostication in critically ill pediatric hematopoietic cell transplant patients: Results from merging the center for international blood and marrow transplant research (CIBMTR) and virtual pediatric systems (VPS) registries. *Biol Blood Marrow Transplant*. 2020;26(2):333-342.
192. Zwiers AJ, Cransberg K, de Rijke YB, van Rosmalen J, Tibboel D, de Wildt SN. Urinary neutrophil gelatinase-associated lipocalin predicts renal injury following extracorporeal membrane oxygenation. *Pediatric critical care medicine : a journal of the Society of Critical Care Medicine and the World Federation of Pediatric Intensive and Critical Care Societies*. 2015;16(7):663-70.

## Research Priorities

Renal dysfunction is complex; understanding of the biologic drivers, clinical manifestations of pathophysiology, and reliable real-time adjudication of incipient or ongoing injury remains incomplete. Areas of future research with the potential to change the current treatment paradigms include:

- 1) the impact of bundled management, including use of balanced crystalloids, strict nephrotoxin avoidance, fluid balance and diuretic management,
- 2) elucidation of sub-phenotypes of AKI using existing and new biomarkers, including assessment of appropriate biomarker thresholds in children and development of a clinical renal function panel,
- 3) quality improvement methodologies for renal dysfunction and RRT,
- 4) novel technology for extracorporeal renal support dedicated specifically to children and neonates, and
- 5) leveraging the electronic medical record for machine-learning algorithms for early detection and clinical decision support for real-time management.

One of highest orders of priority is evaluation of renal dysfunction in the setting of other organ dysfunction. It is prudent to evaluate specific organ-crosstalk scenarios to ascertain the differential impact of varying degrees of renal dysfunction on management and outcomes such as cardiorenal syndrome and pulmonary-renal interactions.
